# Supplementary material for: Development of a Rapid in planta BioID System as a Probe for Plasma Membrane-Associated Immunity Proteins
Source: Front Plant Sci. 2018 Dec 18;9:1882. doi: 10.3389/fpls.2018.01882 (PMC6305590; doi:10.3389/fpls.2018.01882)
Supplement: TABLE S1 — Proteins identified by Mass spectrometry. Accession numbers, homology details and aminoacid sequence are provided for each protein identified by MS, along with the number of peptides detected in each sample. The table is colour coded to indicate which sample the peptides were detected in. [file Table_1.xlsx]

## Sheet: BioID MS Peptide Data
Table S1
		Number of peptides detected / sample
Niben Accession and ID	aa sequence	EV #1	EV #2	BirA #1	BirA #2	MP_BirA #1	MP_BirA #2	AvrPto_BirA #1	AvrPto_BirA #2	AvrPto_BirA #3
NbS00046603g0005.1 protein AED:0.09 eAED:0.09 QI:0|0.84|0.78|0.96|0.90|0.87|33|0|2199; (*GB) gi|225459364|ref|XP_002285808.1| (e_value=0.0) PREDICTED: acetyl-CoA carboxylase 1-like [Vitis vinifera];; (*SWP) sp|Q38970|ACC1_ARATH (e_value=0.0) Acetyl-CoA carboxylase 1 OS=Arabidopsis thaliana GN=ACC1 PE=1 SV=1;; (*TAIR) AT1G36160.2 (e_value=0.0) | Symbols: ACC1 | acetyl-CoA carboxylase 1 | chr1:1353…	MASYSMILLIMYVAFRHLPGKCNMSESQRRPAVIGIKNGDGYINGALPLRSPIARSEISEFCNALGGKQPIHSILIANNGMAAVKFIRSIRTWAYETFGTEKAILLVAMATPEDMRINAEHIRIADQFVEVPGGTNNNNYANVQLIVEMAEMTHVDAVWPGWGHASENPELPDALCAKGIVFLGPPATSMAALGDKVGSSLIAQAAQVPTLPWSGSHVKIPPESCLVSIPDEIYSKACVYTTEEAIASCQDVGYPAMIKASWGGGGKGIRKVHNDDEVRALFKQVQGEVPGSPIFIMKVASQSRHLEVQLLCDQYGNVAALHSRDCSVQRRHQKIIEEGPITIASPETVKKLEQAARRLAKSVNYVGAATVEYLYSMDTGEYYFLELNPRLQVEHPVTE…	61	57	52	55	55	46	32	35	42
NbS00019386g0009.1 protein AED:0.11 eAED:0.11 QI:419|0.93|0.85|1|0.69|0.58|34|596|2249; (*GB) gi|225459364|ref|XP_002285808.1| (e_value=0.0) PREDICTED: acetyl-CoA carboxylase 1-like [Vitis vinifera];; (*SWP) sp|Q38970|ACC1_ARATH (e_value=0.0) Acetyl-CoA carboxylase 1 OS=Arabidopsis thaliana GN=ACC1 PE=1 SV=1;; (*TAIR) AT1G36160.2 (e_value=0.0) | Symbols: ACC1 | acetyl-CoA carboxylase 1 | chr1:135…	MAAVKFIRSIRTWAYETFGTEKAILLVAMATPEDMRINAEHIRIADQFVEVPGGTNNNNYANVQLIVEMAEMTHVDAVWPGWGHASENPELPDALNAKGIIFLGPPATSMAALGDKIGSSLIAQAAEVPTLPWSGSHVKVPPESSLVSIPDEIYAKACVHTTEEAIASCQDVGYPAMIKASWGGGGKGIRKVHNDDEVRALFKQVQGEVPGSPIFIMKVASQSRHLEVQLLCDQYGNVAALHSRDCSVQRRHQKIIEEGPITVAPQDTVKKLEQAARRLAISVNYVGAATVEYLYSMDTGEYYFLELNPRLQVEHPVTEWIAEINLPAAQVTVGMGIPLWQIPGFVPDITFLGLRCPGSPFRIFKLSSLILLEIRRFYGMEHGAGYDAWRKTSIAATPF…	30	31	23	19	29	20	12	16	21
NbS00061587g0004.1 protein AED:0.30 eAED:0.30 QI:0|1|1|1|0.92|0.92|14|0|620; (*GB) gi|359479709|ref|XP_003632341.1| (e_value=0.0) PREDICTED: methylcrotonoyl-CoA carboxylase subunit alpha, mitochondrial-like [Vitis vinifera];; (*SWP) sp|Q42777|MCCA_SOYBN (e_value=0.0) Methylcrotonoyl-CoA carboxylase subunit alpha, mitochondrial OS=Glycine max GN=MCCA PE=1 SV=2;; (*TAIR) AT1G03090.2 (e_value=0.0) |…	AIHPGYGFLSESADFAQLCEDEGLSFIGPPASAIRDMGDKSASKRIMGAAGVPLVPGYHGDEQDIDFMKLEADKIGYPILIKPTHGGGGKGMRIVHSPNEFADSFLGAQREAAASFGISTILLEKYITKPRHIEVQIFGDKQGNIIHLYERDCSVQRRHQKIIEEAPAPNVSSDFRSHLGQAAVSAAKAVNYHSAGTVEFIVDTVSGQFYFMEMNTRLQVEHPVTEMIVGQDLVEWQIRVANGEPLPLTQSEVPFSGHAFEARIYAENVPKGFLPATGVLHRYCPVTVTSAVRVETGVVEGDTVSMHYDPMIAKLVVWGQDRLAALIKMKDCLSKFQVAGLPTNIDFLIKLASHRAFQNGEVETHFIERYKDDLFIDGANSISAQEAESAVKHAASIVA…	15	16	14	12	17	10	16	13	18
NbS00016612g0003.1 protein AED:0.07 eAED:0.08 QI:2865|0.9|0.80|1|0.83|0.83|31|0|1438; (*GB) gi|225459364|ref|XP_002285808.1| (e_value=0.0) PREDICTED: acetyl-CoA carboxylase 1-like [Vitis vinifera];; (*SWP) sp|Q38970|ACC1_ARATH (e_value=0.0) Acetyl-CoA carboxylase 1 OS=Arabidopsis thaliana GN=ACC1 PE=1 SV=1;; (*TAIR) AT1G36160.2 (e_value=0.0) | Symbols: ACC1 | acetyl-CoA carboxylase 1 | chr1:13534…	MMWCRKQLLVIQNLLSCLDSPELPFLQWQECLAVLATRLPKDLRNELEAKYKEYEGIFSLQNVEFPARILRGVLEAHLRSCSDKERGAQERLLEPLLSVVKSYEGGRESHARGIVHSLFEEYLSVEELFSDNIQADVIERLRLQYKKDLLKVVDIVLSHQGVRRKNKLILSLMEQLVYPNPAAYRDKLIRFSALNHTNYSELALKASQLLEQTKLSELRSSIARSLSELEMFTEEGDNMDTPKRKSAINERMEVLVSAPLAVEDALVGLFDHSDHTLQRRVVETYVRRLYQPYLVKESVRMQWHRSGLIATWEFLEEHVERKNGSEDNKLDKPLVEKRSERKWGAMVIIKSLQLLPSVLTAALRETAHNLHKEMSNGSVQPTNHGNMLHIALVGINNQM…	7	4	4	9	5	5	4	3	6
NbS00018872g0014.1 protein AED:0.12 eAED:0.12 QI:70|0.90|0.87|1|0.75|0.75|33|448|2345; (*GB) gi|225459364|ref|XP_002285808.1| (e_value=0.0) PREDICTED: acetyl-CoA carboxylase 1-like [Vitis vinifera];; (*SWP) sp|Q38970|ACC1_ARATH (e_value=0.0) Acetyl-CoA carboxylase 1 OS=Arabidopsis thaliana GN=ACC1 PE=1 SV=1;; (*TAIR) AT1G36160.2 (e_value=0.0) | Symbols: ACC1 | acetyl-CoA carboxylase 1 | chr1:1353…	MSEAQRMPTMIGIKSGNGHVNGALLLRSPIARAEVAEFCNALGGKRPINSILIANNGMAAVKFIRSIRTWAYETFGTEKAILLVAMATPEDMRINAEHIRIADQFVEVPGGTNNNNYANVQLIVEMAEMTHVDAVWPGWGHASENPELPDALNAKGIIFLGPPATSMAALGDKIGSSLIAQAAEVPTLPWSGSHVKVPPESSLVSIPDEIYAKACVHTTEEAIASCQDVGYPAMIKASWGGGGKGIRKVHNDDEVRALFKQVQGEVPGSPIFIMKVASQSRHLEVQLLCDQYGNVAALHSRDCSVQRRHQKIIEEGPITVAPQDTVKKLEQAARRLAISVNYVGAATVEYLYSMDTGEYYFLELNPRLQVEHPVTEWIAEINLPAAQVAVGMGIPLWQI…	6	7	3	4	3	3	3	4	4
NbS00021532g0013.1 protein AED:0.19 eAED:0.19 QI:0|0.5|0|1|0.5|1|3|0|257; (*SWP) sp|Q42533|BCCP1_ARATH (e_value=2e-13) Biotin carboxyl carrier protein of acetyl-CoA carboxylase 1, chloroplastic OS=Arabidopsis thaliana GN=BCCP1 PE=1 SV=2;; (*TAIR) AT5G16390.2 (e_value=8e-15) | Symbols: CAC1, CAC1A, BCCP, BCCP1, CAC1-A, BCCP-1 | chloroplastic acetylcoenzyme A carboxylase 1 | chr5:5361554-5363020 RE…	MTTSFGTTATPTTAASASPAVFPAKNAPKSLTLLPHCHHRRYNPSRSKLSFRFATAPKLQFSCKGLQTSRNHSAVVRAQLNEVRFFQWFSLERILSNVVSFVKNLLEPSVAFKVAVGGSSNDAATPITQSEEVKSPSETSSATSVSEESISNFISQVSSLVKLVDSRDVVELHLKQLDCEILIRKKEALPQPPPPAHTPLLQSYHVPSVQFSPPPPAPAPAPAAPPVQIPAPSPAAAKPSDSSVPPLKCPMAGTFYR	5	4	5	0	5	6	2	0	5
NbS00041919g0008.1 protein AED:0.39 eAED:0.42 QI:131|0.71|0.87|1|0.71|1|8|368|354; (*SWP) sp|Q920N2|BPL1_MOUSE (e_value=1e-35) Biotin--protein ligase OS=Mus musculus GN=Hlcs PE=1 SV=1;; (*TAIR) AT2G25710.2 (e_value=1e-129) | Symbols: HCS1 | holocarboxylase synthase 1 | chr2:10952719-10955061 FORWARD LENGTH=367;; (*ITAG) Solyc11g013200.1.1 (e_value=0.0) evidence_code:10F0H1E1IEG genomic_reference:…	MISQFKGIFFSVSLQKFPKFMTSKSKHLKAFSSSHVLGIKMESSADTLLLLSGKSEEENDVAKVLKNNNTLKNGEGVELVLHSEVKLENDDAFRIEEYFNSLSTTRFGRLLIYSPRLSSTHDVISQNNSDLPVGTVCVADVQLKGRGRSSNVWESPKGCLLFSFSIQMEDGRVVPHIQYVVCLAMTEAIKAVCLEKGTPELDVRIKWPNDLYLGGVKVGGILSTSVYRSKKFYVSAGVGLNVGNEKPTTCLNAVLKKVNPLSRELKREDVIAAFFNKFENLYDVFSEQEYGNYLNLSSILVRLLLHSDMSFKLQQGLTSSGYLLGITDDGQMCELHPDGNSFDFFKGLIKRKMS	3	2	1	1	1	0	0	0	0
NbS00008065g0005.1 protein AED:0.31 eAED:0.32 QI:213|0.87|0.77|1|1|1|9|443|287; (*GB) gi|359486366|ref|XP_002278151.2| (e_value=3e-105) PREDICTED: biotin carboxyl carrier protein of acetyl-CoA carboxylase-like [Vitis vinifera];; (*TAIR) AT3G56130.1 (e_value=4e-68) | Symbols: | biotin/lipoyl attachment domain-containing protein | chr3:20826852-20829007 FORWARD LENGTH=281;; (*ITAG) Solyc06g050590.2…	MESAAVLRSFHHSVGTTSHMRSVIEMPGVIPMNNVVFSKSTKLPLKGSSNGAKLVSSTNKHSRLIRSCAKTSETTVTTKCDDSNRRASTEKSPLLTATFPKGFEALITEVCDDTEVAELKLKIGDFELHLKRNIEAPIVPAPVVSTPPTPPPSASKPSTASTAAAPATSLGKSSSEKISPFTNVAEKSAKLAALETTGASGYVLVSCPTVGSFRRARTLKGKKQPPACKEGDVIKEGQIIGFLDQFGTEHPVRSDAAGEVLKILFNDGEAVGYGDPLIAVLPSFRGI	2	8	6	1	9	1	9	1	2
NbS00009714g0011.1 protein AED:0.20 eAED:0.20 QI:131|0.83|0.71|1|0.83|0.57|7|463|410; (*SWP) sp|Q40565|RCA2_TOBAC (e_value=0.0) Ribulose bisphosphate carboxylase/oxygenase activase 2, chloroplastic OS=Nicotiana tabacum GN=RCA PE=2 SV=1;; (*TAIR) AT2G39730.2 (e_value=0.0) | Symbols: RCA | rubisco activase | chr2:16571046-16573345 REVERSE LENGTH=446;; (*ITAG) Solyc10g086580.1.1 (e_value=0.0) eviden…	MATSVSTIGAANKAPLSLNNSVAGTLVPSTAFFGKTLKKVYGKGVSCPKVTNRSLRIAAEENKDVDPKKQTDSDRWKGLVQDFSDDQQDITRGKGMVDSLFQAPTGTGTHHAVLQSYEYVSQGLRQYNMDNTLDGFYIAPAFMDKLVVHITKNFLKLPNIKVPLILGVWGGKGQGEPAKLIRQRYREAAEIIRKGNMCCLFINDLDAGAGRMGGTTQYTVNNQMVNATLMNIADNPTNVQLPGMYNKQENARVPIVVTGNDFSTLYAPLIRDGRMEKFYWAPTREDRIGVCKGIFRTDNVPEEAVIKIVDTFPGQSIDFFGALRARVYDDEVRKWVSGTGIEAIGDKLLNTFDGPPTFEQPKMTVEKLLEYGNMLVQEQENVKRVQLAETYLKEAALGD…	2	8	9	4	7	2	7	4	2
NbS00041576g0003.1 protein AED:0.05 eAED:0.05 QI:257|0.83|0.71|1|1|1|7|244|242; (*GB) gi|255570278|ref|XP_002526099.1| (e_value=2e-52) Biotin carboxyl carrier protein subunit of of Het-ACCase (BCCP2) [Ricinus communis];; (*SWP) sp|Q9LLC1|BCCP2_ARATH (e_value=3e-45) Biotin carboxyl carrier protein of acetyl-CoA carboxylase 2, chloroplastic OS=Arabidopsis thaliana GN=BCCP2 PE=1 SV=1;; (*TAIR) AT5G1…	MASFSVPCRKISVLAIASSHSSSTQQPHVSVSLRSTPALLPRLQGSSRFQSQVFKVNAQLNEEVPKTEYSIPDASSIQAFMSQAADLVELVDSRDIVELQLKQKDCEILIRKKAALPQPPVVMAPPSVQQGFYQPQLPPASAPAPAAPAAPALPPPVPSKPKSSHPPMKCPMAGTFYRSPAPGAPPFVKVGDKVQKGQVVCIIEAMKLMNEIEADSSGTIVEIIADDGKPVSVDTPLFVIEP	2	2	3	3	3	2	2	2	1
NbS00014110g0005.1 protein AED:0.34 eAED:0.34 QI:0|0|0|0.5|1|1|2|0|66; (*GB) gi|225439342|ref|XP_002270170.1| (e_value=7e-38) PREDICTED: ubiquitin-40S ribosomal protein S27a isoform 1 [Vitis vinifera];; (*SWP) sp|P62981|RS27A_SOLTU (e_value=1e-36) Ubiquitin-40S ribosomal protein S27a OS=Solanum tuberosum GN=UBI3 PE=2 SV=2;; (*TAIR) AT2G47110.2 (e_value=8e-34) | Symbols: UBQ6 | ubiquitin 6 | chr2:…	MVNRGIPVKLAVLQFYKVDDSGKVQRLRKECPNAECGAGTFMANHFDRHYCGKCGLTYVYQKAGGD	4	0	0	0	0	0	0	0	1
NbS00031756g0004.1 protein AED:0.34 eAED:0.34 QI:0|0.25|0|0.6|0.75|0.6|5|0|263; (*GB) gi|162464180|ref|NP_001105391.1| (e_value=3e-102) 40S ribosomal protein S8 [Zea mays];; (*SWP) sp|Q08069|RS8_MAIZE (e_value=9e-104) 40S ribosomal protein S8 OS=Zea mays GN=RPS8 PE=2 SV=2;; (*TAIR) AT5G59240.1 (e_value=1e-94) | Symbols: | Ribosomal protein S8e family protein | chr5:23902626-23903670 REVERSE LENGT…	MGISRDSMHKRRATGGKKKAWRKKRKYELGRQPANTKISANKTVRRIRVRGGNVKWRALRLDTGNYSWGSEAVTRKTRILDVVYNASNNELVRTWRALRLDTGNYSWGSEAVTRKTRILDVVYNASNNELVRTQTLVKSAIVQVDAAPFKQWYLQHYGVDIGRKKKGPAKKETTEEGEGAAAAAEETKKSNHVLRKIETRQKDRKLDPHIEEQFGGGRLLACISSRPGQCGRADGYILEGKELEFYMKKLQKKKGKAGAGGTA	3	1	0	0	1	0	0	0	0
NbS00021275g0005.1 protein AED:0.12 eAED:0.14 QI:0|0.33|0.25|1|1|0.5|4|0|277; (*GB) gi|357468831|ref|XP_003604700.1| (e_value=4e-94) Ribosomal protein S8 [Medicago truncatula];; (*SWP) sp|Q08069|RS8_MAIZE (e_value=3e-71) 40S ribosomal protein S8 OS=Zea mays GN=RPS8 PE=2 SV=2;; (*TAIR) AT5G59240.1 (e_value=3e-66) | Symbols: | Ribosomal protein S8e family protein | chr5:23902626-23903670 REVERSE LE…	YELGRQPANTKISANKTVRRIRVRGGNVKWRALRLDTGNYSWGSEAVTRKTRILDVVYKIGYRKLFMGEAVTRKTRILDVVYNASNNELVRTQTLVKSAIVQVDAAPFKQWYLQHYGVDIGRKKKGPAKKETTEEGEGAAAAAEETKKSNHVLRKIETRQKDRKLDPHIEEQFGGGCWPVSPAKKETTEEGEGAAAAAEETKKSNHVLRKIETRQKDRKLDPHIEEQFGGGRLLACISSRPGQCGRADGYILEGKELEFYMKKLQKKKGKAGAGGAA	3	0	0	3	0	0	0	4	0
NbS00018934g0115.1 protein AED:0.16 eAED:0.16 QI:206|1|1|1|1|1|10|411|569	MLRIWTRRLASECSISRRIYPGSFISTRNSSMGILPDTLDRSSESYSRNSKVMDGLVSQLHSHIRKVMEGGGAEAVKRHRSRDKLLPRERIERLIDPGSSFLELSQLAGHELYQESLPSGGIIIGIGTIHGRLCMLVANDPTVKGGSYFPITVKKHLRAQEIAAQCNLPCIYLVDSGGAFLPKQAEVFPDKENFGRVFYNQAVMSSEGIPQIALVLGSCTAGGAYIPAMADESVMVKGNGTIFLAGPPLVKAATGEEVSAEDLGGATVHCKTSGVSDYFAHDELHALAIGRNIVKNLHMAGGPEASGQTRADYKEPLYDVKELRTIAPTDLKQPFDVRSVIARIVDGSEFDEFKKLYGTTLVTGFGRICGQPVGILGNNGILFNESAQKGAHFIELCAQ…	1	8	7	7	9	3	14	5	7
NbS00001169g0153.1 protein AED:0.25 eAED:0.25 QI:0|0.5|0.4|1|1|1|5|0|341	MASAALSVANSSLQVSNRGFSEFSGLRTSSAIPFGRKTNDDLLSVVAFQTSVIGGGNNKRGVVEAKLKVAINGFGRIGRNFLRCWHGRKDSPLDVIAINDTGGVKQASHLLKYDSTLGIFDADVKPVGTDGISVDGKVIQVVSDRNPVNLPWGEGAGKHIQAGAKKVLITAPGKGIIKGTMTTTHSYTGDQRLLDASHRDLRRARAAALNIVPTSTGAAKAVALVLPSLKGKLNGIALRVPTPNVSVVDLVVQVSKKTFAEEVNAAFREAADKELKGILDVCDEPLVSVDFRCSDVSSTVDASLTMVMGDDMVKVIAWYDNEWGYSQRVVDLADIVANQWK	0	9	9	10	7	1	8	10	2
sp|P22629|SAV_STRAV Streptavidin OS=Streptomyces avidinii PE=1 SV=1	MRKIVVAAIAVSLTTVSITASASADPSKDSKAQVSAAEAGITGTWYNQLGSTFIVTAGADGALTGTYESAVGNAESRYVLTGRYDSAPATDGSGTALGWTVAWKNNYRNAHSATTWSGQYVGGAEARINTQWLLTSGTTEANAWKSTLVGHDTFTKVKPSAASIDAAKKAGVNNGNPLDAVQQ	0	9	9	0	9	0	8	0	0
NbS00006464g0001.1 protein AED:0.20 eAED:0.29 QI:848|0.75|0.8|1|0.25|0.2|5|200|374; (*GB) gi|8928423|sp|Q9ZPN7.1|TBB4_ELEIN (e_value=0.0) RecName: Full=Tubulin beta-4 chain; AltName: Full=Beta-4-tubulin;; (*SWP) sp|Q9ZPN7|TBB4_ELEIN (e_value=0.0) Tubulin beta-4 chain OS=Eleusine indica GN=TUBB4 PE=2 SV=1;; (*TAIR) AT5G12250.1 (e_value=0.0) | Symbols: TUB6 | beta-6 tubulin | chr5:3961317-3962971 R…	MREILHIQGGQCGNQIGSKFWEVVCDEHGIDPTGRYVGTSDLQLERVNVYYNEASCGRFVPRAVLMDLEPGTMDSVRTGPYGQIFRPDNFVFGQSGAGNNWAKGHYTEGAELIDSVLDVVRKEAENCDCLQGFQVCHSLGGGTGSGMGTLLISKIREEYPDRMMLTFSVFPSPKVSDTVVEPYNATLSVHQLVENADECMVLDNEALYDICFRTLKLTTPSFGDLNHLISATMSGVTCCLRFPGQLNSDLRKLAVNLIPFPRLHFFMVGFAPLTSRGSQQYRALTVPELTQQMWDAKNMMCAADPRHGRYLTASAMFRGKMSTKEVDEQMINVQNKNSSYFVEWIPNNVKSSVCDIWHPPSLETQLPFRKCLGG	0	5	5	3	4	0	3	3	0
NbS00011572g0004.1 protein AED:0.30 eAED:0.30 QI:251|1|0.94|1|0.93|0.88|17|21|565; (*GB) gi|380853844|gb|AFE88229.1| (e_value=0.0) acetyl-CoA carboxylase [Nicotiana tabacum];; (*SWP) sp|B9HBA8|ACCC1_POPTR (e_value=0.0) Biotin carboxylase 1, chloroplastic OS=Populus trichocarpa GN=POPTRDRAFT_831870 PE=2 SV=1;; (*TAIR) AT5G35360.1 (e_value=0.0) | Symbols: CAC2 | acetyl Co-enzyme a carboxylase bioti…	MDSAALTSVCGKSALRSTPGLFLGRTNGIRSSQCSFMAGNKINFPRQRAQAYRVSTKSSKRGSALAATCRINFPRQRAQAYRVSTKSSKCGGALAATCRAEKILVANRGEIAVRVIRTAHEMGIPCVAVYSTIDKDALHVKLADESVCIGEAPSNQSYLVIPNVLSAAISRGCTMLHPGYGFLSENAVFVEMCREHGINFIGPNPDSIRVMGDKSTARDTMKNAGVPTVPGSDGLLQSTEEGVRLAEEIGYPVMIKATAGGGGRGMRLAKEPDEFVKLLQQAKSEAAAAFGNDGVYLEKYVQNPRHIEFQVLADKYGNVVHFGERDCSIQRRNQKLLEEAPSPALTPELRNAMGDAAVAAAASIGYIGVGTMEFLLDERGSFYFMEMNTRIQVEHPVTE…	0	5	6	3	5	0	5	4	5
NbS00001859g0006.1 protein AED:0.10 eAED:0.10 QI:0|0.42|0.5|1|0.85|0.75|8|0|558; (*GB) gi|313585890|gb|ADR71054.1| (e_value=0.0) phosphoglycerate kinase [Nicotiana benthamiana];; (*SWP) sp|Q42961|PGKH_TOBAC (e_value=0.0) Phosphoglycerate kinase, chloroplastic OS=Nicotiana tabacum PE=2 SV=1;; (*TAIR) AT1G56190.1 (e_value=0.0) | Symbols: | Phosphoglycerate kinase family protein | chr1:21028403-2103…	MASATASHSLCGIPATSSSTTNKSIAPSSARFLAKTPPRGLGFAGAAADSLFTNHVATKLRSLKSSSKPVRGVASMAKKSVGDLTAAELKGKNVFVRADLNVPLDDNQNITDDTRIRAAVPTIKHLMANGAKVILSSHLGRPKGVTPKYSLAPLVPRLSELLGIQVVKAEDCIGPEVEKLVASLPEGGVLLLENVRFYKEEEKNEPEFAKKLASLADLYVNDAFGTAHRAHASTEGVTKFLKPSELDYLVGAVSNPKRPFAAIVGGSKVSSKIGVIESLLEKCDILLLGGGMIFTFYKAQGLSVGSSLVEEDKLELATSLLEKAKAKGVSLLLPSDVVIADKFAPDANSKSLLLMDCVENAILFWLLQIVPASAIPDDGWMGLDIGPDSVKTFNDALDT…	0	4	2	0	2	0	3	0	0
NbS00005183g0002.1 protein AED:0.18 eAED:0.18 QI:0|0.69|0.57|0.92|1|1|14|0|607; (*GB) gi|1762130|gb|AAB39827.1| (e_value=0.0) chaperonin-60 beta subunit [Solanum tuberosum];; (*SWP) sp|P08927|RUBB_PEA (e_value=0.0) RuBisCO large subunit-binding protein subunit beta, chloroplastic OS=Pisum sativum PE=1 SV=2;; (*TAIR) AT3G13470.1 (e_value=0.0) | Symbols: | TCP-1/cpn60 chaperonin family protein | ch…	MASTFAGMSSAGPLAAPSTSSNKLSSVANISSSSFGSRRNVVLRKARSSKISAAAKELYFNKDGSAIKRLQVGMNKLADLVGVTLGPKGRNVVLESKYGAPKIVNDGVTVAREVELEDPVENIGAKLVRQAAAKTNDLAGDGTTTSVVLAQGLVAEGVKVVAAGANPVLITRGIEKTTKALVAELKNMSKEKGVVNLEEGKSAENSLRVVEGMQFDRGYISPYFVTDSEKMSVEYENCKVGILLPSAENSLRVAEGMQFDRGYISPYFVTDSEKMSVEYKNCKLLLVDKKITNARDLVGVLEDAIRNGYPILIIAEDIEQEALATLVVNKLRGALKVAALKAPGFGERKSQYLDDIATLTGGTVIRDELGLTLDKADKEVLGHASKVVLTKDATTIVGD…	0	4	2	0	3	0	5	0	0
NbS00005925g0010.1 protein AED:0.29 eAED:0.29 QI:29|0.87|0.66|0.88|0.75|0.88|9|0|286; (*GB) gi|359486366|ref|XP_002278151.2| (e_value=3e-92) PREDICTED: biotin carboxyl carrier protein of acetyl-CoA carboxylase-like [Vitis vinifera];; (*TAIR) AT3G56130.1 (e_value=6e-63) | Symbols: | biotin/lipoyl attachment domain-containing protein | chr3:20826852-20829007 FORWARD LENGTH=281;; (*ITAG) Solyc06g050…	MESAAVLRSFHLGNTSHMMSVIEMPGVIPMNNVGFSKPTKFPLMGSSNGAKLMSSTNKHSRLILSCAKTSETTVTAKSDDSHQKVSTEKSPLPTATFPKGFEALITEVCDDTEVAELKLKIGDFELHLKRDIEAPMVPAPVVSSPPPPPPSASKPSTASTAASPATSPGKSSSEKISPFTNVAAEKSAKLAALETSGASGYVLVSCPTVGSFRRARTLKGKKQPPACKEGDVIKEGQIIGFLDQFGTELPVRSDAAGELLKILFNDGEAVGYGDPLIAVLPSFRGI	0	4	3	3	5	0	3	5	1
NbC24872723g0001.1 protein AED:0.03 eAED:0.04 QI:0|-1|0|1|-1|1|1|0|212; (*GB) gi|161702915|gb|ABX76298.1| (e_value=2e-118) sexual organ expressed protein [Nicotiana alata];; (*SWP) sp|P58515|SPI2_SOLTU (e_value=1e-32) Serine protease inhibitor 2 OS=Solanum tuberosum PE=1 SV=1;; (*TAIR) AT1G17860.1 (e_value=4e-20) | Symbols: | Kunitz family trypsin and protease inhibitor protein | chr1:6149343-614…	TSTNPIVLPTTTDDDKGLPIPRFPEVLDINGEPLHVGERYQIISAIPGAGGGGVFLTFVRNTKCPNGVFQHGKDSLPGMPVKFVTTHSRPFNVVLENTDINIMFSVATTRLCVNQTVWKVGDPDLTARGTRFVLTGGTLGNLRPEKIDSWFKIERVSRQGPFYKLRYCPATIHSRPVVCSDVGVTDYFGFRRLTLTNQPFIVFFRKFQNTDG	0	3	3	1	4	2	0	1	0
NbS00020069g0017.1 protein AED:0.25 eAED:0.25 QI:293|1|0.95|1|0.90|1|22|0|1139; (*GB) gi|193290694|gb|ACF17655.1| (e_value=0.0) putative ferredoxin-dependent glutamate synthase 1 [Capsicum annuum];; (*SWP) sp|Q9ZNZ7|GLTB1_ARATH (e_value=0.0) Ferredoxin-dependent glutamate synthase 1, chloroplastic OS=Arabidopsis thaliana GN=GLU1 PE=1 SV=2;; (*TAIR) AT5G04140.1 (e_value=0.0) | Symbols: GLU1, GLS1,…	MAVNSVANVRQLLYANGQSPKIVAGSKGGVFVDFFGLYCKSSKRVRRRIGYTAANRRSLVNNKLNAINAAFDLERVATNASQQSSDIVPKVADLDDIISERGACGVGFIANLDNKASHGIVKDALVALGCMEHRGGCGADNDSGDGSGVMTSIPWDLVNDWAKKEGIAVFDKLHTGVGMIFLPKDCNQMNEAKKVISNIFNNEGLEVLGWRPVPVDSSVVGYYAKETMPNIQQVFVRIVKEENVDDIERELYICRKLIERAVNSEIWGNELYFCSLSNQTIVYKGMLRSEVLGRFYYDLQSELYTSPFAIYHRRFSTNTSPRWPLAQPMRFLGHNGEINTIQGNLNWMQSREASLKSTVWRDRENEIRPFGNPKASDSANLDSAAELLIRSGRAPEEAL…	0	3	2	3	2	0	1	1	0
NbS00033391g0006.1 protein AED:0.14 eAED:0.14 QI:195|0.85|0.87|1|0.85|1|8|383|567; (*GB) gi|359479362|ref|XP_002277357.2| (e_value=0.0) PREDICTED: ruBisCO large subunit-binding protein subunit alpha, chloroplastic-like [Vitis vinifera];; (*SWP) sp|P08926|RUBA_PEA (e_value=0.0) RuBisCO large subunit-binding protein subunit alpha, chloroplastic OS=Pisum sativum PE=1 SV=2;; (*TAIR) AT2G28000.1 (e_va…	MASANAISTASIIPSPSKQGALKNRRVNQLQGQKFSNRSAKNNRFVVKACAKEIAFDQKSRSALQAGIDKLADAVGLTLGPRGRNVVLDEYGTPKVVNDGVTIARAIELPDAMENAGAALIREVASKTNDSAGDGTTTASVLAREIIKLGLLSVTSGANPVSLKKGIDKTVLGLIEELEKKARPVKGRDDIKAIASISAGNDESIGTMIADAIDKVGPDGVLSIESSSSFETTVHVEEGMEIDRGYISPQFVTNPEKLIVEFENARVLVTDQKISAIKDIIPLLEKTTQLRSPLLIIAEDVTGEALATLVVNKLRGILNVAAIKAPGFGERRKALLQDIAIVTGAEYQATDLGLLIEGTPVEALGIARKVTITKDSTTIIADAASKDEIQARIAQLKKE…	0	3	3	3	2	0	4	4	0
NbC25292626g0004.1 protein AED:0.08 eAED:0.08 QI:0|1|0.5|1|1|1|4|0|159; (*GB) gi|132118|sp|P26573.1|RBS8_NICPL (e_value=2e-112) RecName: Full=Ribulose bisphosphate carboxylase small chain 8B, chloroplastic; Short=RuBisCO small subunit 8B; Flags: Precursor;; (*SWP) sp|P26573|RBS8_NICPL (e_value=7e-114) Ribulose bisphosphate carboxylase small chain 8B, chloroplastic OS=Nicotiana plumbaginifolia GN=…	MVAPFTGLKSAASFPVSRKQNLDITSIASNGGRVQCMQVWPPINMKKYETLSYLPDLSQEQLLSEIEYLLKNGWVPCLEFETEKGFVYREHHKSPGYYDGRYWTMWKLPMFGCTDATQVLAEVGEAKKEYPQAWVRIIGFDNVRQVQCISFIASKPDGY	0	2	2	2	0	0	1	0	0
NbS00000058g0018.1 protein AED:0.02 eAED:0.02 QI:0|1|0|1|1|1|2|0|221; (*GB) gi|30013659|gb|AAP03872.1| (e_value=2e-130) putative photosystem I subunit III precursor [Nicotiana tabacum];; (*SWP) sp|P46486|PSAF_FLATR (e_value=4e-105) Photosystem I reaction center subunit III, chloroplastic OS=Flaveria trinervia GN=PSAF PE=2 SV=1;; (*TAIR) AT1G31330.1 (e_value=2e-99) | Symbols: PSAF | photosystem I …	MSLTIPTNLSKPISTVNSQFTKKPRFATIVCSSSSADEKSSCNLKAFSAALALSSVLLSVPALPASADISGLTPCKESKQFAKREKQQIKKLESSLKLYAPDSAPALAIKATVEKTKRRFDNYGKQGLLCGSDGLPHLIVSGDQRHWGEFITPGILFLYIAGWIGWVGRSYLIAVRDDKKPTMKEIIIDVPLANKLIWRGFSWPVAAYREYLNGELIDPNF	0	2	2	0	1	0	2	1	1
NbS00000250g0010.1 protein AED:0.23 eAED:0.23 QI:0|0.83|0.78|0.89|0.77|0.78|19|437|448; (*GB) gi|238814974|gb|ACR56690.1| (e_value=0.0) enolase [Nicotiana tabacum];; (*SWP) sp|P26300|ENO_SOLLC (e_value=0.0) Enolase OS=Solanum lycopersicum GN=PGH1 PE=2 SV=1;; (*TAIR) AT2G36530.1 (e_value=0.0) | Symbols: LOS2, ENO2 | Enolase | chr2:15321081-15323786 REVERSE LENGTH=444;; (*ITAG) Solyc09g009020.2.1 (…	MATIKSVKARQIFDSRGNPTVEVDVTLSNGVFARAAVPSGASTGIYEALELRDGGSEYLGKGVSKAVNNVNSIIGPALIGKDATDQTALDNFMVHELDGTQNEWGWCKQKLGANAILAVSLAVCKAGAAARNVPLYKHIADLAGNKKLVLPVPAFNVINGGSHAGNKLAMQEFMILPTGASSFKEAMKMGCEVYHHLKAVIKKKYGQDATNVGDEGGFAPNIQENKEGLELLKTAIEKAGYTGKVVIGMDVAASEFFLKDKSYDLNFKEEASSHNNDGSQKISGDQLKDLYKTFVSEYPIVSIEDPFDQDDWETYAKLTTEMGEQVQIVGDDLLVTNPKRVAKAIAEKTCNALLLKVNQIGSVTESIEAVKMSKRAGWGVMTSHRSGETEDTFIADLAV…	0	2	3	0	1	0	5	1	0
NbS00004081g0106.1 protein AED:0.15 eAED:0.16 QI:0|1|0.75|1|1|1|4|0|260	MAVAPTAREENVYMAKLAEQAERYEEMVEFMEKVSNSLGSEELTVEERNLLSVAYKNVIGARRASWRIISSIEQKEESRGNEEHVNSIREYRSKIENELSKICDGILKLLDAKLIPSAASGDSKVFYLKMKGDYHRYLAEFKTGAERKEAAESTLTAYKAAQDIATTELAPTHPIRLGLALNFSVFYYEILNSPDRACNLAKQAFDEAIAELDTLGEESYKDSTLIMQLLRDNLTLWTSDMQDDGADEIKEDPKPDEAKN	0	2	1	0	1	0	0	0	0
NbS00004717g0103.1 protein AED:0.03 eAED:0.03 QI:0|-1|0|1|-1|1|1|0|128	MANFSTIFILSLLLVATFTAACGPCSEPMKPKPSPKKAPPANPFCPRDTLKLGVCADVLGLVNVAVGSQVTSPCCSLLQGLADLEVAACLCTAIKANVLGIVKLDIPVALSALVSACAKTIPTGFKCN	0	2	2	1	2	0	1	0	0
NbS00007414g0017.1 protein AED:0.42 eAED:0.42 QI:0|0.33|0|0.75|0.66|0.5|4|0|248; (*GB) gi|350538011|ref|NP_001234322.1| (e_value=4e-42) biotin carboxylase carrier protein [Solanum lycopersicum];; (*TAIR) AT5G15530.1 (e_value=8e-25) | Symbols: BCCP2, CAC1-B | biotin carboxyl carrier protein 2 | chr5:5038955-5040437 FORWARD LENGTH=255;; (*ITAG) Solyc05g056290.2.1 (e_value=8e-45) genomic_reference:S…	GLQTGRNHSAVVRAQLNEVRFFQWFSLEEILSNFVSFVKNLLEPSVAFKVAVGGSSNDAATPITQLEEVKSPSETSSATPRLFMNSHTVKSPSETSSATSVSEESISNFISQVSSLVKLVDSRDVVELHLKQLDCEILIRKKEALPQPPPPAPAHTQLLQSYHVPSVQSSPPPAPASAAPPVQIPAPSPAAAKPSDSSVPPLKCPMAGTFYRSPGPGEPPFVKVLHVCLLRTIIDVLAEDGKPVSVDM	0	2	2	3	0	0	0	3	0
NbS00008675g0003.1 protein AED:0.03 eAED:0.03 QI:0|0|0|1|1|1|2|0|492; (*GB) gi|75216452|sp|Q9ZS34.1|CHLP_TOBAC (e_value=0.0) RecName: Full=Geranylgeranyl diphosphate reductase, chloroplastic; AltName: Full=Geranylgeranyl reductase; Flags: Precursor;; (*SWP) sp|Q9ZS34|CHLP_TOBAC (e_value=0.0) Geranylgeranyl diphosphate reductase, chloroplastic OS=Nicotiana tabacum GN=CHLP PE=2 SV=1;; (*TAIR) AT1G7…	MASIALKTFTGLRKSSPENNAITLSKSLPLTQNHRRLRINASKSSPRVNGRNLRVAVVGGGPAGGAAAETLAKGGIETFLIERKMDNCKPCGGAIPLCMVGEFDLPLDIIDRKVTKMKMISPSNVAVDIGQTLKPHEYIGMVRREVLDAYLRDRAAEAGASVLNGLFLKMDMPKATNAPYVLHYTAYDSKTNGAGEKRTLEVDAVIGADGANSPYDSKTNGAGEKRTLEVDAVIGADGANSRVAKSINAGDYEYAIAFQERIRISDDKMKYYENLAEMYVGDDVSPDFYGWVFPKCDHVAVGTGTVTHKADIKKFQLATRLRADSKITGGKIIRVEAHPIPEHPRPRRLQDRVALVGDAAGYVTKCSGEGIYFAAKSGRMCAEAIVEGSEMGKRMVDES…	0	2	1	0	1	0	1	0	0
NbS00013023g0001.1 protein AED:0.21 eAED:0.21 QI:0|1|0.66|1|1|1|3|0|406; (*GB) gi|1707878|sp|P54260.1|GCST_SOLTU (e_value=0.0) RecName: Full=Aminomethyltransferase, mitochondrial; AltName: Full=Glycine cleavage system T protein; Short=GCVT; Flags: Precursor;; (*SWP) sp|P54260|GCST_SOLTU (e_value=0.0) Aminomethyltransferase, mitochondrial OS=Solanum tuberosum GN=GDCST PE=2 SV=1;; (*TAIR) AT1G11860…	MRGGLWQLGQSITRRLAQAEKKTIGRRCFASDADLKKTVLYDFHVVNGGKMVPFAGWSMPIQYKDSIMDSTINCRENGSLFDVAHMCGLSLKGKDAIPFLEKLVIADVAGLAPGTGTLTVFTNEKGGAIDDSVITKVTNDHLYLVVNAGCRDKDLAHIEEHMKSFKSKGGDVSWHIHDERSLLALQGPLAAPVLQHLTKDDLSKMYFGEFRVLDINGASCFLTRTGYTGEDGFEISVPSENAVDLAKAILEKSEGKVRLTGLGARDSLRLEAGLCLYGNDMEQHITPVEAGLTWAIGKRRRAEGGFLGAEVILKQIEEGPKIRRVGFFSSGPPPRSHSEIQDSNGQNIGEITSGGFSPCLKKNIAMGYVKTGNHKAGTNVKIVIRGKSYDGAVTKMPFA…	0	2	3	1	2	0	1	1	0
NbS00016136g0003.1 protein AED:0.24 eAED:0.24 QI:0|0|0|1|1|1|3|0|533; (*GB) gi|392465167|dbj|BAM24707.1| (e_value=0.0) Heat shock protein 70 [Nicotiana tabacum];; (*SWP) sp|P27322|HSP72_SOLLC (e_value=0.0) Heat shock cognate 70 kDa protein 2 OS=Solanum lycopersicum GN=HSC-2 PE=2 SV=1;; (*TAIR) AT5G02500.1 (e_value=0.0) | Symbols: HSC70-1, HSP70-1, AT-HSC70-1, HSC70 | heat shock cognate protein 70…	RQATKDAGVIAGLNVLRIINEPTAAAIAYGLDKKATSVGEKNVLIFDLGGGTFDVSLLTIEEGIFEVKATAGDTHLGGEDFDNRMVNHFVQEFKRKNKKDISGNPRALRRTLSSTAQTTIEIDSLYEGIDFYSTITRARFEELNMDLFRKCMEPVEKCLRDAKMDKSTIHDVVLVGGSTRIPKVQQLLQDFFNGKELCKSINPDEAVAYGAAVQAAILSGEGNEKVQDLLLLDVTPLSLGLETAGGVMTVLIPRNTTIPTKKEQVFSTYSDNQPGVLIQVYEGERTRTRDNNLLGKFELSGIPPAPRGVPQITVCFDIDANGILNVSAEDKTTGQKNKITITNDKGRLSKEEIEKMVQEAEKYKSEDEEHKKKVEAKNALENYAYNMRNTVKDEKIASK…	0	2	9	1	3	0	3	0	0
NbS00016159g0006.1 protein AED:0.34 eAED:0.36 QI:356|0.57|0.5|1|0.71|0.62|8|0|302; (*GB) gi|115473|sp|P27141.1|CAHC_TOBAC (e_value=3e-179) RecName: Full=Carbonic anhydrase, chloroplastic; AltName: Full=Carbonate dehydratase; Flags: Precursor;; (*SWP) sp|P27141|CAHC_TOBAC (e_value=1e-180) Carbonic anhydrase, chloroplastic OS=Nicotiana tabacum PE=2 SV=1;; (*TAIR) AT3G01500.3 (e_value=9e-122) | Symb…	MSTASINSCLTISPAQASLKKPTRPVAFARVSNSSSSPFVPSLIRNEPVFAAPTPIINPILSMYFNILVLNIGNYDNSEKGELGPIAAARVDQITAELQSSDGSKPFDPVEHMKAGFIHFKTEKYEKNPALYGELSKGQSPKYMVFACSDSRVCPSHILNFQPGEAFVVRNIANMVPAYDKTRYSGVGAAIEYAVLHLKVENIVVIGHSACGGIKGLMSLPADGSESTAFIEDWVKIGLPAKAKVQGDHEAVNVSLGNLLTYPFVREGLVKKTLALKGGHYDFVNGGFELWGLEFGLSPSLS	0	2	3	1	1	0	1	0	0
NbS00017698g0005.1 protein AED:0.21 eAED:0.23 QI:0|0.2|0|0.66|1|1|6|0|416; (*GB) gi|324331817|gb|ADY38689.1| (e_value=0.0) actin [Camellia sinensis];; (*SWP) sp|P30171|ACT11_SOLTU (e_value=0.0) Actin-97 OS=Solanum tuberosum GN=AC97 PE=3 SV=1;; (*TAIR) AT5G09810.1 (e_value=0.0) | Symbols: ACT7 | actin 7 | chr5:3052809-3054220 FORWARD LENGTH=377;; (*ITAG) Solyc04g011500.2.1 (e_value=0.0) genomic_re…	MAEGEDIQPLAGFAGDDAPRAVFPSIVGRPRHTGVMVGMGQKDAYVGDEAQSKRGILTLKYPIEHGIVSNWDDMEKIWHHTFYNELRVAPEEHPVLLTEAPLNPKANREKMTQIMFETFNTPAMYVAIQAVLSLYALLTEAPLNPKANREKMTQIMFETFNTPAMYVAIQAVLSLYASGRTTGIVLDSGDGVSHTVPIYEGYALPHAILRLDLAGRDLTDSLMKILTERGYSFTTTAEREIVRDVKEKLAYTDVKEKLAYIALDYEQELETSKTSSSVEKSYELPDGQVITIGAERFRCPEVLFQPSMIGMEAAGIHETTYNSIMKCDVDIRKDLYGNIVLSGGSTMFPGIADRMSKEITALAPSSMKIKVVAPPERKYSVWIGGSILASLSTFQQMWI…	0	2	4	0	3	0	2	0	0
NbS00017897g0003.1 protein AED:0.00 eAED:0.00 QI:176|0|0.5|1|0|0.5|2|349|129; (*GB) gi|118488240|gb|ABK95939.1| (e_value=2e-36) unknown [Populus trichocarpa];; (*SWP) sp|P14009|14KD_DAUCA (e_value=4e-29) 14 kDa proline-rich protein DC2.15 OS=Daucus carota PE=2 SV=1;; (*TAIR) AT2G45180.1 (e_value=1e-32) | Symbols: | Bifunctional inhibitor/lipid-transfer protein/seed storage 2S albumin superfamily …	MANFSSTIFILSLLLVATFTAACGPCSEPIKPKPSPKKAPPANPFCPRDTLKLGVCADVLGLVNVAIGSQVTSPCCSLLQGLADLEVAACLCTAIKANVLGIVKLDIPVALSALVSACAKTIPTGFKCN	0	2	2	1	2	0	1	0	0
NbS00018180g0004.1 protein AED:0.16 eAED:0.16 QI:0|1|0.66|1|1|1|3|0|168; (*GB) gi|270311593|gb|ACZ72945.1| (e_value=6e-100) photosystem I reaction center subunit [Nicotiana tabacum];; (*SWP) sp|P49107|PSAN_ARATH (e_value=9e-68) Photosystem I reaction center subunit N, chloroplastic OS=Arabidopsis thaliana GN=PSAN PE=1 SV=2;; (*TAIR) AT5G64040.1 (e_value=6e-69) | Symbols: PSAN | photosystem I reac…	MAAMNSSVLACSYAVSGIGASELTSKHASMASQSVQKWPVIKAQQSKVLDSEANKNQAGRRIALLGLAAALFTAASSNSSANAGVIDDYLEKSKANKELNDKKRLATSGANFARAYTVQFGTCKFPENFTGCQDLAKQKKVPFISDDLALECEGKDKYKCGSNVFWKW	0	2	2	1	1	0	2	3	0
NbS00022486g0001.1 protein AED:0.21 eAED:0.21 QI:0|1|0.66|1|1|1|3|0|181; (*GB) gi|132118|sp|P26573.1|RBS8_NICPL (e_value=4e-116) RecName: Full=Ribulose bisphosphate carboxylase small chain 8B, chloroplastic; Short=RuBisCO small subunit 8B; Flags: Precursor;; (*SWP) sp|P26573|RBS8_NICPL (e_value=1e-117) Ribulose bisphosphate carboxylase small chain 8B, chloroplastic OS=Nicotiana plumbaginifolia GN…	MASSVMSSAAAVATGANAAQASMVAPFTGLKSATSFPVSRKQNLDITSIASNGGRVQCMQVWPPINKKKYETLSYLPDLSQEQLLSEVEYLLKNGWVPCLEFETERGFVYREHHSSPGYYDGRYWTMWKLPMFGCTDATQVLAEVEEAKKAYPQAWVRIIGFDNVRQVQCISFIAYKPEGY	0	2	1	0	2	0	1	0	0
NbS00025736g0004.1 protein AED:0.28 eAED:0.28 QI:605|0.91|0.84|1|0.83|0.76|13|359|356; (*GB) gi|304368145|gb|ADM26718.1| (e_value=0.0) glycolate oxidase [Nicotiana benthamiana];; (*SWP) sp|P05414|GOX_SPIOL (e_value=0.0) Peroxisomal (S)-2-hydroxy-acid oxidase OS=Spinacia oleracea PE=1 SV=1;; (*TAIR) AT3G14420.2 (e_value=0.0) | Symbols: | Aldolase-type TIM barrel family protein | chr3:4821804-48238…	MEEVTNVMEYEAIAKKKLPKMVFDYYASGAEDQWTLAENRNAFSRILFRPRILIDVSKIDMSTTVLGFKISMPIMIAPTAMQKMAHPEGEYATARAASAAGTIMTLSSWATSSVEEVASTGPGIRFFQLYVYKDRNVVAQLVRRAERAGFKAIALTVDTPRLGRREADIKNRFVLPPFLTLKNFEGLDLGKMDQASDSGLASYVAGQIDRTLSWKDVQWLQTITSLPILVKGVLTAEDARLAVQAGAAGIIVSNHGARQLDYVPSTIMALEEVVKAAQGRIPVFLDGGVRRGTDVFKALALGASGIFIGRPVVFSLAAEGEAGIKKVGCRSLNEITRNHIVTEWDAPRAALPAPRL	0	2	4	1	3	0	2	0	0
NbS00029684g0026.1 protein AED:0.02 eAED:0.02 QI:225|1|0.87|1|1|1|8|0|707; (*GB) gi|166919372|gb|ABZ04081.1| (e_value=0.0) chloroplast heat shock protein 70-2 [Ipomoea nil];; (*SWP) sp|Q02028|HSP7S_PEA (e_value=0.0) Stromal 70 kDa heat shock-related protein, chloroplastic OS=Pisum sativum GN=HSP70 PE=2 SV=1;; (*TAIR) AT4G24280.1 (e_value=0.0) | Symbols: cpHsc70-1 | chloroplast heat shock protein …	MASSTAQIHALGATYFTTSSSSGRKPSKTVFLGQNLNKRTLAFGLKQKKSSSSRRNGGGHAPLRVVAEKVVGIDLGTTNSAVAAMEGGKPTIVTNAEGQRTTPSVVAYTKNGDRLVGQIAKRQAVVNPENTFFSVKRFIGRKMNEVDEESKQVSYNVIRDENGNVKLDCPAIGKSFAAEEISAQVLRKLVDDASKFLNDKVSKAVVTVPAYFNDSQRTATKDAGRIAGLEVLRIINEPTAASLAYGFEKKNNETILVFDLGGGTFDVSVLEVGDGVFEVLSTSGDTHLGGDDFDKRIVDWLASEFKKNEGIDLLKDKQALQRLTETAEKAKMELSSLTQTNISLPFITATADGPKHIETTITRGKFEELCSDLLDRLKTPVQNSLRDAKLSFSDIDEVI…	0	2	2	0	1	0	2	0	0
NbS00038282g0004.1 protein AED:0.16 eAED:0.16 QI:0|1|0.66|1|1|1|3|0|168; (*GB) gi|270311593|gb|ACZ72945.1| (e_value=5e-95) photosystem I reaction center subunit [Nicotiana tabacum];; (*SWP) sp|P49107|PSAN_ARATH (e_value=3e-65) Photosystem I reaction center subunit N, chloroplastic OS=Arabidopsis thaliana GN=PSAN PE=1 SV=2;; (*TAIR) AT5G64040.1 (e_value=2e-66) | Symbols: PSAN | photosystem I react…	MAAMNSSVLACSYAVSGIGASELTSKHASMASQSVQKWPVIKAQQSKVLDSEANKNQAGRRIALIGLAAALFTAASSNSSANAGVIDDYLEKSKANKELNDKKRLATSGANFARAYTVQFGTCKFPENFTGCQDLAKQKKVPFISDDLALECEGKDKYKCGSNVFWKW	0	2	2	1	1	0	2	3	0
NbS00039057g0010.1 protein AED:0.31 eAED:0.31 QI:0|1|0.66|1|1|1|3|0|406; (*GB) gi|1707878|sp|P54260.1|GCST_SOLTU (e_value=0.0) RecName: Full=Aminomethyltransferase, mitochondrial; AltName: Full=Glycine cleavage system T protein; Short=GCVT; Flags: Precursor;; (*SWP) sp|P54260|GCST_SOLTU (e_value=0.0) Aminomethyltransferase, mitochondrial OS=Solanum tuberosum GN=GDCST PE=2 SV=1;; (*TAIR) AT1G11860…	MRGGLWQLGQSITRRLAQADKKTIGRRCFASDADLKKTVLYDFHVVNGGKMVPFAGWSMPIQYKDSIMDSTINCRENGSLFDVAHMCGLSLKGKDTIPFLEKLVIADVAGLAPGTGTLTVFTNEKGGAIDDSVITKVTNDHLYLVVNAGCRDKDLAHIEEHMKSFKSKGGDVSWHIHDERSLLALQGPLAAPVLQHLTKDDLSKMYFGEFRVLDINGASCFLTRTGYTGEDGFEISVPSENAVDLAKAILEKSEGKIRLTGLGARDSLRLEAGLCLYGNDMEQHITPVEAGLTWAIGKRRRAEGGFLGAEVILKQIEEGPKIRRVGFFSSGPPPRSHSEIQDSNGQNIGEITSGGFSPCLKKNIAMGYVKTGNHKAGTNVKIVIRGKSYDGAVTKMPFV…	0	2	3	1	2	0	1	1	0
NbS00042812g0008.1 protein AED:0.19 eAED:0.19 QI:0|1|1|1|1|1|4|386|180; (*GB) gi|132118|sp|P26573.1|RBS8_NICPL (e_value=3e-119) RecName: Full=Ribulose bisphosphate carboxylase small chain 8B, chloroplastic; Short=RuBisCO small subunit 8B; Flags: Precursor;; (*SWP) sp|P26573|RBS8_NICPL (e_value=8e-121) Ribulose bisphosphate carboxylase small chain 8B, chloroplastic OS=Nicotiana plumbaginifolia GN=…	MASSVLSSAAVATRSNVAQANMVAPFTGLKSAASFPVSRKQNLDITSIASNGGRVQCMQVWPPINMKKYETLSYLPDLSQEQLLSEIEYLLKNGWVPCLEFETEKGFVYREHHKSPGYYDGRYWTMWKLPMFGCTDATQVLAEVGEAKKEYPQAWVRIIGFDNVRQVQCISFIASKPDGY	0	2	2	2	0	0	1	0	0
NbS00044621g0001.1 protein AED:0.31 eAED:0.31 QI:0|-1|0|1|-1|1|1|0|172; (*GB) gi|169930141|gb|ACB05668.1| (e_value=4e-109) cyclophilin [Capsicum annuum];; (*SWP) sp|P21568|CYPH_SOLLC (e_value=7e-107) Peptidyl-prolyl cis-trans isomerase OS=Solanum lycopersicum GN=CYP PE=2 SV=1;; (*TAIR) AT2G21130.1 (e_value=5e-94) | Symbols: | Cyclophilin-like peptidyl-prolyl cis-trans isomerase family protein | c…	MANPKVFFDLTIGGTPAGRVVMELYADTVPKTAENFRALCTGEKGVGRMGKPLHYKGSTFHRVIPGFMCQGGDFTAGNGTGGESIYGAKFADENFKRKHTGPGILSMANAGPGTNGSQFFICTAKTEWLDGKHVVFGQVVEGYDVIKKAEAVGSGSGRCSKPVVIADCGQLC	0	2	0	0	1	0	2	0	0
NbS00052944g0006.1 protein AED:0.04 eAED:0.04 QI:222|0.75|0.66|1|0.75|0.77|9|0|727; (*SWP) sp|Q02028|HSP7S_PEA (e_value=0.0) Stromal 70 kDa heat shock-related protein, chloroplastic OS=Pisum sativum GN=HSP70 PE=2 SV=1;; (*TAIR) AT4G24280.1 (e_value=0.0) | Symbols: cpHsc70-1 | chloroplast heat shock protein 70-1 | chr4:12590094-12593437 FORWARD LENGTH=718;; (*ITAG) Solyc01g103450.2.1 (e_value=0.0)…	MASSTAQIHALGATYFTTSSSSSRKPSKTVFLGQNINNRTLAFGLKQKKSSFSRRNGGGHAPLRVVAEKVVGIDLGTTNSAVAAMEGGKPTIVTNAEGQRTTPSVVAYTKNGDRLVGQIAKRQAVVNPENTFFSVKRFIGRKMNEVDEESKQVSYNVIRDENGNVKLDCPAIGKSFAAEEISAQVLRKLVDDASKFLNDKVSKAVVTVPAYFNDSQRTATKDAGRIAGLEVLRIINEPTAASLAYGFEKKNNETILVFDLGGGTFDVSVLEVGDGVFEVLSTSGDTHLGGDDFDKVCMVLSTSGDTHLGGDDFDKRIVDWLASDFKKNEGIDLLKDKQALQRLTETAEKAKMELSSLTQTNISLPFITATADGPKHIETTITRGKFEELCSDLLDRLKT…	0	2	2	2	1	0	2	2	0
NbS00053747g0002.1 protein AED:0.05 eAED:0.05 QI:0|0.33|0.25|1|1|1|4|0|478; (*GB) gi|54288757|gb|AAV31754.1| (e_value=0.0) S-adenosyl-L-homocysteine hydrolase [Nicotiana tabacum];; (*SWP) sp|P68173|SAHH_TOBAC (e_value=0.0) Adenosylhomocysteinase OS=Nicotiana tabacum GN=SAHH PE=2 SV=1;; (*TAIR) AT4G13940.1 (e_value=0.0) | Symbols: HOG1, EMB1395, SAHH1, MEE58, ATSAHH1 | S-adenosyl-L-homocysteine hy…	MALLVEKTTSGREYKVKDMSQADFGRLEIELAEVEMPGLMACRTEFGPSQPFKGAKITGSLHMTIQTAFCRTEFGPSQPFKGAKITGSLHMTIQTAVLIETLTALGAEEYWWCTERALDWGPGGGPDLIVDDGGDATLLIHEGVKAEEEYAKNGTIPDPNSTDNAEFQLVLTIIKESLKTDPLKYTKMKERLVGVSEETTTGVKRLYQMQANGTLLFPAINVNDSVTKSKFDNLYGCRHSLPDGLMRATDVMIAGKVALVAGYGDVGKGCAAALKQAGARVIVTEIDPICALQATMEGLQVLTLEDVVSDVDIFVTTTGNKDIIMVDHMRKMKNNAIVCNIGHFDNEIDMLGLETYPGVKRITIKPQTDRWVFPDTNSGIIVLAEGRLMNLGCATGHPS…	0	2	1	0	2	0	0	0	0
NbS00056603g0002.1 protein AED:0.27 eAED:0.27 QI:0|0.33|0.5|1|1|1|4|0|363; (*GB) gi|340501186|gb|EGR27996.1| (e_value=0.0) hypothetical protein IMG5_185210 [Ichthyophthirius multifiliis];; (*SWP) sp|P30157|TBB6_ECTVR (e_value=0.0) Tubulin beta-6 chain OS=Ectocarpus variabilis GN=TUBB6 PE=2 SV=1;; (*TAIR) AT1G75780.1 (e_value=1e-149) | Symbols: TUB1 | tubulin beta-1 chain | chr1:28451378-28453602 …	MREILHIQGGQCGNQIGSKFWEVICDEHGVDPTGRYKGTAAESDLQLERINVYFNEASGGRYVPRAVLMDLEPGTMDSIRSGPYGQIFRPDNFVFGQSGAGNNWAKGHYTEGAELIDAVLDVVRKEAENCDCLQGFQVCHSLGGGTGSGMGTLLISKIREEYPDRMMLTFSVFPSPKVSDTVVEPYNATLSVHQLVENADECMVLDNEALYDICFRTLKLTTPSLPELTQQMWDAKNMMCAADPRHGRYLTASAMFRGKMSTKEVDEQMINVQNKNSSYFVEWIPNNVKSSEMFRRVSEQFTAMFRRKAFLHWYTGEGMDEMEFTEAESNMNDLVAEYQQYQDATADDEEEYEEEGAEEHYES	0	2	2	1	1	0	1	1	0
NbS00056940g0001.1 protein AED:0.00 eAED:0.00 QI:0|-1|0|1|-1|1|1|0|464; (*GB) gi|75216452|sp|Q9ZS34.1|CHLP_TOBAC (e_value=0.0) RecName: Full=Geranylgeranyl diphosphate reductase, chloroplastic; AltName: Full=Geranylgeranyl reductase; Flags: Precursor;; (*SWP) sp|Q9ZS34|CHLP_TOBAC (e_value=0.0) Geranylgeranyl diphosphate reductase, chloroplastic OS=Nicotiana tabacum GN=CHLP PE=2 SV=1;; (*TAIR) AT1…	MASIALKTFTGLRQSSPESNSITLSKSLPLTQTHRRLRINASKSSPRVNGRNLRVAVVGGGPAGGAAAETLAKGGIETFLIERKMDNCKPCGGAIPLCMVGEFDLPLDIIDRKVTKMKMISPSNVAVDIGQTLKPHEYIGMVRREVLDAYLRDRAAEAGASVLNGLFLKMDMPKVPNAPYVLHYTAYDSKTNGAGEKRTLEVDAVIGADGANSRVAKSINAGDYEYAIAFQERIRISDDKMKYYENLAEMYVGDDVSPDFYGWVFPKCDHVAVGTGTVTHKADIKKFQLATRLRADSKITGGKIIRVEAHPIPEHPRPRRLQDRVALVGDAAGYVTKCSGEGIYFAAKSGRMCAEAIVEGSEMGKRMVDESDLRKYLEKWDKTYWPTYKVLDILQKVFY…	0	2	1	1	1	0	1	3	0
NbS00033331g0008.1 protein AED:0.30 eAED:0.30 QI:475|0.77|0.8|1|0.77|0.7|10|324|419; (*GB) gi|327198779|emb|CBL43264.1| (e_value=0.0) glyceraldehyde-3-phosphate dehydrogenase [Solanum tuberosum];; (*SWP) sp|P12859|G3PB_PEA (e_value=0.0) Glyceraldehyde-3-phosphate dehydrogenase B, chloroplastic OS=Pisum sativum GN=GAPB PE=2 SV=2;; (*TAIR) AT1G42970.1 (e_value=0.0) | Symbols: GAPB | glyceraldehyde-…	MASHAALAPSRIPTSTRLPSKNSYSFPTQCLFKKFEVAEFSGLRSSGCVTFSNKESSFFDVVSAQLTPKGETVAKLKVAINGFGRIGRNFLRCWHGRKDSPLDVIVVNDSGGVKNASHLLKYDSMLGTFKADVKIVDNETISVDGKHIKGTGVFVDGPGAGKHIQAGAKKVIITAPAKGADIPTYVVGVNEQDYSHEVANIVSNASCTTNCLAPFVKVMDEEFGIVKGTMTTTHSYTGDQRLLDASHRDLRRARAAALNIVPTSTGAAKAVSLVLPQLKGKLNGIALRVPTPNVSVVDLVVNVEKKGISAEDVNAAFRKAADGPLNGILAVCDVPLVSVDFRCSDVSSTIDSSLTMVMGDDMVKVVAWYDNEWGYSQRVVDLAHLVASKWPGSSVEGSG…	0	4	3	0	4	0	3	0	0
NbS00011813g0009.1 protein AED:0.21 eAED:0.24 QI:185|0.63|0.83|1|0.90|0.83|12|369|310; (*GB) gi|157042763|gb|ABV02033.1| (e_value=5e-167) glyceraldehyde 3-phosphate dehydrogenase [Nicotiana langsdorffii x Nicotiana sanderae];; (*SWP) sp|P25858|G3PC_ARATH (e_value=1e-156) Glyceraldehyde-3-phosphate dehydrogenase, cytosolic OS=Arabidopsis thaliana GN=GAPC PE=1 SV=2;; (*TAIR) AT1G13440.2 (e_value=1e…	MASDKKIKIGINGFGRIGRLVARVALQRDDVELVAVNDPFISTDYMTYMFKYDSVHGQWKHHELKVKDEKTLLFGEKSVRVFGIRNPEEIPWAEAGADFVVESTGVFTDKDKAAAHLKILFLALDLVLRRKTKQIPASTQKTVDGPSMKDWRGGRAASFNIIPSSTGAAKAVGKVLPALNGKLTGMAFRVPTVDVSVVDLTVRLEKEASYDEIKAAINYTNLFHGLGIHREESEGKLREESEGKLKGILGFTEDDVVSTDFVGDSRSSIFDAQAGIALSKNFVKLVSWYDNEWGYSSRVIDLICHMASVA	0	3	3	3	3	0	5	2	0
NbS00029815g0004.1 protein AED:0.17 eAED:0.18 QI:0|0.8|0.5|1|1|1|6|0|306; (*GB) gi|224086078|ref|XP_002307806.1| (e_value=2e-148) predicted protein [Populus trichocarpa];; (*SWP) sp|P12859|G3PB_PEA (e_value=5e-148) Glyceraldehyde-3-phosphate dehydrogenase B, chloroplastic OS=Pisum sativum GN=GAPB PE=2 SV=2;; (*TAIR) AT1G42970.1 (e_value=4e-145) | Symbols: GAPB | glyceraldehyde-3-phosphate dehydro…	GTGVFVDGPGAGKHIQAGAKKVIITAPAKGADIPTYVVGVNEQDYSHEVADIISNASCTTNCLAPFVKVMDEELSIVKGTMTTTHSYTGDQRLLDASHRDLRRARAAALNIVPTSTGAAKAVSLVLPQLKGKLNGIALRVPTPNVSVVDLVVNVAKKGITAEDVALGKLNGIALRVPTPNVSVVDLVVNVAKKGITAEDVNAAFRKAADGPLKGVLAVCDEPLVSVDFRCSDVSSTIDSSLTMVMGDDMVKVVAWYDNEWGYSQRVVDLAHLVANKWPGVAVAGSGDPLDEFCKTNPADEECKVYE	0	3	2	0	2	0	1	1	0
NbS00020600g0007.1 protein AED:0.15 eAED:0.15 QI:196|1|1|1|1|1|4|497|260; (*GB) gi|3023189|sp|P93343.1|1433C_TOBAC (e_value=0.0) RecName: Full=14-3-3-like protein C; AltName: Full=14-3-3-like protein B;; (*SWP) sp|P93343|1433C_TOBAC (e_value=0.0) 14-3-3-like protein C OS=Nicotiana tabacum PE=1 SV=1;; (*TAIR) AT1G78300.1 (e_value=1e-165) | Symbols: GRF2, 14-3-3OMEGA, GF14 OMEGA | general regulator…	MAVAPTAREENVYMAKLAEQAERYEEMVEFMEKVSNSLGSEELTVEERNLLSVAYKNVIGARRASWRIISSIEQKEESRGNEEHVNSIREYRSKIENELSKICDGILKLLDAKLIPSAASGDSKVFYLKMKGDYHRYLAEFKTGAERKEAAESTLTAYKAAQDIATTELAPTHPIRLGLALNFSVFYYEILNSPDRACNLAKQAFDEAIAELDTLGEESYKDSTLIMQLLRDNLTLWTSDMQDDGADEIKEDPKPDEAKN	0	2	1	0	1	0	0	0	0
NbS00060175g0001.1 protein AED:0.12 eAED:0.13 QI:0|0.75|0.6|1|1|1|5|393|262; (*GB) gi|42491254|dbj|BAD10939.1| (e_value=0.0) 14-3-3 protein [Nicotiana tabacum];; (*SWP) sp|P93784|14335_SOLTU (e_value=0.0) 14-3-3-like protein 16R OS=Solanum tuberosum PE=2 SV=1;; (*TAIR) AT1G78300.1 (e_value=3e-165) | Symbols: GRF2, 14-3-3OMEGA, GF14 OMEGA | general regulatory factor 2 | chr1:29461883-29463052 FORW…	MASPREENVYMAKLAEQAERYEEMVEFMEKVIAAADGAEELTVEERNLLSVAYKNVIGARRASWRIISSIEQKEESRAHWCRNEDHVASIKEYRSKIEIELTSICNGILKLLDSKLIGAAATGDSKVFYLKMKGDYHRYLAEFKTGAERKEAAENTLSAYKSAQDIANTELAPTHPIRLGLALNFSVFYYEILNSPDRACNLAKQAFDEAIAELDTLGEESYKDSTLIMQLLRDNLTLWTSDMQDDGTDEIKEAAKPDNEQQ	0	2	1	0	1	0	0	0	0
NbS00006901g0005.1 protein AED:0.09 eAED:0.09 QI:0|1|1|1|1|1|4|498|258; (*GB) gi|42491254|dbj|BAD10939.1| (e_value=0.0) 14-3-3 protein [Nicotiana tabacum];; (*SWP) sp|P93784|14335_SOLTU (e_value=0.0) 14-3-3-like protein 16R OS=Solanum tuberosum PE=2 SV=1;; (*TAIR) AT1G78300.1 (e_value=3e-169) | Symbols: GRF2, 14-3-3OMEGA, GF14 OMEGA | general regulatory factor 2 | chr1:29461883-29463052 FORWARD L…	MASPREENVYMAKLAEQAERYEEMVEFMEKVVAAADGAEELTVEERNLLSVAYKNVIGARRASWRIISSIEQKEESRGNEDHVAYIKEYRSKIETELTSICNGILKLLDSKLIGAAATGDSKVFYLKMKGDYHRYLAEFKTGAERKEAAENTLSAYKSAQDIANTELAPTHPIRLGLALNFSVFYYEILNSPDRACNLAKQAFDEAIAELDTLGEESYKDSTLIMQLLRDNLTLWTSDMQDDGTDEIKEAAKPDNEQQ	0	2	1	0	1	0	0	0	0
NbS00044522g0009.1 protein AED:0.03 eAED:0.03 QI:0|0.66|0.5|1|0.66|0.75|4|0|282; (*GB) gi|3912951|sp|O49998.1|1433F_TOBAC (e_value=3e-179) RecName: Full=14-3-3-like protein F;; (*SWP) sp|O49998|1433F_TOBAC (e_value=0.0) 14-3-3-like protein F OS=Nicotiana tabacum PE=2 SV=1;; (*TAIR) AT1G78300.1 (e_value=2e-158) | Symbols: GRF2, 14-3-3OMEGA, GF14 OMEGA | general regulatory factor 2 | chr1:29461883-…	MASSRDEFVYMAKLAEQAERYEEMVEFMEKVVTAADSGEELTIEERNLLSVAYKNVIGARRASWRIISSIEQKEESRGNEYHVISIKTYRSKIESELTSICNGILKLLDSNLIGAASTGDSKVFYLKMKGDYHRYLAEFKTGAERKEAAENTLSAYKSAQDIANAELAPTHPVRLGLALNFSVFYYEILNSPDRACNLAKQAFDEAIAELDTLGEESYKDSTLIMQLLRDNLTLWTSDMQASSFYSLVNEIVSLILVMIVLLSHDEGTEEMKEVAKPDNEEH	0	2	1	0	1	0	0	0	0
NbS00017313g0001.1 protein AED:0.12 eAED:0.12 QI:0|0|0|0.5|1|1|2|0|173; (*GB) gi|116778782|gb|ABK20993.1| (e_value=4e-90) unknown [Picea sitchensis];; (*SWP) sp|P46293|RS16_GOSHI (e_value=6e-89) 40S ribosomal protein S16 OS=Gossypium hirsutum GN=RPS16 PE=2 SV=1;; (*TAIR) AT2G09990.1 (e_value=2e-89) | Symbols: | Ribosomal protein S5 domain 2-like superfamily protein | chr2:3781442-3781882 FORWARD …	MQKLEASAESVQCFGRKKTAVAVTHCKRGRGLIKINGVPIELVQPEILRYKAFEPILLLGRHRFAGVDMRIRVKGGGHTSQIYAIRQSIAKALVAFYQKYVDEQSKKEIKDILVRYDRTLLVADPRRCEPKKFGGRGARARYDRTLLVADPRRCEPKKFGGRGARARFQKSYR	0	2	1	0	0	0	2	0	0
NbS00017314g0001.1 protein AED:0.01 eAED:0.01 QI:0|-1|0|1|-1|1|1|0|147; (*GB) gi|116778782|gb|ABK20993.1| (e_value=7e-95) unknown [Picea sitchensis];; (*SWP) sp|P46293|RS16_GOSHI (e_value=2e-93) 40S ribosomal protein S16 OS=Gossypium hirsutum GN=RPS16 PE=2 SV=1;; (*TAIR) AT2G09990.1 (e_value=6e-93) | Symbols: | Ribosomal protein S5 domain 2-like superfamily protein | chr2:3781442-3781882 FORWARD …	MQKLEATAESVQCFGRKKTAVAVTHCKRGRGLIKINGVPIELVQPEILRYKAFEPILLLGRHRFAGVDMRIRVKGGGHTSQIYAIRQSIAKALVAFYQKYVDEQSKKEIKDILVRYDRTLLVADPRRCEPKKFGGRGARARFQKSYR	0	2	1	0	0	0	2	0	0
NbS00023446g0003.1 protein AED:0.25 eAED:0.25 QI:0|-1|0|1|-1|1|1|0|147; (*GB) gi|116778782|gb|ABK20993.1| (e_value=3e-95) unknown [Picea sitchensis];; (*SWP) sp|P46293|RS16_GOSHI (e_value=1e-93) 40S ribosomal protein S16 OS=Gossypium hirsutum GN=RPS16 PE=2 SV=1;; (*TAIR) AT2G09990.1 (e_value=8e-93) | Symbols: | Ribosomal protein S5 domain 2-like superfamily protein | chr2:3781442-3781882 FORWARD …	MNAAPAAVESVQCFGRKKTAVAVTHCKRGRGLIKINGVPIELVQPEILRYKAFEPILLLGRHRFAGVDMRIRVKGGGHTSQIYAIRQSIAKALVAFYQKYVDEQQKKEIKDILVRYDRTLLVADPRRCEPKKFGGRGARARFQKSYR	0	2	1	0	0	0	2	0	0
NbS00024272g0001.1 protein AED:0.00 eAED:0.00 QI:0|1|0.5|1|0|0|2|876|185; (*GB) gi|225428853|ref|XP_002285101.1| (e_value=1e-89) PREDICTED: 40S ribosomal protein S16 [Vitis vinifera];; (*SWP) sp|P46293|RS16_GOSHI (e_value=3e-86) 40S ribosomal protein S16 OS=Gossypium hirsutum GN=RPS16 PE=2 SV=1;; (*TAIR) AT2G09990.1 (e_value=6e-86) | Symbols: | Ribosomal protein S5 domain 2-like superfamily prote…	MAAAVAVASPMESVQCFGRKKTAVAVTHCKRGRGLIKINGVPIELVQPEILRYKAFEPILLLGRHRFAGVDMRIRVNGGGHTSQIYAIRQSIAKALVARHRFAGVDMRIRVKGGGHTSQIYAIRQSIAKALVAFYQKYVDEQSKKEIKDILVRYDRTLLVADPRRCEPKKFGGRGARARFQKSYR	0	2	1	2	0	0	2	2	0
NbS00025703g0002.1 protein AED:0.01 eAED:0.01 QI:0|-1|0|1|-1|1|1|0|147; (*GB) gi|116778782|gb|ABK20993.1| (e_value=3e-95) unknown [Picea sitchensis];; (*SWP) sp|P46293|RS16_GOSHI (e_value=1e-93) 40S ribosomal protein S16 OS=Gossypium hirsutum GN=RPS16 PE=2 SV=1;; (*TAIR) AT2G09990.1 (e_value=8e-93) | Symbols: | Ribosomal protein S5 domain 2-like superfamily protein | chr2:3781442-3781882 FORWARD …	MNAAPAAVESVQCFGRKKTAVAVTHCKRGRGLIKINGVPIELVQPEILRYKAFEPILLLGRHRFAGVDMRIRVKGGGHTSQIYAIRQSIAKALVAFYQKYVDEQQKKEIKDILVRYDRTLLVADPRRCEPKKFGGRGARARFQKSYR	0	2	1	0	0	0	2	0	0
NbS00031189g0001.1 protein AED:0.00 eAED:0.00 QI:0|-1|0|1|-1|1|1|0|150; (*SWP) sp|P46293|RS16_GOSHI (e_value=1e-93) 40S ribosomal protein S16 OS=Gossypium hirsutum GN=RPS16 PE=2 SV=1;; (*TAIR) AT2G09990.1 (e_value=4e-93) | Symbols: | Ribosomal protein S5 domain 2-like superfamily protein | chr2:3781442-3781882 FORWARD LENGTH=146;; (*ITAG) Solyc04g026100.1.1 (e_value=3e-100) evidence_code:10F1H1E1…	MAAAVAVASPMESVQCFGRKKTAVAVTHCKRGRGLIKINGVPIELVQPEILRYKAFEPILLLGRHRFAGVDMRIRVKGGGHTSQIYAIRQSIAKALVAFYQKYVDEQSKKEIKDILVRYDRTLLVADPRRCEPKKFGGRGARARFQKSYR	0	2	1	2	0	0	2	2	0
NbS00025844g0001.1 protein AED:0.00 eAED:0.00 QI:0|-1|0|1|-1|1|1|0|309; (*GB) gi|46399269|gb|AAS92255.1| (e_value=0.0) putative pyridoxine biosynthesis protein isoform A [Nicotiana tabacum];; (*SWP) sp|Q39963|PDX1_HEVBR (e_value=0.0) Probable pyridoxal biosynthesis protein PDX1 OS=Hevea brasiliensis GN=PDX1 PE=2 SV=1;; (*TAIR) AT5G01410.1 (e_value=0.0) | Symbols: PDX1, ATPDX1.3, RSR4, PDX1.3, ATP…	MAGSGVVTLYGNGALTETTKQSPFSVKVGLAQMLRGGVIMDVVNAEQARIAEEAGACAVMALERVPADIRAQGGVARMSDPQLIKEIKQAVTIPVMAKARIGHFVEAQILEAIGIDYVDESEVLTLADDENHINKHNFRIPFVCGCRNLGEALRRIREGAAMIRTKGEAGTGNIIEAVRHVRSVMGDIRVLRNMDDDEVFTFAKKLQAPYDLVMQTKQLGRLPVVHFAAGGVATPADAALMMQLGCDGVFVGSGIFKSGDPAKRGRAIVQAVTHYSDPGLLAEISCGLGEAMVGINLDDKVERYANRSE	0	0	9	3	0	0	0	0	0
NbS00011959g0015.1 protein AED:0.37 eAED:0.37 QI:94|0.66|0.25|1|1|1|4|0|201; (*SWP) sp|Q9M612|NACA_PINTA (e_value=2e-67) Nascent polypeptide-associated complex subunit alpha-like protein OS=Pinus taeda PE=2 SV=1;; (*TAIR) AT3G12390.1 (e_value=6e-60) | Symbols: | Nascent polypeptide-associated complex (NAC), alpha subunit family protein | chr3:3942344-3943595 FORWARD LENGTH=203;; (*ITAG) Solyc10g0…	MTAQSPEEILAAHLEQQKMESEEPIIEDEADDDDDEDDDDDKDEDDAEEDGDASGRSKQSRSEKKSRKAMIKLGMKPIPGVSRVTVKKSKNILFVISKPDVFKSPASDTYVIFGEAKIEDLSSQLSSQAAEQFKAPNLSNVISKPEPSTVAQDDEDVDETGVEPKDIELVMTQAGVSRAKAVKALKGADGDIVSAIMELTN	0	0	7	2	0	0	0	0	0
NbS00017011g0015.1 protein AED:0.17 eAED:0.17 QI:0|0.66|0.42|0.85|0.66|0.71|7|0|710; (*GB) gi|225434141|ref|XP_002274969.1| (e_value=0.0) PREDICTED: uncharacterized protein LOC100250760 [Vitis vinifera];; (*SWP) sp|Q7Z9H9|FIG4_SCHPO (e_value=3e-19) Polyphosphoinositide phosphatase OS=Schizosaccharomyces pombe (strain 972 / ATCC 24843) GN=SPAC1093.03 PE=2 SV=3;; (*TAIR) AT3G59770.1 (e_value=0.0) |…	SRSFGSLGQQEGVVALTARRSRLHPGTRYLARGLNSCYSTGNEVECEQLVWIPKRAGQSVPFNTYIWRRGTIPIWWGAELKLTAAEAEIYVASGDPYKGSAQYYQRLTKRYDARNLDVAASGNQRKIAFVPIICVNLLRNGEGKSESILVQHFEESLNYIRSIGKLPYSRVHLINYDWHASVKLKGEQQTIEGLWYLLKAPTNAIGITEGDYLPSRQRLKDCKGEVIYSDDIDGAFCLRSHQNGVIRFNCADSLDRTNAASFFGALQVFVEQCRRLGISLDSDLAYGYQSYNNNGGYTAPLPPGWEKRTDAVTGKTYFIDHNTRTTTWNHPCPDKPWKRFDMTFEEFKRSTILSPVSQLADLFLVAGDTHATLYTGSKAMHSQILSIFNEDAGKFKQFS…	0	0	7	4	0	0	0	1	0
NbS00005985g0007.1 protein AED:0.25 eAED:0.27 QI:0|0.71|0.62|1|0.71|0.75|8|0|1213; (*GB) gi|374095601|gb|AEY85028.1| (e_value=0.0) putative ATP-binding protein [Camellia sinensis];; (*SWP) sp|Q54BC9|DYRK2_DICDI (e_value=2e-59) Probable serine/threonine-protein kinase dyrk2 OS=Dictyostelium discoideum GN=dyrk2 PE=3 SV=1;; (*TAIR) AT1G73460.1 (e_value=0.0) | Symbols: | Protein kinase superfamily pr…	MGDSNSVDVILEFLRKNKFTRAEAALRGELNNRPDLNGVLQKLTIEDKELSQSSEGANRGKATTETPGTTFRSSEDVYKETSSRSSGEISKELIVKEIECGTGGNGSDCNWKNVQEQKKVTESVGTSDKNFSFANSSEDTIDLYSWKYTPLNGLVTSYQNEGGTTGTIDLSGLVRSGKSKLNSSEVFDTSKTHAKYEEDVSFSEKRTSWPGSTSKDTVEPKHDNSRTIELKEVDHQIKLSGACSKDVMINNPWSKSDEFTHPSSEPWKDCTVKTVFPFPKGDVSTSYEHDISSIDKKEGKRKTEVNDVRAAVKEQVDEVGRALFLGKTQGSEPKEFSSLGFSSVSESQKEGFPRLAPVRLKSEEKSFSIPWEEKFERGGPASRISNADDTYFIGSFLDV…	0	0	6	8	0	0	0	0	0
NbS00029438g0007.1 protein AED:0.33 eAED:0.33 QI:81|1|1|1|1|1|9|359|350; (*GB) gi|13310811|gb|AAK18619.1|AF352797_1 (e_value=0.0) ankyrin-repeat protein HBP1 [Nicotiana tabacum];; (*SWP) sp|Q9SAR5|AKR2_ARATH (e_value=2e-142) Ankyrin repeat domain-containing protein 2 OS=Arabidopsis thaliana GN=AKR2 PE=1 SV=2;; (*TAIR) AT2G17390.1 (e_value=5e-144) | Symbols: AKR2B | ankyrin repeat-containing 2B | …	MSEGEKVLPTASADEKSGASENKISSESSSTEAPSGEARTTSTAAAGAGLQNPFDFSAMSGLLNDPSIKELAEQIAKDPAFNQMAEQLQKTFQGAAVEESVPNFDSQQYYSTMQQVMQNPQFMTMAERLGNALMQDPSMSGMLESLSNPAQKEQIEERMARIKEDPSLKPILEEIESGGPAAMMRYWNDQETLKKIGEAMGFAAGGEGATSSAIPGTDETEEANEDESVVHQCASVGDAEGLKAALTAGADKDEEDSEGRTALHFACGYGEVKCAQILLEAGAKVDALDKNKNTALHYAAGYGRKECVALLLENGAAVTLQNLDGKTPIDVAKLNNQQEVLKLLEKDVFL	0	0	6	3	0	0	0	0	0
NbS00047154g0003.1 protein AED:0.31 eAED:0.32 QI:0|0.77|0.7|1|0.88|0.8|10|0|508; (*GB) gi|224117802|ref|XP_002331635.1| (e_value=0.0) methylenetetrahydrofolate reductase [Populus trichocarpa];; (*SWP) sp|Q75HE6|MTHR_ORYSJ (e_value=0.0) Probable methylenetetrahydrofolate reductase OS=Oryza sativa subsp. japonica GN=Os03g0815200 PE=2 SV=1;; (*TAIR) AT3G59970.3 (e_value=0.0) | Symbols: MTHFR1 | meth…	MGLIICGSTADLTLEIANRMQNMVCVETMMHLTCTNMPVEKIDHALETIKSNGIQNVLALRGDPPHGQDKFVQVEEAHPDVIPANGIATQETYENDLAYLKKKVDAGADLIVTQLFYDTDIFLKFVNDCRQIGITCPIVPGIMPINNYKGFLRMTGFCKTKIPAEITAALEPIKDNEEAVKAYGIHQATEMCKKILATGIKTLHLYTLNMEKSALAILMNLGLIEESKISRPLPWRRPTNVFRVKEDVRPIFWANRPKSYISRTIDWDEYPHGRWGNAQNPSYGALSDYQFMRARSRDKKLQEEWAFALNSVEDIYERFMNYCLGKLRSCPWSELDGLQPETKIIDEHLSNINTKGFLTINSQPAVNGAKSDAPSIGWGGPGGYVYQKAYLEFFCSHEK…	0	0	5	2	0	0	0	0	0
NbS00014198g0009.1 protein AED:0.34 eAED:0.34 QI:244|0.83|0.73|1|0.88|0.78|19|0|804; (*GB) gi|225463508|ref|XP_002263911.1| (e_value=0.0) PREDICTED: uridine kinase-like protein 4 [Vitis vinifera];; (*SWP) sp|Q8VYB2|UKL3_ARATH (e_value=0.0) Uridine kinase-like protein 3 OS=Arabidopsis thaliana GN=UKL3 PE=1 SV=1;; (*TAIR) AT1G55810.3 (e_value=0.0) | Symbols: UKL3 | uridine kinase-like 3 | chr1:2086…	MGSNAVEDLIEASSGVHYSGFHMEQPRTTEIEQPTTSIDDSFHKQPFIIGVAGGAASGKTTVCDLIMEQLHDQRVVLVNQDSFYHTLTLEELTKVHEYNFDHPDAFDTEQLLRVVEKLKHGQAVDIPKYDFKSYKNDVFPLRRVNPSDVIILEGILIFHDPRVRYLMNMKIFVDTDADVRLARRIRRDTAEKGRDIATVLDQYSKFVKPAFDDFILPTKKYADIIIPRGGDNHVAIDLIVQHLRTKLGQHDLCKIYPNLYVIQSTFQIRGMHTLIRDAQTTKHDIVFYADRLIRLVVEHGLGHLPFTEKQVITPTGSVYSGVDFCKRLCGVSVIRSGESMENALRACCKGIKIGKILIHREGDNGQQLIYEKLPLDIAERHVLLLDPILGTGNSAVQAI…	0	0	5	5	0	0	0	0	0
NbS00010495g0008.1 protein AED:0.05 eAED:0.05 QI:0|0.86|0.93|0.93|0.73|0.81|16|352|560; (*GB) gi|302141720|emb|CBI18923.3| (e_value=0.0) unnamed protein product [Vitis vinifera];; (*SWP) sp|Q9SZN1|VATB2_ARATH (e_value=0.0) V-type proton ATPase subunit B2 OS=Arabidopsis thaliana GN=VHA-B2 PE=2 SV=1;; (*TAIR) AT4G38510.5 (e_value=0.0) | Symbols: | ATPase, V1 complex, subunit B protein | chr4:180111…	NNLRFSHFVLFFPVTTQSPLSSLSRPGGITFDSLFLFSLYGPTYFSLSALSFGFQKKRLSMGEAQNNIDMDEGTLEVGMEYRTVSGVAGPLVILDKVKGPKYQEIVNIRLGDGTTRRGQVLEVDGEKAVVQVFEGTSGIDNKYTTVQFTGEVLKTPVSLDMLGRIFNGSGKPIDNGPPILPEAYRDISGSSINPSERTYPEEMIQTGISTIDVMNSIARGQKIPLFSAAGLPHNEIAAQICRQAGLVKRLEKSENLLEKSEDDNFAIVFAAMGVNMETAQFFKRDFEENGSMERVTLFLNLANDPTIERIITPRIALTTAEYLAYECGKHVLVILTDMSSYADALREVSAAREEVPGRRGYPGYMYTDLATIYERAGRIEGRTGSITQIPILTMPNDDI…	0	0	5	2	0	0	1	0	0
NbS00019485g0004.1 protein AED:0.22 eAED:0.22 QI:185|0.88|0.9|1|1|1|10|402|373; (*GB) gi|315307974|gb|ADU04390.1| (e_value=0.0) SGT1 [Nicotiana attenuata];; (*SWP) sp|Q0JL44|SGT1_ORYSJ (e_value=2e-151) Protein SGT1 homolog OS=Oryza sativa subsp. japonica GN=SGT1 PE=1 SV=1;; (*TAIR) AT4G11260.1 (e_value=6e-145) | Symbols: ATSGT1B, ETA3, RPR1, EDM1, SGT1B | phosphatase-related | chr4:6851515-685371…	MASDLEIRAKEAFIDDHFELAVDLYTQAIAMTPKNAELFADRAQANIKLNYFTEAVVDANKAIELDPSMSKAYLRKGLACIKLEEYQTAKAALETGASLAPAESRFTKLIKECDERIAEEAGELPNQSVDKTSGNVVAPPASESLNNVAVDTKDAQPTVNLSYQGSAARPKYRHEFYQKPEEVVVTIFAKGIPAKNVVVDFGEQILSVSIDVPGDETYSFQPRLFGKITPAKCRHEVMSTKIEIRLAKAEPLHWTSLEYTREPAVVQRPNVSSGVFFTIGQLTMTDELTKFVGYTCSEAKLTVEKDEKLDGDAALNKFFRDIYKDADEDTRRAMMKSFVESNGTVLSTNWKEVGAKKVEGSPPDGMELKKWEI	0	0	3	2	0	0	0	0	0
NbS00013216g0005.1 protein AED:0.33 eAED:0.37 QI:48|1|0.71|1|0.83|1|7|212|247; (*GB) gi|292630750|sp|D1I234.1|DRE2_VITVI (e_value=1e-87) RecName: Full=Anamorsin homolog; AltName: Full=Fe-S cluster assembly protein DRE2 homolog;; (*SWP) sp|D1I234|DRE2_VITVI (e_value=4e-89) Anamorsin homolog OS=Vitis vinifera GN=VIT_01s0010g01180 PE=3 SV=1;; (*TAIR) AT5G18400.3 (e_value=7e-66) | Symbols: | Cytokine…	MVPVSVVSSAISIVRKEGIEKLDPNIITQTSSQSMTSVKSASMDIIALICRSLEFPSDKLCGDISRVLKPGGTVLLSLSSQLISKANSTHERKLLLAGFSDTQSSEAGQSFVITAKKPSWKVGSSFSIKKVAKSLPKVQIDDDSDLIDEDSLLSEEDLKKPQLPSVGDCEVGKSRKACKNCTCGRAEAETKVQLGPTAEQLNNPQSACGSCGLGDAFRCSTCPYKGLPPFKLGEKVTLSGNFLDADI	0	0	3	2	0	0	0	0	0
NbS00039092g0002.1 protein AED:0.19 eAED:0.19 QI:543|1|1|1|1|1|6|319|375; (*GB) gi|350539619|ref|NP_001234734.1| (e_value=0.0) GDP-mannose 3',5'-epimerase [Solanum lycopersicum];; (*SWP) sp|A2Z7B3|GME1_ORYSI (e_value=0.0) GDP-mannose 3,5-epimerase 1 OS=Oryza sativa subsp. indica GN=OsI_032456 PE=2 SV=1;; (*TAIR) AT5G28840.2 (e_value=0.0) | Symbols: GME | GDP-D-mannose 3',5'-epimerase | chr5:10862…	MGSSGMDYGAYTYENLEREPYWPTEKLRISITGAGGFIASHIARRLKSEGHYIIASDWKKNEHMTEDMFCHEFHLVDLRVMDNCLKVTKDVDHVFNLAADMGGMGFIQSNHSVIFYNNTMISFNMMEAARINGVKRFFYASSACIYPEFKQLETNVSLKESDAWPAEPQDAYGLEKLATEELCKHYNKDFGIECRIGRFHNIYGPFGTWKGGREKAPAAFCRKAQTAVDKFEMWGDGLQTRSFTFIDECVEGVLRLTKSDFREPVNIGSDEMVSMNEMAEMVLSFEDKKLPIHHIPGPEGVRGRNSDNTLIKEKLGWAPTMRLKDGLRITYFWIKEQIEKEKSQGVNIANYGSSKVVGTQAPVELGSLRAADGKE	0	0	3	2	0	0	0	0	0
NbS00024708g0007.1 protein AED:0.25 eAED:0.26 QI:0|0.90|0.95|1|0.85|0.86|22|366|726; (*GB) gi|225461512|ref|XP_002285125.1| (e_value=0.0) PREDICTED: uncharacterized protein LOC100258981 isoform 1 [Vitis vinifera];; (*SWP) sp|O61122|SVKA_DICDI (e_value=5e-120) Serine/threonine-protein kinase svkA OS=Dictyostelium discoideum GN=svkA PE=1 SV=1;; (*TAIR) AT3G15220.1 (e_value=0.0) | Symbols: | Protein…	MPKHKTETRSRFSDLELIGRGSFGDVYKGFDKELNKEVAIKVIDLEESEDEVEDIQKEIAVLSQCRSPYITEYYGSYLHQTKLWIIMEYMAGGSVADLIQPNQPLDEMSIACILRDLLHAVEYLHSEGKIHRDIKAANILLSENGDVKVADFGVSAQLTRTISRRKTFVGTPFWMAPEVIQNSEGYNEKADIWSLGITAIEMVKGEPPLADLHPMRVLFIIPRENPPQLEEHFSRPLKEFVSLCLKKSPTELEEHFSRPLKEFVSLCLKKSPTERPSAKELLKHRFIRNARKSPKLLERIRERPKFEIKDDIDSPRNGLKPVGEASGTVKVTRDTGTEDTVKVGGQGKTLKTAGWDFSIGGSSSTGTVRSVKPPQVRDRKPEVPSNQPASNKNLDSGNN…	0	0	3	3	0	0	0	1	0
NbS00007871g0114.1 protein AED:0.14 eAED:0.14 QI:0|1|0.75|1|1|1|4|0|904	MAASVENRQFSHLEAGLSRSFKPRSDSPVRGCNFPSSHSTNFQKKPNSTIYLDYSSSEDDDDDDEKNEYLQMIKKGNSELEPSVHDTRDEGTADNWIERNFSMIRLTGKHPFNSEPPLNRLMHHGFITPVPLHYVRNHGPVPKGTWDDWTVEVTGLVKRPMKFTMDQLVNEFPSRELPVTLVCAGNRRKEQNMVKQTIGFNWGAAAVSTTIWRGVPLRALLRRCGVFSKNKGALNVCFEGADTLPGGGGSKYGTSIKKEFAMDPARDIIVAYMQNGEKLTPDHGFPVRMIIPGFIGGRMVKWIKRIIVTTQESDSYYHFKDNRVLPPHVDAELANTEAWWYKPEYIINELNINSVITTPCHEEILPINAWTTQRPYTLRGYSYSGGGKKVTRVEVTLDG…	0	0	3	4	0	0	0	0	0
NbS00001150g0019.1 protein AED:0.21 eAED:0.21 QI:168|1|1|1|1|1|2|108|452; (*GB) gi|7415599|dbj|BAA93453.1| (e_value=0.0) acyltransferase homolog [Petunia x hybrida];; (*SWP) sp|Q9FF86|DCR_ARATH (e_value=0.0) BAHD acyltransferase DCR OS=Arabidopsis thaliana GN=DCR PE=2 SV=1;; (*TAIR) AT5G23940.1 (e_value=0.0) | Symbols: EMB3009, PEL3, DCR | HXXXD-type acyl-transferase family protein | chr5:8076616…	MAGEVAKEETVVTKVKILKKTNVKPHKPLGKKECQLVTFDLPYLAFYYNQKLLIYKGAENFDETVEKLKDGLTLVLEDFYQLAGKLGKDDEGVFKVEYDDDMDGAEVIVAAAEGIEVADLTDEEGTSKFLDLIPCNKILNFEGLHRPLLAVQLTKLKDGLTIGIAFNHAVLDGTSTWHFMASWAQLCSGSTSISVPPFLERTKARNTRVKLNLSPPSDATEPDKSAPNGDVIASVDPPLRERIFKFSESAIDQIKSKVNANPPEGSSNPFSTFQSLSAHVWLAITRARQLKPEDYTVYTVFADCRKRVDPPMPESYFGNLIQAIFTVTAAGLLLSQPIEFAAGMIQQAIVKHDAKAIDERNKEWESNPKIFQYKDAGVNCVAVGSSPRFKVYDVDFGWG…	0	0	3	3	0	0	0	0	0
NbS00030823g0007.1 protein AED:0.22 eAED:0.22 QI:0|0.83|0.76|0.96|0.83|0.84|25|186|1465; (*GB) gi|225437885|ref|XP_002265367.1| (e_value=0.0) PREDICTED: CLIP-associating protein-like [Vitis vinifera];; (*SWP) sp|A1A5G0|CLAP1_XENTR (e_value=2e-28) CLIP-associating protein 1 OS=Xenopus tropicalis GN=clasp1 PE=1 SV=1;; (*TAIR) AT2G20190.1 (e_value=0.0) | Symbols: ATCLASP, CLASP | CLIP-associated pro…	MEEALELARAKDTKERMAGVERLHQLLEASRKSLSSSEVTSLVDVCLDLLKDNNFKGALQSLDSAAVLSGEHLKLHFNALVPAVVERLGDSKQPVRDAARRLLLTLMQVSSPTIIVERAGSYAWMHKSFRVREEFARTVTSAIGLFSATELPLQRAILPPILQMLSDPNPGVRDAAISCIEVSKTVVSSQFHVIASILSSVSDFADGLFRRIFVNWSDTQISSSMIMIYVFNNRPSLHVLSSLQEMYSQAGPQFRDELQRHRLPTMMLKDINARLEKIEPKNRLADGIPRNYSAAEVRPTSLNSKKSSPKAKSSTREVSLFGGDGDIAEKPVDPIKVYSEKELVREFEKIASTLVPEKDWSVRIAAMQRIEALVIGGAIDFPCFRGLLKQLVVPLSTQL…	0	0	3	3	0	0	0	0	0
NbS00005908g0002.1 protein AED:0.03 eAED:0.03 QI:228|1|0.5|1|0|0|2|0|749; (*SWP) sp|Q9XE58|SCL14_ARATH (e_value=0.0) Scarecrow-like protein 14 OS=Arabidopsis thaliana GN=SCL14 PE=2 SV=2;; (*TAIR) AT1G07530.1 (e_value=0.0) | Symbols: SCL14, ATGRAS2, GRAS2 | SCARECROW-like 14 | chr1:2313828-2316137 REVERSE LENGTH=769;; (*ITAG) Solyc06g076280.1.1 (e_value=0.0) evidence_code:10F1H1E1IEG genomic_refer…	MDPRFNPLPHSVNTYEFEDQINLSSFEESLNHPLSYTDNYVAFGAPYNTSSPDVGNFAPSSNVSSEVDSPDDHDSDSLFKYLNQILMEENIEDKPCMFHDPLALKAAEKSLYELLGKSYPPSPYHTSDYVDHQLKSPDSILWNSSEHSTSSSNTGTNSTNPQWVVDPGESRLPVESHPSEYNIQPLVQSNSERFRGSLNNFNNSNAHVDSLVNPNVISNVFTDSESILQFKRGMEEASKFLPNLSQFVIDLDKYTFPPKMEEVSKEAVVKVEKDEKNHSPNGTKGRKHQYPEDSDHEDERSNKQSAIYAEEEVELSEMFDRVLLCTDKGTGCSDVKREMPSEVNKSSDQNGQAHGSNGGKTRAKKQGTKNEAVDIRTLLISCAQSVAADDRRTAYEQLK…	0	0	3	2	0	0	0	0	0
NbS00025135g0101.1 protein AED:0.09 eAED:0.09 QI:0|0.5|0.4|1|1|1|5|34|811	MAQILLHGTLHVTIYEVDNLQKEGGGHFFSKIKEHVEETIGLGKGTPEIYATVDLEKARVGRTRKIKNEPKNPRWYESFHIYCAHMASNVIFTVKDDNPIGATLIGRAYVPVEELLEGEEIDKWVEILDREMNPIEEEGSKIHVKLQFFDVSRDPNWARGIRSSKYPGVPYTFFAQRTGCRVSLYQDAHVPDNFIPKIPLSGGKYYEPHRCWEDIFDAITNAKHLIYITGWSVYTEITLVRDSRRQKPGGDITLGELLKKKASEGVKVLMLVWDDRTSVGLLKKDGLMATHDQETEQFFQGTEVNCVLCPRNPDDGGSIVQSLQIGTMFTHHQKIVVVDSELPSGESEKRRILSFVGGIDLCDGRYDTPFHSLFRTLDTAHHDDFHQPNFPDGAITKGG…	0	0	2	3	0	0	0	0	1
NbS00053137g0001.1 protein AED:0.27 eAED:0.27 QI:0|0.5|0.33|1|1|1|3|0|455; (*GB) gi|76573333|gb|ABA46771.1| (e_value=8e-180) unknown [Solanum tuberosum];; (*SWP) sp|Q9M354|AGD6_ARATH (e_value=1e-143) Probable ADP-ribosylation factor GTPase-activating protein AGD6 OS=Arabidopsis thaliana GN=AGD6 PE=1 SV=1;; (*TAIR) AT3G53710.2 (e_value=9e-145) | Symbols: AGD6 | ARF-GAP domain 6 | chr3:19903730-199…	MAASRRLRDLQAQPGNKICVDCSQKNPQWASVSYGVFMCLECSGKHRGLGVHISFVRSVTMDSWSEIQLKKMELGGNDNLNKFMAQYGILKETNIVTKYNTNAASVYRDRIQSLAEGKTWRDPPVVKEGSNSSSKPKPPLSGSRNGNYGGNSNSGWDNWDSFDDGGINGGNNSSNMRRNQTVSDFRSGGGSGGGPARSRSTNDFTHDQYEASAANKDNFFARKMAENESRPDGVPPSQGGKYVGFGSSPGPMPMNNYNNNNSQGDVLSAVTQGFGRLSMIAASAAQELGSKVKEGGYDNKVNETVNVVATKTTEIGQKGWSIMKGVLALASQKVEEYAEGGPNGKDNSWQRSENGQNGYYKEFCKESKGWNSSGGAQSSGRHSNSVSSGSWDDWDSKDN…	0	0	3	3	0	0	0	0	0
NbS00018854g0005.1 protein AED:0.25 eAED:0.25 QI:359|0.9|0.72|1|0.9|0.81|11|406|964; (*GB) gi|255553993|ref|XP_002518037.1| (e_value=0.0) Phosphoenolpyruvate carboxylase, putative [Ricinus communis];; (*SWP) sp|Q02909|CAPP1_SOYBN (e_value=0.0) Phosphoenolpyruvate carboxylase, housekeeping isozyme OS=Glycine max GN=PPC16 PE=2 SV=1;; (*TAIR) AT1G53310.3 (e_value=0.0) | Symbols: ATPPC1, PEPC1, ATPEP…	MSRKIEKMASIDAQLRLLAPAKDLHGEDIRETVQECYELSAEYEGKHDPQKLEELGRMLTSLDAGDSIVVTKAFSNMLNLANLAEEVQIAYRRRSKLKKRDFSDEASALTESDIEETLRKLVGQLNKSPQEVFDALKNQTVDLVLTAHPTQSVRRSLLQKHARVRDCLTQLYAKDITPDDKQELDEALQREIQAAFRTDEIRRTPPTPQDEMRAGMSYFHETIWKGVPKFLHRVDTALKNIGINERVPYNAPLIQFSSWMGGDRDGNPRVTPEVTRDVCLLARMMAAKLYFSQIEDLMFELSMWRCNDELRARADELHRTSKRDTKHYIEFWKQIPPNEPYRVLLADVRDKLYNTRERARQLLASGYSDVSEESTFTNVEQFLEPLELCYRSLCACGDR…	0	0	3	2	0	0	0	0	0
NbS00056823g0003.1 protein AED:0.28 eAED:0.28 QI:123|1|0.75|1|1|1|4|0|202; (*GB) gi|170773910|gb|ACB32231.1| (e_value=3e-102) nascent polypeptide associated complex alpha [Solanum chacoense];; (*SWP) sp|Q9M612|NACA_PINTA (e_value=3e-78) Nascent polypeptide-associated complex subunit alpha-like protein OS=Pinus taeda PE=2 SV=1;; (*TAIR) AT3G12390.1 (e_value=2e-70) | Symbols: | Nascent polypeptide-…	MTAAQSQEELLAAHLEQQKIESEEPIIEDEEDDEDEDDDDDKDDDDDAEDLGDGSGRSKQSRSEKKSRKAMLKLGMKPIPGVSRVTVKKSKNILFVISKPDVFKSPNSDTYVIFGEAKIEDLSSQLQTQAAEQFKAPNLSNVISKPEPSTVAQDDEDVDETGVEPKDIELVMTQAGVSRVKAVKALKAADGDIVSAIMELTN	0	0	2	2	0	0	0	0	0
NbS00010802g0107.1 protein AED:0.25 eAED:0.25 QI:0|0|0|1|0|0|2|0|726	MLSVLTDKGTGVVTSVPSDSPDDYMALHDLKSKPAFRAKFGLKDEWVLPFEIVPIINHPDFGDKSAERICIEKKIKSQNERDKLDEAKKTIYKGGFYEGTVIVGEFAGMRVQEAKSLIRSKLLEMNQAVVFSEPEKKVMSRSGDECVVALTDQWYLTYGESEWRKAAEDCLASMNLLISELEWRKAAEDCLASMNLYSDETRHGFEHTLSWLNQWACSRNFGLGTRIPWDEDFLVESLSDSTIYMAYYTVAHLLQKGDMYGTDHSSVKPEQLTDEVWEFLFCNGPYPENSSLSSSLLKEMKQEFDYWYPFDLRVSGKDLIQNHLTFCIYNHTAIFPKHHWPRGFRCNGHIMLNSEKMSKSTGNFRTLRQGIEEFSADATRFALADAGDGMDDANFVFET…	0	0	2	2	0	0	0	0	0
NbS00007972g0022.1 protein AED:0.13 eAED:0.14 QI:301|0.88|0.89|0.94|0.94|0.89|19|0|1006; (*GB) gi|225455135|ref|XP_002267350.1| (e_value=0.0) PREDICTED: golgin candidate 5-like isoform 1 [Vitis vinifera];; (*SWP) sp|Q0WVL7|GOGC5_ARATH (e_value=0.0) Golgin candidate 5 OS=Arabidopsis thaliana GN=GC5 PE=1 SV=1;; (*TAIR) AT1G79830.3 (e_value=0.0) | Symbols: GC5 | golgin candidate 5 | chr1:30028110-30…	MAWFSGKLDLGNLDLAGAVNKLSESVKNIEKNFDTALGLEEKSDESTSTEASGLWPSSTDRKALFDPVMAFMGQKGGETAVESIEKAESSKPTLLTEEVVKDSAESTVRHDVVPKEPKEETRDVIEQNNSAEEANEEAQHVDEKPNQKISAEEENEEARAADVKLDSAMETKVEREEQRSAIRPDERKAEIDSVAEASEVNLGHAQEKSPEIPQKNIPEEKSSENLELVVSQTSNALSQTEVGIPLLGDSQENTDDDREQKKDVTDESPLVQSQDASSDRAESGRPSVSDSVTASEDGSVEEHSNRSFLGDQHTDEVQKRVSESFMHENESVSRPVGNTQRGNDHETDVKEQRLSSGSNSSDVTDTVVELEKLKKEMKMMETALQGAARQAQAKADEIA…	0	0	2	2	0	0	0	0	0
NbS00009383g0005.1 protein ; (*GB) gi|359487776|ref|XP_002284915.2| (e_value=3e-58) PREDICTED: branched-chain-amino-acid aminotransferase-like protein 2 [Vitis vinifera];; (*SWP) sp|Q9ASR4|BCAL2_ARATH (e_value=7e-55) Branched-chain-amino-acid aminotransferase-like protein 2 OS=Arabidopsis thaliana GN=At5g27410 PE=2 SV=1;; (*TAIR) AT5G27410.1 (e_value=6e-56) | Symbols: | D-aminoacid aminotransfera…	MGEEAEVIHSWSAPRSLSTSLMYSFAQRNDIEVLDEPLYANFLRVTGADRPYKEELRSRMENDGNRVVKEVIFGAGVKKYRYCKHIAKQRVPGLTNELMKRGKHFILIRNPLDIL	0	0	2	2	0	0	0	0	0
NbS00016411g0025.1 protein AED:0.17 eAED:0.18 QI:43|0.37|0.33|1|0.62|0.55|9|0|1136; (*GB) gi|374095601|gb|AEY85028.1| (e_value=0.0) putative ATP-binding protein [Camellia sinensis];; (*SWP) sp|Q54BC9|DYRK2_DICDI (e_value=1e-38) Probable serine/threonine-protein kinase dyrk2 OS=Dictyostelium discoideum GN=dyrk2 PE=3 SV=1;; (*TAIR) AT1G73460.1 (e_value=0.0) | Symbols: | Protein kinase superfamily p…	MGDSNSVDVILEFLRKNKFTRAEAALRGELNNRPDLNDVYKETSSRSSGEISKELIVKEIECGSGRNGSDCNWKNVQEQKKVNECLGTSDKNFSFANSSEDTIDLYSWKYTPVNGPVTSYQNDSGNTGTIDLSGLVRSGKSKLNSSEVFDSSKTHAKYEEDVSFSEKRTSWPGSTSKDTVEPKHDSSRTIELKEVDHQIKLSGACSKGVIINNPWLKSDEFTHPSSEPWKDCTVKTVFPFPKGDVSTSYDHDISSTDKKEGKRKTEVSDVRAAIKEQVDEVGKALFLGKTQGSEPKEFSGLGFSFVSESQKEGFPRLAPVRLKSEEKSFSIPWEEKFERGGPASRISNADDTYFIGGKRPAGGSWLSVSQGIAEDTSDLVSGFATIGDGLSESIDYPNE…	0	0	2	2	0	0	0	0	0
NbS00030235g0005.1 protein AED:0.07 eAED:0.08 QI:11|0.8|0.45|1|1|1|11|0|1787; (*GB) gi|359489318|ref|XP_002269466.2| (e_value=0.0) PREDICTED: eukaryotic translation initiation factor 4G-like [Vitis vinifera];; (*SWP) sp|Q76E23|IF4G1_ARATH (e_value=0.0) Eukaryotic translation initiation factor 4G OS=Arabidopsis thaliana GN=EIF4G PE=1 SV=2;; (*TAIR) AT3G60240.2 (e_value=0.0) | Symbols: EIF4G, CUM2 …	MSHNQSRADTRESSQYRRTGRSGSFNQHRGGNKGSGGGGGGSGAAPPVSSTTNRSLSSNRSFNKKYNSAQGGQHRVSGANAGSDSHQNGAHHHQQQALHEASDVVPVTSANAPVLGAPVQQTDASTQKITRAVPRAPTSNVAASTSESTAPVTPAKTSGDASRSFPLQFGTISPGVMNVLQIPARTSSAPPNLDEQKRAQARSDTSRAIPSLPTPSTSNQPMPRKDAGPRNQSTPGEFHGVTTKPKRDVQVSAPPPVTQTQKPSAHPMPGMHMQIPFHQPPQVPVQFGGPGPQIPSHSMSATSLPMPMHLPIGTPPMQQPMSVSGLQPHPMQSQGMMHQGQGLNFSSGVGPQLPPQLGNMGMNMPSQFPQHQAGKYLGARKTVKITHPETHEELRLDGT…	0	0	2	2	0	0	0	0	0
NbS00050844g0003.1 protein AED:0.04 eAED:0.04 QI:243|1|0.33|1|1|1|3|0|358; (*GB) gi|83283995|gb|ABC01905.1| (e_value=0.0) fructose-bisphosphate aldolase-like protein [Solanum tuberosum];; (*SWP) sp|P17784|ALF_ORYSJ (e_value=0.0) Fructose-bisphosphate aldolase cytoplasmic isozyme OS=Oryza sativa subsp. japonica GN=FBA PE=1 SV=2;; (*TAIR) AT2G36460.1 (e_value=0.0) | Symbols: | Aldolase superfamily …	MSCYKGKYTDELIANAKYIGTPGKGILAADESTGTIGKRFSSINVENVESNRRALRELLFTTPGAVQYLSGVILFEETLYQKTASGKPFVDVLKEGGVLPGIKVDKGTVELPGTNGETTTQGLDGLAERCQKYYEAGARFAKWRAVLKIGANEPSQLAINENANGLARYAIICQQNGLVPIVEPEILVDGSHDINKCADVTERVLAACYKALNDHHVLLEGTLLKPNMITPGSEAAKVAPEVIAEYTIRALQRTMPAAVPAVVFLSGGQSEEEATVNLNAMNKLQTKKPWSLSFSFGRALQQSTLKAWAGKEENVQMAQAAFLTRCKANSEATLGKYAGATNLSEGASESLHVKDYKY	0	0	6	0	0	0	0	0	0
NbS00004609g0115.1 protein AED:0.28 eAED:0.28 QI:0|1|0|1|1|1|2|0|298	MGFPANSEKPFKFLIYGRTGWIGGVLGKLCEAQGIDYVYGSGRLENRSSLESDISTIKPTHVFNAAGVTGRPNVDWCESHKVETIRTNVVGTLTLADVCREKGLILINYATGCIFEYDAGHPLGSGIGFKEEDTPNFTGSFYSKTKAMVEELLKNYDNVCTLRVRMPISADLTNPRNFITKITRYDKVVDIPNSMTILDELLPISLEMAKRNLTGIWNFTNPGVVSHNEILEMYRDYVDPSFSWKNFTLEEQAKVIVAPRSNNELDASKLSKEFPEMKSIKESLIEYVFKPNRKTPVA	0	0	5	0	0	0	0	0	0
NbS00051823g0014.1 protein AED:0.22 eAED:0.22 QI:314|0.77|0.86|1|0.72|0.69|23|393|1465; (*GB) gi|359482723|ref|XP_003632816.1| (e_value=0.0) PREDICTED: protein KIAA0664 homolog [Vitis vinifera];; (*SWP) sp|B4MY63|K0664_DROWI (e_value=5e-31) Protein KIAA0664 homolog OS=Drosophila willistoni GN=GK22132 PE=3 SV=1;; (*TAIR) AT1G15290.1 (e_value=0.0) | Symbols: | Tetratricopeptide repeat (TPR)-like su…	MAPRSGRGKGNKAKTDKKKKEEKVIPSILDISVVTPYETEVVLKGISTDKILDVRKLLAANVETCHFTNYSLSHEVKGPKLNDRIDIATLKPCLLRMDEEDYTEESQAVDHVRRLLDIVACSTRFAKAKAGKVTTPSAASSGTESRAKKHKVQRNASSRPASPSDGVAPSSPSASVAQEENEMVAIHPIPKLSDFYEFFSLSNLSPPILSLKRVDCNDAKTRRDGDYFELQIKICNGKTLQVVAAAKGFYTLGKPLMRSHCLVDLLQQLSQAFANANGFSLQAYESLMKAFTEHNKFGNLPYGFRANTWLVPPSVVDSASNFIPLPVEDENWGGNGGGQGRNGEHDHRSWATDFAVLANLPCKTEEERVVRDRKAFLLHNLFLDVSIFKAVSAIYKVMD…	0	0	4	1	0	0	0	0	0
NbS00040024g0009.1 protein AED:0.21 eAED:0.22 QI:0|0.75|0.4|1|0.75|0.6|5|0|969; (*GB) gi|109659810|dbj|BAE96752.1| (e_value=0.0) nitrate reductase 2 [Nicotiana benthamiana];; (*SWP) sp|P08509|NIA2_TOBAC (e_value=0.0) Nitrate reductase [NADH] 2 OS=Nicotiana tabacum GN=NIA2 PE=2 SV=2;; (*TAIR) AT1G37130.1 (e_value=0.0) | Symbols: NIA2, B29, NIA2-1, CHL3, NR, NR2, ATNR2 | nitrate reductase 2 | chr1:…	MAASVENRQFSHLEAGLSRSFKPRSDSPVRGCNFPSPNSTNFQKKPNSTIYLDYSSSEDDDDDDEKNEYLQMIKKGNSELEPSVHDTRDEGTADNWIERNFSMIRLTGKHPFNSEPPLNRLMHHGFITPVPLHYVRNHGPVPKGTWDDWTVEVTGLVKRPMKFTMDQLVNEFPSRELPVTLVCAGNRRKEQNMVKQTIGFNWGAAAVSTTIWRGVPLRALLKRCGIFSKSKGALNVCFEGADVLPGGGGSKYGTNSKKEFAMDPARDIIIAYMQNGEWHLTTGFQIYWRKNGEMDKGTLNVCFEGADVLAGGGGSKYGTSIKKEFAMDPARDVIVAYMQNGEKLTPDHGYPVRMIIPGFIGGRMVKWIKRIIVTTQESDSYYHFKDNRVLPPHVDAELA…	0	0	3	0	0	0	0	0	0
NbS00003137g0111.1 protein AED:0.12 eAED:0.15 QI:332|0.75|0.66|1|0.75|0.55|9|0|1153	MKKSNFLRSSKEMLTKSFNSAKCKTSLKLASSRLKLLKNKKEVAVKQMKREVAQLLDSGQDRTARIRVEHVVREEKMIAAYDLIEIYCELIVARLPIIESQKNCPIDLKEAITSVVFASPRCGDIPELLDVRKHFTAKYGKEFISAAVELRPDCGVSRMTKIRILGAIAVEHGVQWDPKSVEEAESVPPNDLLNGFGSLQKAGSIHEDPPHSEAADVRTPLDHGNRPNASPNILEQNARSSLRTQNFNSAHGGGRGITPSSNYHHGVGPSGFRDEGLEGEQSFPADGNFSVGRQNWNMEFKDATSAAQAAAESAERASLAARAAAELSRFTRQYSSESQRSEVQSSGGGRGPGMYDTSSREQLHKDSSTSSLPDRNPRFQNERIDSLQHEDLARARRQF…	0	0	3	0	0	0	0	0	0
NbS00020510g0008.1 protein AED:0.28 eAED:0.28 QI:155|0.94|1|1|0.88|0.89|19|279|422; (*GB) gi|17402533|dbj|BAB78700.1| (e_value=0.0) UDP-glucose pyrophosphorylase [Nicotiana tabacum];; (*SWP) sp|P19595|UGPA_SOLTU (e_value=0.0) UTP--glucose-1-phosphate uridylyltransferase OS=Solanum tuberosum PE=1 SV=3;; (*TAIR) AT3G03250.1 (e_value=0.0) | Symbols: UGP, UGP1, AtUGP1 | UDP-GLUCOSE PYROPHOSPHORYLASE …	MATATLSPVDTDKLANLKSAVASLNQISENEKSGFINLVGRYLRSVIEVRNGLTFLDLIVKQIEALNAKYGCTVPLLLMNSFNTHDDTLKIVEKYANSNIEIHTFNQSQYPRLVTEDFSPLPCKGNSGKDGWYPPGHGDVFPALANSGKLDALLAKGKEYVFVANSDNLGAIVDLKILNHLIQNKNEYCMEVTPKTLADVKGGTLISYEGKVQLLEIAQVPDEHVNEFKSIEKFKIFNTNNLWVNLNAINRLVEADALKMEIIPNPKEVDGVKVLQLETAAGAAIKFFDRAIGVNVPRSRFLPVKATSDLLLVQSDLYTLTDEGYVIRNPARSDPSNPSIELGPEFKKVANFLGRFKSIPSIIELDSLKVTGDVWFGSGITLKGIVIVAAISGVKLEIP…	0	0	3	0	0	0	0	0	0
NbS00018463g0105.1 protein AED:0.19 eAED:0.19 QI:107|1|1|1|0.86|0.93|16|293|628	MENLEIKAKSENKAKSEKKGKSENKPSTQSQKHAAAGDEDMDPTQYFENRLKALEAEKATGKNPYPHKFEHKVELLSIPDYVKKYGVLESGAHSADEVSLAGRIMNKRASSAKLLFYDLHGGGAKVQVMASARDSELNEDVFIRFHSGVKRGDIVGITGCPGKSKRGELSIFPKSFEVLSHCLHMMPRQKGAQTDTTKKIEAWVPGSGRNPDTYVLKDQETRYRQRYLDLMLNSEIRYIFKTRAKIITYIRSFLDNRDFLEVETPMMNMIAGGAAARPFVTHHNDLNMRLFMRIAPELYLKELVVGGLDRVYEIGKQFRNEGIDLTHNPEFTTCEFYMAYADYNDLMDLTEKMLSGMVKELTGGYIIKYHAKGLENDPIEIDFTPPFRRIDMVEELEKV…	0	0	3	1	0	0	0	0	0
NbS00009059g0003.1 protein AED:0.01 eAED:0.02 QI:0|-1|0|1|-1|1|1|0|268; (*GB) gi|225444776|ref|XP_002279848.1| (e_value=6e-93) PREDICTED: uncharacterized protein LOC100249118 [Vitis vinifera];; (*TAIR) AT2G31670.1 (e_value=4e-86) | Symbols: | Stress responsive alpha-beta barrel domain protein | chr2:13472699-13473490 REVERSE LENGTH=263;; (*ITAG) Solyc07g041490.1.1 (e_value=1e-161) evidence_code:1…	MVGLKTSGPAPPTPCSHFLSLNPTAATFRHFKPYSSFRSIKMSAEQIVEHVVLFKAKPDVDPSKLSAMASNLNSLTSLNQVVHLSAGPLIRDRSSSFSFTHILHSRYKSISDLADYSAHPDHVSVVKEYVLPVVDDIMAVDWIPTDFSGPSEVPPGSALRVTFLKLKENLGENEKSQVLSAVGGIKEKFPGIEQLTVGENFSPGRAKGFSIASIAVFKGVNELEALESQTELANEQKEKVRDFLDGVVVVDYAVLPTQSPSLSVKISK	0	0	2	0	0	0	0	0	0
NbS00026335g0001.1 protein AED:0.30 eAED:0.30 QI:0|0.5|0|1|1|1|3|0|413; (*GB) gi|325516246|gb|ADZ24701.1| (e_value=0.0) 4-hydroxyphenylpyruvate dioxygenase 2 [Solanum pennellii];; (*SWP) sp|O23920|HPPD_DAUCA (e_value=0.0) 4-hydroxyphenylpyruvate dioxygenase OS=Daucus carota PE=2 SV=1;; (*TAIR) AT1G06570.1 (e_value=9e-180) | Symbols: PDS1, HPD | phytoene desaturation 1 | chr1:2012015-2013543 REVER…	MGKLETVATTSTAAADESPELTTNFKLVGFKNFIRTNPRSDFFSVKRFHHIEFWCGDATNTARRFSWSLGMPIAAKSDLSTGNSVHASYLLRPVSGSLQFLFTAPYSPSISTPSSAAIPSFSTSTHRSFTTTHGLGVRAVALEVENAYTAFSASISRGAKPMFEPVTIDERVAVAEVHLYGDVVLRFVSYLKDADSLVFLPVDYIKRFTGFHEFAEFTAEDVGTAESGLNSMVLANNDETVLLPLNEPVYGTKRKSQIQTYLEHNEGAGMQHLALVTEDIFKTLTEMRKRSGVGGFEFMPSPPPTYYKNLKNRAGDVLTDEQIQACKELGILVDRDDQGTLLQIFTKPVGDRPTIFIEIIQRIGCMLKDEKGQVYQKGGCGGFGKGNFSELFRSIEEYE…	0	0	2	0	0	0	0	0	0
NbS00003561g0007.1 protein AED:0.06 eAED:0.08 QI:0|0|0.5|1|1|1|2|0|633; (*GB) gi|224057202|ref|XP_002299170.1| (e_value=0.0) predicted protein [Populus trichocarpa];; (*SWP) sp|Q1RMH9|DNJC2_BOVIN (e_value=2e-45) DnaJ homolog subfamily C member 2 OS=Bos taurus GN=DNAJC2 PE=2 SV=1;; (*TAIR) AT3G11450.1 (e_value=0.0) | Symbols: | DnaJ domain ;Myb-like DNA-binding domain | chr3:3605459-3607402 REVERS…	MASRRSIRLISYSEELINGEPIYISSNCFPIKALKYEPAGLSFHSAALRLSGHVEKEVSKDSKEDVPTEKEQSFTYSSESYSSKGKKKSSTGEKVQDHYALLGLSHLRYLASEDQIRKSYRDAALRHHPDKLASLLLAEETEAAKQAKKEEIENHFKAIQEAYEVLIDPVRRRIYDSTDEFDDEIPTECAPQDFFKVFGPAFLRNGRWSVTQPVPSLGDENTPIKEVDSFYNFWYSFKSWREFPHADEFDLEQAESRDHKRWMERQNAKLSEKARKEEVARRDPRILGRKEAEKAEKQKKKEAKLLAKKLQEEEAARIAEEEKRKKEEEGKRAAEVALQQKKLKEKEKKLLRKERSRLRTLAAPVLSQRLLGLADDDIEGLCMSLDIEQLRNLCDKADG…	0	0	2	1	0	0	0	0	0
NbS00047538g0010.1 protein AED:0.04 eAED:0.07 QI:0|1|0.66|1|1|1|3|0|463; (*GB) gi|11493393|gb|AAG35472.1|U67064_1 (e_value=0.0) sulfur [Nicotiana tabacum];; (*SWP) sp|O22436|CHLI_TOBAC (e_value=0.0) Magnesium-chelatase subunit chlI, chloroplastic OS=Nicotiana tabacum GN=CHLI PE=2 SV=1;; (*TAIR) AT4G18480.1 (e_value=0.0) | Symbols: CHLI1, CH42, CH-42, CHL11, CHLI-1 | P-loop containing nucleoside t…	MASLLGTSSSAAAAAILASTPLSSRSSKSSIFSLFPSSGQCQGRKFYGGIRIPVKKGRSQLHVAISNVATEVSPAQEQGQKLAEESQRPVYPFAAIVGQDEMKLCLLLNVIDPKIGGVMIMGDRGTGKSTTVRSLVDLLPEIKVISGDPFNSDPDDQEVMSAEVRDKLRSGEKLPISRTKINMVDLPLGATEDRVCGTIDIEKALTEGVKAFEPGLLAKANRGILYVDEVNLLDDHLVDVLLDSAASGWNTVEREGISISHPARFILIGSGNPEEGELRPQLLDRFGMHAQVGTVRDAELRVKIVEERARFDKNPKEFRESYKAEQEKLQNQIDSARNALSAVTIDHDLRVKISKVCAELNVDGLRGDIVTNRAARALAAPAHDLRVKISKVCAELNVD…	0	0	2	1	0	0	0	1	0
NbS00035704g0012.1 protein AED:0.16 eAED:0.16 QI:72|0.5|0.4|1|0.5|0.6|5|0|785; (*GB) gi|12060550|gb|AAG48162.1|AF154425_1 (e_value=0.0) phospholipase D [Solanum lycopersicum];; (*SWP) sp|Q41142|PLDA1_RICCO (e_value=0.0) Phospholipase D alpha 1 OS=Ricinus communis GN=PLD1 PE=1 SV=1;; (*TAIR) AT3G15730.1 (e_value=0.0) | Symbols: PLDALPHA1, PLD | phospholipase D alpha 1 | chr3:5330835-5333474 FORWAR…	MAQILLHGTLHATIFEVDKIHTNFGKELFNKVVQGIEGAIGFNKTASRLYATIDLQKARVGRTRLLDDHKNPRWYESFHIYCAHMAADVIFTVKIDNPIGAELIGRAYLPVQELLDGEEVDKWLEILDTERKPVHGHSKIHVKLQFFNVTREYNWNRGIKVTRFPGVPYTFFSQRQGCKVTLYQDSHVPDNFIPKIPLAGGKFYEPQRCWEDIFDAITNAKHLIYITGWSVYTEITLIRDTRRPKPGGDLTLGELLKKKANEGVRVLMLVWDDRTSVGLLKQDGLMATHDEDTAKFFQDTEVNCVLCPRNPDDGRSIIQNIEIGTMFTHHQKIVVVDGEMPNGDKERRRIVSYIGGIDLCDGRYDTQFHSLFRTLNTAHHDDFHQANFSGASIQKGGPR…	0	0	4	1	0	0	0	0	0
NbS00009143g0001.1 protein AED:0.06 eAED:0.15 QI:0|0|0|1|1|1|2|0|276; (*GB) gi|76573333|gb|ABA46771.1| (e_value=2e-106) unknown [Solanum tuberosum];; (*SWP) sp|Q9M354|AGD6_ARATH (e_value=7e-93) Probable ADP-ribosylation factor GTPase-activating protein AGD6 OS=Arabidopsis thaliana GN=AGD6 PE=1 SV=1;; (*TAIR) AT3G53710.2 (e_value=5e-94) | Symbols: AGD6 | ARF-GAP domain 6 | chr3:19903730-19905419 R…	MAASRRLRDLQAQPVNKICVDCSQKNPQWASVSYGVFMCLECSGKHRGLGVHISFVRSVTMDSWSEIQLKKMELGGNDNLNKFMAQYGISYLIRPIRYNGLMVRDPAQKNGARRIQSLAEDKPWRDPPVVKEGNNSSSKPKPPLSGSRNGNYGGNSDSGWDNWDSFDAGGVNGGNNSSNMRRNQTVSDFRSGGGSGGGPARSRSTNDFTQDQYEASAANKDNFFARKMAENESRPDGLPPSQGGKYVGFGSSPAPMPRNNYNNNLQGDVLSAVTQV	0	0	3	1	0	0	0	0	0
NbS00016274g0025.1 protein AED:0.18 eAED:0.18 QI:0|0.87|0.77|1|0.87|0.77|9|262|497; (*GB) gi|225428661|ref|XP_002284886.1| (e_value=0.0) PREDICTED: uncharacterized protein LOC100262433 [Vitis vinifera];; (*TAIR) AT2G15860.1 (e_value=9e-165) | Symbols: | unknown protein; FUNCTIONS IN: molecular_function unknown; INVOLVED IN: biological_process unknown; LOCATED IN: cellular_component unknown; EXPRE…	MAENTTKPSNEEIVEKQEQAPQPPPQGGGGGGWGGWGFSAFSYISDIQKAATTAAEEISRNAVEAAKIAAKSLADVQDASEDSETSKEDVREVLVEEESEDENDKKRKAALEKLEKAIIDHSVENFASGAWQALGNAFKGGSDLVHKLEESALSIAESVQHGGLPATTGSAAPSILETGKAFTAKGMHALELLGKETMDLLISETGIGVDLNTKEGGGRTDEDQFYEEVTFDRCFYIYGGPEQLEELEALSNHYALLFNRRKAKLPSDQWSSYDGKLKEVEQIFDLSSEVYGSSTESGKGKKVESCIADSTDEVKNLHDSSVNKAAELAAGFTNVLVGLASDDMIQRTARRLDTLHSEGVHRLSELCCFAVSQLVMLGKSIISTANKAVDQDADAEIVK…	0	0	3	1	0	0	0	0	0
NbS00010018g0004.1 protein AED:0.26 eAED:0.26 QI:255|0.9|0.81|1|0.8|0.72|11|0|472; (*SWP) sp|Q9FL69|AGD5_ARATH (e_value=1e-146) Probable ADP-ribosylation factor GTPase-activating protein AGD5 OS=Arabidopsis thaliana GN=AGD5 PE=1 SV=1;; (*TAIR) AT5G54310.1 (e_value=1e-147) | Symbols: NEV, AGD5 | ARF-GAP domain 5 | chr5:22057262-22061066 REVERSE LENGTH=483;; (*ITAG) Solyc07g063550.2.1 (e_value=0.0)…	MNEKANVTKELNAKHRKILEGLLKLPENRECADCKAKGPRWASVNLGIFICMQCSGIHRSLGVHISKVRSATLDTWLPEQVAFIQSMGNERSNSYWEAELPPNYDRVGIENFIRAKYEDKRWVPKDGIQKPPSRVQEERASVQWQQNSDRSGRGHATNSGVASDERKNVQAPNTKQDVPAARVSIPLPPRGPEHVSSSQVAYQTNQKAEPVVVAGSIKQVAEATNPPKVDYATDLFDMLSMDSPSDNGLEAASTDDNSWAAAQEATKAEKTGATKTDDQKSQSASASGIEDLFQDLPSILPSASSRKPQKDVKNDIMSLFDKSNMVSPFAMHQQQLAMLAQQQSLLMAAAAAGGAVKIPVNAQQGPNGANMVNQNWPNLGYQFPGVVMPAAGKTEPEKY…	0	0	2	0	0	0	0	0	0
NbS00001627g0011.1 protein AED:0.30 eAED:0.30 QI:0|0.72|0.75|0.83|1|1|12|0|363; (*GB) gi|237506885|gb|ACQ99195.1| (e_value=1e-171) betaine aldehyde dehydrogenase [Lycium barbarum];; (*SWP) sp|Q9STS1|BADH2_ARATH (e_value=2e-148) Betaine aldehyde dehydrogenase 2, mitochondrial OS=Arabidopsis thaliana GN=ALDH10A9 PE=2 SV=1;; (*TAIR) AT3G48170.1 (e_value=1e-149) | Symbols: ALDH10A9 | aldehyde dehydro…	MKRLKGSAAVDTAKDKQILERKSELAKLESLDCGKTLFEAAWDMDDVAASFEYYADLAEALDSKRKTPVDLHLDSFKTYVLREPLGVVGLITPWNYPLLMATWKVAPALAAGCAAILKPSELASITCLELGEICREVGLPPGALNILTGLGPEAGAPLVSHPHVEKIAFTGSGVTGVKIMTAAAQLVKPVTLELGGKSPIVVFDDIDNLDLAVEWTLFGCFANAGQVCSATSRLILQESIASEFLERLLLWIKNIKLSDPLEEDCKLGPIVSSGQYEKVLKFISKAKDEGATILCGGERPQTGIIWLNCSQPTFTQLPWGGRKRSGFGRDLGEWGLENYLNIKQVTQYTSDEPWAFYKSPSKV	0	0	3	0	0	0	0	0	0
NbS00008657g0008.1 protein AED:0.14 eAED:0.14 QI:156|1|1|1|1|1|7|328|362; (*GB) gi|296089136|emb|CBI38839.3| (e_value=0.0) unnamed protein product [Vitis vinifera];; (*SWP) sp|A8N0V8|GET3_COPC7 (e_value=5e-118) ATPase GET3 OS=Coprinopsis cinerea (strain Okayama-7 / 130 / ATCC MYA-4618 / FGSC 9003) GN=GET3 PE=3 SV=1;; (*TAIR) AT1G01910.4 (e_value=0.0) | Symbols: | P-loop containing nucleoside trip…	MASNNNNQDLPEATVQNVLEQDTLKWVFVGGKGGVGKTTCSSILGILLSQVRSSVLIISTDPAHNLSDAFQQRFTKSPTLVNGFSNLYAMEIDPTVEKEDSVTSDGMDDSLSDLTNAIPGIDEAMSFAEMLKLVQTMDYSVIVFDTAPTGHTLRLLQLPSTLEKGLAKVMSLKSRFGGVLSQMTRLLGVDEEFGEAAILGKLEGMKEIIEEVNKQFKDPDLTTFICVCIPEFLSLYETERLVQELAKFEIDTHNILINQVIFDEEVVESKLLKARMRMQQKYLDQFYMLYDDFNITKLPLLPQEVCGVEALKGFSHNFITPYKPFLARGSVEELENRVASLKEQLKDAEAELEKVRKGKQKV	0	0	3	0	0	0	0	0	0
NbS00010979g0005.1 protein AED:0.15 eAED:0.15 QI:0|0.95|1|1|1|1|22|194|1448; (*GB) gi|225437885|ref|XP_002265367.1| (e_value=0.0) PREDICTED: CLIP-associating protein-like [Vitis vinifera];; (*SWP) sp|A1A5G0|CLAP1_XENTR (e_value=1e-45) CLIP-associating protein 1 OS=Xenopus tropicalis GN=clasp1 PE=1 SV=1;; (*TAIR) AT2G20190.1 (e_value=0.0) | Symbols: ATCLASP, CLASP | CLIP-associated protein | chr2:…	MEEALELARAKDTKERMAGVERLHQLLEASRKSLSSSEVTSLVDVCLDLLKDNNFRVSQGALQSLDSAAVLSGEHLKLHFNALVPAVVERLGDSKQPVRDAARRFLLTLMQVSSPTIIVERAGSYAWMHKSFRVREEFARTVTSAIGLFSATELPLQRAILPPILQMLSDPNPGVRDAAISCIEEMYSQAGPQFRDELQRHHLPTMMLKDINARLEKIEPKNRLADGIPRNYSAAEVRPTSLNPKKSSPKAKSSTREVSLFGGDGDIAEKPVDPIKVYSEKELVREFEKIASTLVPEKDWSVRIAAMQRIEALVIGGAIDFPCFRGLLKQLVVPLSTQLSDRRSTIVKQGCHLLSFLSQELLGDFEACAEMFIPVLFKLVVITVLVIAESADTCIKTML…	0	0	3	0	0	0	0	0	0
NbS00019173g0011.1 protein AED:0.32 eAED:0.32 QI:336|0.88|0.94|1|0.64|0.61|18|334|818; (*GB) gi|225428881|ref|XP_002285306.1| (e_value=0.0) PREDICTED: uncharacterized protein LOC100246943 [Vitis vinifera];; (*SWP) sp|Q8T9S7|PTEN_DICDI (e_value=1e-50) Phosphatidylinositol 3,4,5-trisphosphate 3-phosphatase and dual-specificity protein phosphatase PTEN OS=Dictyostelium discoideum GN=pteN PE=2 SV=1;;…	MDSGSADVSDSQPVTASNAARSTAVDSAPGQSTEEVPSKLSTSGISSWAKNLKIPQPFTGSQDEQSSGNAAKSTFARFTGGLGMRMSPKSPTDENSEGTATSPSSFIGTFTKGLVDSSKNAVKAVQVKARHVVSQNKRRYQEGGFDLDLTYITENIIAMGFPAGDMSSGIFGYVEDKYKVYNLCSERLYDASLFEGKVACFPFDDHNCPPIQLIISFCQSAYSWLKEDIENVVVVHCKAGMARTGLMISSLLLYLKFFPTAEESMDYYNQKRCVDGKGLVLPSQIRYVKYFERILMYFNGENQPGRRCMLRGFRLHRCPYWIRPSITVSDHNGVLFSTKKHPRTKELSPEDFWFSAPKKGVMVFALPGEPGLAELAGDFKIHFHDGQGDFYCWLNTTMI…	0	0	3	0	0	0	0	0	0
NbS00023957g0008.1 protein AED:0.30 eAED:0.30 QI:319|0.82|0.77|1|0.76|0.77|18|424|477; (*GB) gi|159459932|gb|ABW96363.1| (e_value=0.0) glutathione reductase [Ipomoea batatas];; (*SWP) sp|Q43621|GSHRC_PEA (e_value=0.0) Glutathione reductase, cytosolic OS=Pisum sativum PE=2 SV=1;; (*TAIR) AT3G24170.3 (e_value=0.0) | Symbols: ATGR1, GR1 | glutathione-disulfide reductase | chr3:8729762-8734115 REVERS…	MARKMLIDGELEKSDQEEQHYDFDLFVIGAGSGGVRAGRFSAQYGAKVAICELPFHPISSELSGGVGGTCVIRGCVPKKILVYGAAYGPELEDARNYGWEVNERVNFNWKKLLHKKTEEIVRLNGIYKRLLSNAGVKLFEGEGRVIGPNEVEVIQLDGTKINYSAKHILIATGSRAHRPGIPGQELAITSDEALSLEELPKRVVILGGGYISVEFASIWRGMGATVDLCFRKELPLRGFDDEMRAAVARNLEGRGITMHPCTTLTKLEKTEDGIKVHTDHGEVILADVVLFATGRLPNTKRLNLDAVGVELDKMQAVKVDEYSRTNVPSIWAIGDVTNRMNLTPVALMEGTCFAKTVFGGKPTKPDYLHIPCAVIPPLSVVGLSEEQAIEQVNGEVSVY…	0	0	3	0	0	0	0	0	0
NbS00027404g0011.1 protein AED:0.07 eAED:0.08 QI:0|1|0.8|1|1|1|5|0|602; (*GB) gi|255565409|ref|XP_002523695.1| (e_value=0.0) ATP-dependent transporter, putative [Ricinus communis];; (*SWP) sp|Q9FJH6|AB1F_ARATH (e_value=0.0) ABC transporter F family member 1 OS=Arabidopsis thaliana GN=ABCF1 PE=1 SV=1;; (*TAIR) AT5G60790.1 (e_value=0.0) | Symbols: ATGCN1, GCN1 | ABC transporter family protein | chr…	MVSDAAKKRDAQKKAAAAARRGGKGAAASSKTVATASKAAPETNGVDNLTNEVGHLHISDRNCTGVLCSHPLSRDIRIQSLSVTFHGHDLIVDSELELNYGRRYGLLGLNGCGKSTLLTAIGLRELPIPEHMDIFHLSREIDASDMSALEAVINCDEERLKLEKEAEALAGQDDGGGEQLERIYERLEAMDAATAEKRAAEILFGLGFDKKMQAKKTCDFSGGWRMRISLARALFMNPTILLLDEPTNHLDLEACVWLEESLKNFERILVVISHSQDFLNGVCTNIIHMQNKKLKLYTGNYDQYVQTRSELEENQMKQYKWEQEQIASMKEYIARFGHGSAKLARQAQSKEKTLAKMERGGLTEKVGRDSVLVFRFTDVGKLPPPVLQFSEVAFGYTPE…	0	0	3	0	0	0	0	0	0
NbS00041061g0004.1 protein AED:0.10 eAED:0.10 QI:221|1|0.66|1|0.8|0.66|6|0|504; (*GB) gi|224070913|ref|XP_002303293.1| (e_value=2e-86) predicted protein [Populus trichocarpa];; (*SWP) sp|Q0WVL7|GOGC5_ARATH (e_value=4e-49) Golgin candidate 5 OS=Arabidopsis thaliana GN=GC5 PE=1 SV=1;; (*TAIR) AT1G79830.4 (e_value=3e-50) | Symbols: GC5 | golgin candidate 5 | chr1:30028110-30033508 REVERSE LENGTH=976…	MAWFSGKLDLGNLDLAGAVNKLSESVKNIEKNFDTALGLEEKSDESTSTEASGLWPSSTDRKALFDPVMAFMGQKGGETTVESIEKAESSKPTLPTEEVVEDSAESTVQHDVVPKEPKEETRDAIEQTKSAEEANEEAQNVDEKPNQKISAEEENEEVRAADVKLDSAMETKVERVEQRSAIRPDEIKAEIDSVAEASEVNLDHAQEKSPEIPQKNIPEEKSSENLELVASQTSNALSQTEVAIPLLVDSQENTDDGREQKKEVTDESPLVQSQDASSDRADREEKKEVTEESPPVQSQDASSERAESGRPSVSDSVTASEDGSVEEHSKRSFLGDQHTDEGRKRVSESVMHENESVSRLVGDTQRGNDHETDVKEQRLSSGSNSSDVTDTVVELEKLK…	0	0	3	0	0	0	0	0	0
NbS00008235g0004.1 protein AED:0.25 eAED:0.25 QI:200|0.95|0.82|1|0.90|0.82|23|470|1288; (*GB) gi|356567769|ref|XP_003552088.1| (e_value=0.0) PREDICTED: geminivirus Rep-interacting motor protein-like [Glycine max];; (*SWP) sp|Q9LX99|GRIMP_ARATH (e_value=0.0) Geminivirus Rep-interacting motor protein OS=Arabidopsis thaliana GN=GRIMP PE=1 SV=1;; (*TAIR) AT5G65460.1 (e_value=0.0) | Symbols: KCA2, KAC…	MAEQKSNNNNNRWSWDVPGFQPRKSTTEHEDYHRPSPAPEDYTDLRQEASDLQEYSNAKLDRVTRYLGVLADKTRKLDQAALETEARISPLILEKKKLFNDLLTAQGNIKVFCRVRPLFEDEGPSIVEFPDDVTLRISTADDSIDNPKKDFEFDRVYGPHVGQVELFSDVQPFVQSAFDGYNVAIFAYGQAHSGKTHTMEGSSHDRGLYARCFEELFDLSNSDATSTSKYNFSVSISELHNEQMQDLLIQSGNDLPKARMGSLDYFVEFLQEKVENPMDFGRVLKLAFQNRGSDTSKFRVSHLIITVHIHYTNLITGETSYSKLSLVDLAVSESTVEEDWGDHATELLHVMKSLSALGDVLNSLTSKKDIVPYGNSALTKVLADSLGGSAKTLLIVNIC…	0	0	3	1	0	0	0	0	0
NbS00012742g0007.1 protein AED:0.30 eAED:0.30 QI:467|0.95|0.95|1|0.80|0.81|22|646|944; (*GB) gi|225441852|ref|XP_002284163.1| (e_value=0.0) PREDICTED: villin-2-like [Vitis vinifera];; (*SWP) sp|O81644|VILI2_ARATH (e_value=0.0) Villin-2 OS=Arabidopsis thaliana GN=VLN2 PE=1 SV=2;; (*TAIR) AT2G41740.1 (e_value=0.0) | Symbols: VLN2, ATVLN2 | villin 2 | chr2:17410962-17416878 REVERSE LENGTH=976;; (*IT…	MSSSAKALDPAFQGAGQRVGTEIWRIEDFQPVPLPKSDYGKFYSGDSYLILQTTSGKGGAYLYDIHFWLGKDTSQDEAGTAAIKTVELDAVLGGRAVQYREIQGHESDKFLSYFKPCIIPLEGGIASGFKKPEEEEFETRLYICKGKRVVRMKQVPFSRSSLNHDDVFILDTNDKIYQFNGANSNIQERAKALEIIQFLKEKYHEGTCDVAIVDDGNLQAESDSGSFWVLFGGFAPISKKVVTEDDIVPEKTPPKLYSINGQVSPMDGELSKSSLENNKCYLLDCGAEVYVWVGRVTQLEERKAAIQTAEEYLVSHNRPKATHVTRVIQGYEPHSFKSNFDSWPSGSAPVPEEGRGKVAALLKQQGVGVKGASNSAPAIEEVPPLLEGGGKVEVWRING…	0	0	3	1	0	0	0	0	0
NbS00034083g0006.1 protein AED:0.17 eAED:0.17 QI:0|0.5|0|0.66|1|1|3|0|461; (*GB) gi|2497543|sp|Q42954.1|KPYC_TOBAC (e_value=0.0) RecName: Full=Pyruvate kinase, cytosolic isozyme; Short=PK;; (*SWP) sp|Q42954|KPYC_TOBAC (e_value=0.0) Pyruvate kinase, cytosolic isozyme OS=Nicotiana tabacum PE=2 SV=1;; (*TAIR) AT5G56350.1 (e_value=0.0) | Symbols: | Pyruvate kinase family protein | chr5:22820254-22822…	MENTGILCAVMLDTKGPEIRTGFLKDAKPVQLKQGQEITISTDYSIKGDENMICMSYKKLAEDVKPQSVILCADGTITFTVLSCDKENGLVRCRCENTAVLGERKNVNLPGVIVDLPTLTDKDKDDILNWGVPNHIDMIALSFVRKGSDLVGGVPNHIDMIALSFVRKGSDLVQVRKLLGEHAKNILLMSKVENQEGVANFDDILLNSDAFMVARGDLGMEIPIEKIFLAQKVMISKCNIQGKPVVTATQMLESMIKSPRPTRAEATDVANAVLDGTDCVMLSGETAAGAYPDLAVGTMAKICIEAESTIDYPDVFKRIMANAPVPMSPLESLASSAVRTANSAKAALILVLTRGGSTAKLVAKYRPGMPILSVVVPEIKTDSFDWTCSDESPARHSLI…	0	0	3	1	0	0	0	0	0
NbS00050078g0006.1 protein AED:0.04 eAED:0.08 QI:0|0.57|0.5|1|0.57|0.5|8|0|604; (*GB) gi|255565409|ref|XP_002523695.1| (e_value=0.0) ATP-dependent transporter, putative [Ricinus communis];; (*SWP) sp|Q9FJH6|AB1F_ARATH (e_value=0.0) ABC transporter F family member 1 OS=Arabidopsis thaliana GN=ABCF1 PE=1 SV=1;; (*TAIR) AT5G60790.1 (e_value=0.0) | Symbols: ATGCN1, GCN1 | ABC transporter family prote…	MVSDAAKKRDAQKKAAAAARRGGKGAAASSKAAAAASKAAPETNGVDILTNGVGDLHISDRNCTGVLCSHPLSRDIRIQSLSVTFHGHDLIVDSELELNYGRRYGLLGLNGCGKSTLLTAIGLRELPIPEHMDIFHLSREIDASDMSALEAVINCDEERLKLEKEAEALAGQDDGGGEQLERIYERLEAMDAATAEKRAAEILFGLGFDKKMQAKKTCDFSGGWRMRISLARALFMNPTILLLDEPTNHLDLEACVWLEESLKNFERILVVISHSQDFLNGVCTNIIHMQNKKLKLYTGNYDQYVQTRSELEENQMKQYKWEQEQIASMKEYIARFGHGSAKLARQAQSKEKTLAKMERGGLTEKVGRDSVLVFRFTDVGKLPPPVLQFSEVAFGYTPE…	0	0	3	1	0	0	0	0	0
NbS00015644g0025.1 protein AED:0.09 eAED:0.09 QI:0|1|0.33|1|1|0.33|3|40|829; (*GB) gi|3914361|sp|P93400.2|PLDA1_TOBAC (e_value=0.0) RecName: Full=Phospholipase D alpha 1; Short=PLD alpha 1; AltName: Full=Choline phosphatase 1; AltName: Full=Phosphatidylcholine-hydrolyzing phospholipase D 1;; (*SWP) sp|P93400|PLDA1_TOBAC (e_value=0.0) Phospholipase D alpha 1 OS=Nicotiana tabacum GN=PLD1 PE=2 SV=2;…	ILLHGTLHVTIYEVDNLQKEGGGHFFSKIKEHLEETIGLGKGTPEIYATVDLEKARVGRTRKIKNEPKNPRWYESFHIYCAHMASNVIFTVKDDNPIGATLIGRAYVPVEELLEGEEIDKWVEILDREMNPIEEGSKIHVNLQFFDVSRDPNWARGIRSSKYPGVPYTFFAQRTGCRVSLYQDAHVPDNFIPKIPLAGGCRVSLYQDAHVPDNFIPKIPLSGGKYYEPHRCWEDIFDAITNAKHLIYITGWSVYTEITLVRDSRRQKPGGDITLGELLKKKASEGVKVLMLVWDDRTSVGLLKKDGLMATHDQETEQFFQGTEVNCVLCPRNPDDGGSIVQTLQIGTMFTHHQKIVVVDSELPSGESEKRRILSFVGGIDLCDGRYDTPFHSLFRTLDT…	0	0	7	1	0	0	0	0	0
NbS00014863g0008.1 protein AED:0.16 eAED:0.17 QI:490|0.64|0.44|1|0.82|0.83|18|0|1635; (*GB) gi|359484809|ref|XP_003633167.1| (e_value=0.0) PREDICTED: uncharacterized protein LOC100257033 [Vitis vinifera];; (*SWP) sp|A1ZAB5|K0664_DROME (e_value=3e-13) Protein KIAA0664 homolog OS=Drosophila melanogaster GN=CG8443 PE=1 SV=1;; (*TAIR) AT4G28080.1 (e_value=0.0) | Symbols: | Tetratricopeptide repeat (T…	MAPKTGKAKPHKAKGEKKKKEEKVLPNIIEITVGTSEDSQVLLKGISTDKILDVRKLLAVNVETCHVTNYSLSHEVRGTRLKDTVEIVSLKPCHLSLVEEDYTEEQSVAHIRRLLDIVACTTSFGGSSSSPKPTGRTSSIEPGPENVESKSSKPKSQEPKKAASSPKAKPSKPDATAVCGGADAGDSAEKGDPAMMCPPPRLGQFYDFFSFAHLTPPIQCFYPAGKRALLSHSLVGLLQQLSRVFDAVSKNAYKALMKAFTDHNKGGNGGGQGRDGKHDHRPWAKEFAILAAMPCKTAEERQIRDRKAFLLHSLFVDVSVLKAVAAIKHLADNSQNGTNHSSSYEERIGDLLISVTKDISDASKKLDNKNDGNQVLSMSPEELAKRNLLKGITADESAT…	0	0	4	0	0	0	0	0	0
NbS00002437g0006.1 protein AED:0.08 eAED:0.08 QI:0|0.4|0.33|0.83|0.6|0.5|6|0|1286; (*GB) gi|147862641|emb|CAN81488.1| (e_value=0.0) hypothetical protein VITISV_033286 [Vitis vinifera];; (*TAIR) AT2G32240.1 (e_value=0.0) | Symbols: | FUNCTIONS IN: molecular_function unknown; INVOLVED IN: response to cadmium ion; LOCATED IN: plasma membrane; EXPRESSED IN: 25 plant structures; EXPRESSED DURING: 13 g…	VPNGEAEGQKEHEESAFDGEFIKVEKEVLDSKDDSHAAAETSPAEGKVSEEEHISSISSASREYLEAQEKAKELELELERVAGALKDAESENAKLKDELSFTKEKMQETDKKFEGLELDHKKLQEQIVEAQSRYNTELKALQEALQAQELNSKEHANVKEAFDRLSLEFESSKKKMEELEHELLTSAAEAKKFEELHKQSGSLAESETTRALEFERLLELSKQSAKEVEDQMASLQEELKGLNEKITENQKVEEALTCTASELSRVQGELEISKSQVQDTENKLASKEALIDELSQELDIRKASESQVKEDFLALELVLSSTKEDLQAKVSELEDIKLKLQEEADLKEQYGAKLKSQETQLSVSQEELTKLSTEKGALEAAVAELNNTVIQMKELCGDL…	0	0	4	0	0	0	0	0	0
NbS00022414g0008.1 protein AED:0.20 eAED:0.20 QI:138|0.90|0.91|1|0.81|0.66|12|627|546; (*GB) gi|119866037|gb|ABM05488.1| (e_value=0.0) Impa2 [Nicotiana benthamiana];; (*SWP) sp|Q9SLX0|IMA1B_ORYSJ (e_value=0.0) Importin subunit alpha-1b OS=Oryza sativa subsp. japonica GN=Os05g0155500 PE=1 SV=2;; (*TAIR) AT4G16143.2 (e_value=0.0) | Symbols: IMPA-2 | importin alpha isoform 2 | chr4:9134450-9137134 R…	MSLRPSARTEVRRNRYKVAVDAEEGRRRREDNMVEIRKSKREESLLKKRREGLQPQQQPFPANLHTSTVEKKLESLPSMVAGVWSNDNNLQLEATTQFRKLLSIERSPPIEEVIQSGVVPRFVEFLMREDFPQLQFEAAWALTNIASGTSDNTRVVIDHGAVPIFVKLLGSPSDDVREQAVWALGNVAGDSPRCRDLVLSNGALIPLLAQCRDLVLSNGALIPLLSQLNEHAKLSMLRNATWTLSNFCRGKPQPPFEQVRPALSALQRLFHSNDEEVLTDACWALSYLSDGTNDKIQAVIEAGVCPRLVELLMHPSPSVLIPALRTVGNIVTGDDLQTQCIIEHGALTCLLSLLTHNHKKSIKKEACWTISNITAGNKEQIQAVIEAGLIAPLVNLLQT…	0	0	4	0	0	0	0	0	0
NbS00038220g0008.1 protein AED:0.14 eAED:0.14 QI:120|1|1|1|0.75|0.61|13|641|529; (*GB) gi|119866037|gb|ABM05488.1| (e_value=0.0) Impa2 [Nicotiana benthamiana];; (*SWP) sp|Q9SLX0|IMA1B_ORYSJ (e_value=0.0) Importin subunit alpha-1b OS=Oryza sativa subsp. japonica GN=Os05g0155500 PE=1 SV=2;; (*TAIR) AT4G16143.2 (e_value=0.0) | Symbols: IMPA-2 | importin alpha isoform 2 | chr4:9134450-9137134 REVERSE…	MSLRPSARSEVRRNRYKVAVDAEEGRRRREDNMVEIRKSKREESLLKKRREGLQPQQQPFPANLHTSTVEKKLESLPSMVAGVWSNDNNLQLEATTQFRKLLSIERSPPIEEVIQSGVVPRFVEFLMREDFPQLQFEAAWALTNIASGTSENTRVVIDHGAVPIFVKLLGSPSDDVREQAVWALGNVAGDSPRCRDLVLSNGALIPLLSQLNEHAKLSMLRNATWTLSNFCRGKPQPPFEQVRPALSALQRLVHSNDEEVLTDACWALSYLSDGTNDKIQAVIEAGVCPRLVELLMHPSPSVLIPALRTVGNIVTGDDLQTQCIIEHGALACLLSLLTHNHKKSIKKEACWTISNITAGNKEQIQAVIEAGLIAPLVNLLQTAEFDIKKEAAWAISNAT…	0	0	4	0	0	0	0	0	0
NbS00005355g0006.1 protein AED:0.16 eAED:0.16 QI:275|1|1|1|1|1|2|280|250; (*GB) gi|68500726|gb|AAY98032.1| (e_value=3e-12) ASR4 [Solanum lycopersicum];; (*ITAG) Solyc04g071620.2.1 (e_value=6e-15) genomic_reference:SL2.40ch04 gene_region:56178656-56180338 transcript_region:SL2.40ch04:56178656..56180338+ go_terms:GO:0006950 functional_description:"ASR4 (Fragment) (AHRD V1 *-*- Q2QJU1_SOLLC); contai…	MAEEKKHHFGLFHHKDKEEDKTTYGETPYGGDTEKTTYGENTYEEKTSYGGGDNYGDNKYGEKPGNGESGYGEKTSYAEGGKYGDSGYEKKTTYGDSGYENKTSYGDSGYENKTGYGDIPSETTYGEKTNYGEGDTYGKAAAHSSETTNFEENTDDEGKTGEDYEKEKRHHKHLEHVGGLGAAAAGAFALHEKHKAEKDPEHAHKHKIEEEIAAAAAVGAGGFAFHEHHEKKEAKEEEEEAEGKKKHHFF	0	0	2	0	0	0	0	0	0
NbS00025918g0006.1 protein AED:0.25 eAED:0.25 QI:0|1|0.75|1|1|1|4|0|316; (*SWP) sp|P31237|ACCO_ACTDE (e_value=0.0) 1-aminocyclopropane-1-carboxylate oxidase OS=Actinidia deliciosa GN=ACO PE=2 SV=1;; (*TAIR) AT1G05010.1 (e_value=3e-166) | Symbols: EFE, ACO4, EAT1 | ethylene-forming enzyme | chr1:1431419-1432695 REVERSE LENGTH=323;; (*ITAG) Solyc02g036350.2.1 (e_value=0.0) genomic_reference:SL2.40c…	MESFPVVNMELLNTEQRAATMEKIKDACENWGFFEVVNHGICHELLDTVEKLTKGHYKKCMEQRFKEMVASKGLEAVETEIKDLDWESTFFLKHLPVSNISEVPDLEDEYRKIMKEFAEKLEKLAEQLLDLLCENLGLEQGYLKKAFYGSNGPTFGTKVSNYPPCPKPDLIKGLRAHTDAGGIILLFQDDKVSGLQLLKDDKWIDVPPMRHSIVINLGDQLEVITNGKYKSVEHRVIAQPDGNRMSLASFYNPGSDAVIYPAPELLEKENKVIYPKFVFEDYMKLYAGLKFQAKEPRFEAMKAVETTVNSAPIATV	0	0	2	0	1	0	1	0	0
NbS00014360g0010.1 protein AED:0.24 eAED:0.24 QI:0|0.71|0.62|1|0.71|0.75|8|394|325; (*SWP) sp|Q505J9|ATAD1_RAT (e_value=2e-82) ATPase family AAA domain-containing protein 1 OS=Rattus norvegicus GN=Atad1 PE=1 SV=1;; (*TAIR) AT5G53540.1 (e_value=6e-151) | Symbols: | P-loop containing nucleoside triphosphate hydrolases superfamily protein | chr5:21749561-21751099 REVERSE LENGTH=403;; (*ITAG) Solyc08…	MAESGTDAKTKLIVELVLSAATAALGRPLIHTTPYEDMIAGDVVNPDHIDVEFDSIGGLDGIKDTLFQLAILPLRRPELFCHGKLLGPMKGVLLYGPPGTGKTMLAKAIAKESGAVFINLKVSTLMSKWFGDAQKLVAAIFCLAYKLQPPIIVIDEVDSFLGQRRASETEILTSMKTEFMALWDGFTTDQNARVMVLAATNRPTDLDEAILRRFSQSFEIGKPSLSDRIKIFKGERIEDNVDFDRLAGLCEGYTGSNILEACKLAAFIPLREYLHDEKKGKQSQAPRPLSQSDLETALTESKKTKITARKPAVVSFRLDDYEDLD	0	0	2	0	1	0	0	0	0
NbS00046481g0008.1 protein AED:0.10 eAED:0.10 QI:9|1|0.88|1|1|1|9|453|893; (*GB) gi|239819394|gb|ACS28251.1| (e_value=0.0) cell division control protein [Nicotiana glutinosa];; (*SWP) sp|Q96372|CDC48_CAPAN (e_value=0.0) Cell division cycle protein 48 homolog OS=Capsicum annuum GN=CAFP PE=2 SV=1;; (*TAIR) AT3G53230.1 (e_value=0.0) | Symbols: | ATPase, AAA-type, CDC48 protein | chr3:19723416-197264…	MSHQAESSDSKGAKKDFSTAILERKKSPNRLVVDEAVNDDNSVVALNPATMEKLQLFRGDTILIKGKKRKDTVVIALADETCDEPKIRMNKVVRSNLRVRLGDVVSVHQCPDVKYGKRVHILPIDDTIEGLTGDLFDAFLKPYFLEAYRPLRKGDNFLVRGGMRSVEFKVIETDPGEYCVVAPDTEIFCEGEPVKREDEERLDEVGYDDVGGVRKQMAQIRELVELPLRHPQLFKSIGVKPPKGILLYGPPGSGKTLIARAVANETGAFFFCINGPEIMSKLAGESESNLRKAFEEAEKNAPSIIFIDEIDSIAPKREKTHGEVERRIVSQLLTLMDGLKSRAHVIVMGATNETGAFFFCINGPEIMSKLAGESESNLRKAFEEAEKNAPSIIFIDEID…	0	0	2	0	0	0	0	0	0
NbS00000049g0010.1 protein AED:0.11 eAED:0.13 QI:0|1|0|1|1|0.5|2|0|982; (*GB) gi|255558081|ref|XP_002520069.1| (e_value=1e-159) ATP binding protein, putative [Ricinus communis];; (*SWP) sp|Q9LFE4|Y5673_ARATH (e_value=7e-97) WEB family protein At5g16730, chloroplastic OS=Arabidopsis thaliana GN=At5g16730 PE=1 SV=1;; (*TAIR) AT5G16730.1 (e_value=6e-98) | Symbols: | Plant protein of unknown function…	STLSDKSTPATPRDRVSKVSRGLSKSDADSPSPFHNSRPPVEKSPRSVTSKPSVERRSPKISTPPDKKPTRILKPSELQVELNVAHEDLKKAKEKLALVEKEKEKALAEVKESQKMAEEANEKLREAMVAQKRAEENSEIEKFRAVEMEQAGIESAQKKEEEWQKELDAVKNQHALDVAALLSATEELERVKQELTMTSDAKNQALSHADNATKIAEIQAEKVEILSAELARVKSLLESRNENESCETNKLVEDLNLEIAGLREEGSEKNKLLENLKHDIEALRKEDSEKNKLLENLKLEMEALRKEDVEKNKLLENVELEKEALRKGDDEKNILLENLKLASEALRKDDGEKNKLLEKLNLEIEGLRKEDSEKNKLLEDLKLEIETLTEDLEEAKSYE…	0	0	2	0	0	0	0	0	0
NbS00000611g0017.1 protein AED:0.26 eAED:0.29 QI:285|0.84|0.92|1|0.84|0.85|14|338|400; (*GB) gi|356575534|ref|XP_003555895.1| (e_value=4e-155) PREDICTED: putative DNA repair protein RAD23-3-like isoform 1 [Glycine max];; (*SWP) sp|Q84L30|RD23D_ARATH (e_value=3e-134) Putative DNA repair protein RAD23-4 OS=Arabidopsis thaliana GN=RAD23-4 PE=2 SV=2;; (*TAIR) AT5G38470.1 (e_value=3e-135) | Symbols: R…	MKIFVKTLKGSHFEIEVKPEDTVADVKKNIETVQGSDVYPAGQQMLIHQGKVLKDGTTLEENKVAENNFIVIMLTKEVEEKQGEYVRVRRRYSSKSKSSPGEGSATSAAPTAKVPQSSTPTPSSTPAPTAAQVPVASPSPTPAPAPAPAPSAAPASTAVPGSDVYGQAASSLVAGNNLDGAIQQILDMGGGMWDRDTVVRALRAAFNNPERAVEYLYSGIPETAEVPPVGGSPPSAQAGNQPAQPLPAAQPAPVPAGGPNADPLNLFPQGLPSLGSNTGGANTLDFLRNSQQFQALRAMVQANPQILQPMLQELGKQNPQLMRLIQEHQADFLRLINEPVEGGEEGNILGQLAAAMPQAIQVTPEEREAIERLEQMGFDHDLVLEVFFACNKTLRSHARV	0	0	2	0	0	0	0	0	0
NbS00001031g0006.1 protein AED:0.33 eAED:0.33 QI:249|0.5|0.55|1|0.75|0.88|9|0|479; (*GB) gi|225424297|ref|XP_002284658.1| (e_value=1e-149) PREDICTED: uncharacterized protein LOC100264607 isoform 1 [Vitis vinifera];; (*TAIR) AT1G70770.2 (e_value=1e-139) | Symbols: | Protein of unknown function DUF2359, transmembrane | chr1:26688622-26691185 REVERSE LENGTH=610;; (*ITAG) Solyc05g026540.2.1 (e_value=…	MAEKSIAFESNHSGPIDTTHGWQKVTYAKKQKKKQAKPSDTGKVIANGSVVPGADNVFQSLEKHSDERRKRIAEQTAAMYGVDDAPVRLGLKHWSDDENEDSDAEGGRRGAENGAVVEKKKEKVKKPKKPKVTVAEAAMKIDAADLAAFLADVTVSYESQQEIQLMRFADYFGRAFAAVAGSQFPCLKLFRESPISKIADVPLSHLPEPVYKTSVDWINQRSYEALGSFVLWALDSIVVDLETQLGGSKGSKKGGQQTSSKSQPDVLINVLPTLRESPKYQGQDKLSVIAWMIVQGDLCVGLYLWAHHTLPLVGGKSGSNPQTRDLILQLVERILSAPKARTILVNGAVRKGERLIPPSSLDLLLRVTFPAPSARVKATERFEAVYPMLKEVALAGSPG…	0	0	2	0	0	0	0	0	0
NbS00001981g0009.1 protein AED:0.33 eAED:0.33 QI:202|0.83|0.57|1|0.5|0.57|7|0|242; (*GB) gi|359496122|ref|XP_002270110.2| (e_value=4e-79) PREDICTED: nudix hydrolase 2-like [Vitis vinifera];; (*SWP) sp|Q94B74|NUDT2_ARATH (e_value=7e-63) Nudix hydrolase 2 OS=Arabidopsis thaliana GN=NUDT2 PE=1 SV=1;; (*TAIR) AT5G47650.1 (e_value=5e-64) | Symbols: ATNUDT2, ATNUDX2, NUDT2 | nudix hydrolase homolog 2 |…	MEKLVFQNGVKKNQLLSATNDDHGGVIVELKEPMDTTVFQNMLKASLSKWKLQGKKGVWIKVPIELVNLVETAVKEGFWYHHAEPHYLMLVYWIPETENTIPANASHCVGIGAIVLNEKRENTIPANASHRVGIGAIVLNEKRELLVVQENSGRLKGTAVWKIPTGILEEGEDIFEGAIREVKEETGKHGIFKYTKDLCLVKAERNYPGFTPVPITSFFDGSTSFLYVNKDGLDQESSAIHL	0	0	2	0	0	0	0	0	0
NbS00007406g0101.1 protein AED:0.25 eAED:0.25 QI:216|0.8|0.83|1|1|1|6|0|362	MSSDNFTDKNAVFRKLKAKPDNKMCFDCNAKNPTWASVTYGIFLCIDCSATHRSLGVHISFVRSTNLDSWSPEQLKMMYFGGNNRAQVFFKQHGWTDGGKVEAKYTSRAAELYKQLLSKEVAKSKAEDTGLPASPVASQAVQSTNGFSDVKTSEAPKETSSFKEETPASPKASQSVVTTSIRKPIGAKKFGKPGGGLGARKLTKKLSESLYDQKPEEPPVQVSSSNSTSNASTVGSSFASRFEYTDNVQPAEMSSGGPRVLNHVSAPMSSSFFSDYGMDSGFTKKTSSNSSKVQGSSAISSADLFGNDDRADLDLTAGDLINRLSFQAQQDISSLKNIAGETGKKLGSLAATFMSDFQDRIL	0	0	2	0	0	0	0	0	0
NbS00007841g0011.1 protein AED:0.05 eAED:0.05 QI:154|1|1|1|0.83|0.84|13|313|541; (*GB) gi|356498779|ref|XP_003518226.1| (e_value=0.0) PREDICTED: T-complex protein 1 subunit theta-like [Glycine max];; (*SWP) sp|Q552J0|TCPQ_DICDI (e_value=0.0) T-complex protein 1 subunit theta OS=Dictyostelium discoideum GN=cct8 PE=3 SV=1;; (*TAIR) AT3G03960.1 (e_value=0.0) | Symbols: | TCP-1/cpn60 chaperonin famil…	MQPYGIQGMLKEGHKHLSGLDEAVLKNIDACKQLSAITRTSLGPNGMNKMVINHLDKLFVTNDAATIVNELEVQHPAAKILVLAGKAQQEEIGDGANLTVSFAGELLQGAEELIRMGLHPSEIIIGYNKAINKTIELLDELVEKGSENMNVTDKNEVISRMKSAVASKQFGLEDVLCPLVAEACIQVCPKNPANFNVDNVRVAKLLGGGLNNSSIVRGMVLKSDAVGSIKRIEKAKVAVFVQGVDTSATETKGTVLIHSAEQLENYAKTEEAKVEELIKAVADAGAKVIVSGGAVGEMALHFCERYKLMVLKISSKFELRRFCRTTGAVALLKLSQPNADDLGYVDSVSVEEIGGVRVTVVRNEEGGNSVSTVVLRGSTDSILDDLERAVDDGVNTYKA…	0	0	2	0	0	0	0	0	0
NbS00012450g0010.1 protein AED:0.28 eAED:0.28 QI:225|0.90|0.83|0.91|0.63|0.66|12|0|610; (*GB) gi|11558252|emb|CAC17794.1| (e_value=0.0) microtubule-associated protein MAP65-1a [Nicotiana tabacum];; (*SWP) sp|Q9FLP0|MA651_ARATH (e_value=0.0) 65-kDa microtubule-associated protein 1 OS=Arabidopsis thaliana GN=MAP65-1 PE=1 SV=1;; (*TAIR) AT5G55230.1 (e_value=0.0) | Symbols: ATMAP65-1, MAP65-1 | micro…	MAEADAQAPLLDETTCGSLLQKLQQIWDEVGETDDERDNMLLQIDQECLDVYKRKVDQAVKSRAHLLQALADAKVELSRLLSSLGEKTFVGIPEKTSGTIKEQLAAIAPALEKLWEQKDDRIKEFFDVQSQIQKISSEIAGTCEQVESPTVDESDLSLKKLDEFQAQLQELQKEKSERLHKVLELVSTVHDLCAVLGVDFFSTVTEVHPSLNDSTGVQSKSISNDTLSSLAKTVVVLKEDKKQRLHKLQELATQLIDLWNLMDTPEEERSLFDHVTCNISASVDEVAIPGALALDLIEQAEVEVERLDQLKASKMKEIAFKRQAELEDIYARAHVEIDTEAAREKIMALIDSGNVDPAELLADMDNQIVNAKEEAHSRKEILDKVEKWMAACEEESWLD…	0	0	2	0	0	0	0	0	0
NbS00013163g0010.1 protein AED:0.23 eAED:0.23 QI:207|1|1|1|0.77|0.8|10|463|580; (*SWP) sp|Q9FLP0|MA651_ARATH (e_value=0.0) 65-kDa microtubule-associated protein 1 OS=Arabidopsis thaliana GN=MAP65-1 PE=1 SV=1;; (*TAIR) AT5G55230.1 (e_value=0.0) | Symbols: ATMAP65-1, MAP65-1 | microtubule-associated proteins 65-1 | chr5:22402716-22405182 FORWARD LENGTH=587;; (*ITAG) Solyc07g064970.2.1 (e_value=0.0)…	MAEADAQAPVPDETTCGSLLQKLQQIWDEVGETDDERDNMLLQIDQECLDVYKRKVDQAVKSRAHLLQALADAKVELSRLLSSLGEKTYVGIPEKTSGTIKEQLAAIAPALEKLWEQKDDRIKEFFDVQSQIQKISSEIAGTREQVESLTVDESDLSLKKLDEFQAQLQELQKEKRERLHKVLELVSTVHDLCAVLGMDFFSTVTEVHPSLNDSTGVQSKSISNDTLSSLAKTVLVLKEDKKQRLHKLQELATQLIDLWNLMDTPEEERSLFDHVTCNISASVDEVAIPGALALDLIEQAEVEVERLDQLKASKMKEIALKRQAELEDIYARAHVEIDTEAAREKIMALIDSGNVDPAELLADMDNQIVNAKEEAHSRKEILDKVEKWMAACEEESWLD…	0	0	2	0	0	0	0	0	0
NbS00016392g0011.1 protein AED:0.24 eAED:0.24 QI:0|0.92|0.82|1|0.85|0.82|28|769|1269; (*GB) gi|359479902|ref|XP_002267361.2| (e_value=0.0) PREDICTED: uncharacterized protein LOC100260666 [Vitis vinifera];; (*SWP) sp|P28737|MSP1_YEAST (e_value=4e-66) Protein MSP1 OS=Saccharomyces cerevisiae (strain ATCC 204508 / S288c) GN=MSP1 PE=1 SV=2;; (*TAIR) AT4G02480.1 (e_value=0.0) | Symbols: | AAA-type ATP…	MVETRRSSSSSKRSLSSPSSPISNGKRSKAADALSSSTNDTLGEKIQGELNESGPESAELEVRSADLAAAADVPQKSLETEAANEPLVSPMTLGDSVIDVEKSKAKESALNRGKKQQLKSNVGAAASGKLVSQCSQNPHVVMHRATYTVGQGRGSDLWIGDSSVSKTLCNLKHTETEKGVSITLLEVMGKKGDVQVNGKVYPKNSTVPLKGGDEVVFGSSGQHSYIFDDNLSAASFARPVSILEAHSGSFKGLHLEARDPSTVAVASTLASLSNLSKELSLLPPSSQNGKDVKQCSELPILPAASGVAEKDDLDTDMKDASHCNDVPRVLVDEKNDVISPDVGNDNLNLDNTALDSVDAEIGKVRPLLGVHAGSSASEFDLSGRISKILEEPRDFQELF…	0	0	2	0	0	0	0	0	0
NbS00021684g0007.1 protein AED:0.17 eAED:0.19 QI:0|0.33|0.25|1|1|1|4|0|760; (*GB) gi|225456800|ref|XP_002277813.1| (e_value=0.0) PREDICTED: programmed cell death protein 4 [Vitis vinifera];; (*SWP) sp|Q98TX3|PDCD4_CHICK (e_value=9e-35) Programmed cell death protein 4 OS=Gallus gallus GN=PDCD4 PE=2 SV=1;; (*TAIR) AT5G63190.2 (e_value=0.0) | Symbols: | MA3 domain-containing protein | chr5:25346145-…	MASGEGFLTEEQREMLNVAPPNVEVLSSSPKSPTLKSPGTKSSSVLLSEHHVKAPGGEKASTAGIAVRHVRRTHSGKHIRVKKDGAGGKGTWGKLLDTEGESHLDRNDPNYDSGEEPYELVGTAVSDPLDDYKKSVVSIIEEYFSTGDVEQAASRKKQKNNEPYELVSTAVSDPLDDYKKSVVSIIEEYFSTGDVEVAASDLKELGSSEYHPYIIKRLVSMAMDRHDKEKEMASVLLSALYADVINPTQISQGFFMLLESADDLAVDIPDTVDILALFIARAVVDDILPPAFIARARKMLPDSYKGRQVLQTAEKSYLSAPHHAELVERRWGGSTHFTVEGVKKRIADLLREYVESGDTAEACRCIRKLEVSFFYHEVVKRALVLAMEMQSAEPLILKL…	0	0	2	0	0	0	0	0	0
NbS00022976g0010.1 protein AED:0.02 eAED:0.02 QI:0|1|0.77|1|0.87|0.88|9|0|1296; (*GB) gi|225462062|ref|XP_002269575.1| (e_value=0.0) PREDICTED: enhancer of mRNA-decapping protein 4-like [Vitis vinifera];; (*TAIR) AT3G13300.1 (e_value=0.0) | Symbols: VCS | Transducin/WD40 repeat-like superfamily protein | chr3:4304085-4309949 FORWARD LENGTH=1344;; (*ITAG) Solyc10g005920.2.1 (e_value=0.0) genomic_r…	IIPPISSHLFITFSHSNPLLNLALNPISVSSNPTLKSSIFKSLTFFIQLRIIYLQFFHSYSDPYIIQYTIMSSAGNPNQPGGVPFDMHKFFNPSTPPPPTSTNPNPQNPINPTLISSPFPLPSASYPPPTAGGGGGGSGGLYYPPHTTTPFHHIPQFNPHIPTQYAPQQQDGHLHPQRSMSFPTPPLQPPTPTSPHQFLNPNPNPNHGARLMALLSAPPSSTLEVSSQQPTTLQIIPPLQPTTSGSELSDFSASPNVGPGPVRMQSTKLPKGRHLNGENVVYDIDARLPGEVQPQLEVTPITKYGSDPGLVLGRQIAVNKSYICYGLKLGAIRVLNINTALRSLLKGLAQRVTDMAFFAEDVHLLASASVDGRVYIWKITEGPDEEDKPQITGKIVIAI…	0	0	2	0	0	0	0	0	0
NbS00023129g0120.1 protein AED:0.10 eAED:0.13 QI:0|0|0|0.66|1|1|3|0|861	MGKSGGRKKKGGVSQNQNQNQNQNQGAVGESHKPVVVNGSVDLDSSIFLKRAHELKEEGNRRFQAKDYVGALQQYESALKLTPKTHPERAVFHSNRAACLMQMKPIDYDSVISECTMALQVQPRYVRALLRRARAFEAVGKYEMAMQDVQILLGADPNHRDALEITGRLRMALGPRPEAQQDLQSRPSPAALGASAVGAAPIAGLGPCLPARPMSKKPAPSTGASAISVNNKPEKPYQVTLAENGTQPKVQLPKVVLKPSNGPSKPRPDHNKDDQREQASLSVSNVVSGHSKDVAIRWRPLKLVYDHDIRLAEMPVNCSFRVLRDIVSKRFPMSKSVLVKYKDSDGDLVTITCTSELRSAESWVDGLLPKDPDADKTDSIGMLRLHVVEVSPEQEPALL…	0	0	2	0	0	0	0	0	0
NbS00024250g0002.1 protein AED:0.01 eAED:0.01 QI:0|-1|0|1|-1|1|1|0|1475; (*GB) gi|225437318|ref|XP_002267274.1| (e_value=0.0) PREDICTED: translocase of chloroplast 159, chloroplastic-like [Vitis vinifera];; (*SWP) sp|O81283|TC159_ARATH (e_value=0.0) Translocase of chloroplast 159, chloroplastic OS=Arabidopsis thaliana GN=TOC159 PE=1 SV=1;; (*TAIR) AT4G02510.1 (e_value=0.0) | Symbols: TOC159, TOC8…	MPNNVANTDTEINNNNNSYNSNGVSDDGTLVSGGQREKLVTGSEKPLLVDPDEKAVEKSIGEEQSNDSAEISMLKSVKPVSEVSMVDGVEKVEVLGGEKCEGVTLSEDSGGVGGFVSEGNTEELNSVDESNSIEQVKESGGEIAVGTELKKGVDGSTQEEVKEILENEKDEALTSVASSNLKGAVEPDKTVVEESATHSDDAEKHNKAVIEPSESFLVEADREKFTLEGDAVVDAIDVNVNASAPGVAVIGDVEESAIPSDVAKKPNEQVVERSLLVGAEGEKFTPEGDAVVDAIDFNFNVSAPGVAVVGDVEESEVNVSAPGVAVVGDVEGSVVNVSAPGVAVVGDVEESEEVEQHVESPADVSESLLIEADGEKFTSVGDAVVDAIDVNVSGTGLAV…	0	0	2	0	0	0	0	0	0
NbS00029360g0016.1 protein AED:0.14 eAED:0.14 QI:0|0.87|0.77|1|0.87|0.77|9|0|449; (*GB) gi|359480318|ref|XP_002272650.2| (e_value=3e-90) PREDICTED: uncharacterized protein LOC100249710 [Vitis vinifera];; (*TAIR) AT5G43960.1 (e_value=7e-79) | Symbols: | Nuclear transport factor 2 (NTF2) family protein with RNA binding (RRM-RBD-RNP motifs) domain | chr5:17689154-17691653 REVERSE LENGTH=450;; (*ITAG…	MASSYSAPIGATQVGSYFVQQYYQVLQQQPDYVHQFYTDASSIVRVDGDSSESASALVQIHTLIMSMSFSGIKIKTINSLESWNGGVLVVVSGSVKLKDLSRWRNFVQTFLLAPQEKGYFVLNDVFHFVNDEGCELPQAPVGLQNNLDAQPTASYPLAEPPAHDYALEVEATEYVNSVHIQGNDGVEEYSYPEHDHEHLSEAEGEAEPEAESEAEVEVPEEAHLGEETVQVRSLEEETALPNNVVKVVPEPEPAAEEPVGEPSKFSYAAILRAPKGKPAPSIRIQPSYTKTAPSVSEWQPPVEQSRSMAPVVPNASLDLAEEGSSQEGESKSVYVRNLPSTVSSLDILQEFKNFGKIKQDGVFLRNHTDVGVCYAFVEFEEVQGVQNAIKASPIQLAGR…	0	0	2	0	0	0	0	0	0
NbS00029684g0021.1 protein AED:0.23 eAED:0.23 QI:236|0.90|0.91|1|0.90|0.83|12|232|530; (*GB) gi|147770771|emb|CAN60953.1| (e_value=0.0) hypothetical protein VITISV_008875 [Vitis vinifera];; (*SWP) sp|Q93Y22|COPD_ARATH (e_value=0.0) Coatomer subunit delta OS=Arabidopsis thaliana GN=At5g05010 PE=1 SV=2;; (*TAIR) AT5G05010.2 (e_value=0.0) | Symbols: | clathrin adaptor complexes medium subunit family…	MVVLAASIISKSGKALVSRQFVDMSRIRIEGYLAAFPKLVGTGKQHTYIETDNVRYVYQPIESLYLLLVTNKQSNILEDLETLRLLSKLVPEYCHSLDEEGIGSTSFELIFAFDEVISLGHKENVTVTQVKQYCEMESHEERLHKLVLQNKINETKDVMKRKASEIGKSKIEKNRGEKGGFMSLQSMGSGRIDTGFGSDSGISSGGTGGFGSGSGFGLSPDVDTFSTKSKGRPAASATAPPKGLGMQLGKNQKTNQFLESLKAEGEVIVEDVRPSIGQAKPAAAPLTDPVTLTVEEKINVTLKRDGGVSNFDVQGTLSLQILNQEDAFIQVQIETSGNPTILFKTHPNMNKELFSNENILGLKDPNRPFPTGQGGDGVSLLRWRMQTADESILPLTINC…	0	0	2	0	0	0	0	0	0
NbS00032031g0015.1 protein AED:0.26 eAED:0.26 QI:0|0.83|0.84|1|0.77|0.78|19|368|663; (*GB) gi|225424719|ref|XP_002265302.1| (e_value=0.0) PREDICTED: threonyl-tRNA synthetase, mitochondrial [Vitis vinifera];; (*SWP) sp|O04630|SYTM_ARATH (e_value=0.0) Threonine--tRNA ligase, mitochondrial OS=Arabidopsis thaliana GN=THRRS PE=2 SV=3;; (*TAIR) AT5G26830.1 (e_value=0.0) | Symbols: | Threonyl-tRNA synth…	NHIPYPNSIRPIACPPRYSQLILTQSFSKTEAITPNTPVTLCYWLPHSIAASSSNLSAAVLRRVNSFSSSVVSHQNHQWEKLRKVPKLIPAPSPTLKTKVIYKTLFLNVSLSSSLFRMSNTFRAFRSPLILSSERGALGFVEAIGRPLEGDCKLELFTFDSDEGRDTFWHSSAHILGESLERTYGCKLCIGPCTTRGEGFYYDAFYGELGLNEDHFKRIESEAAKAVSEKQPFERIEVSRQQALDMFSDNRFKVEIIKDLPEDKTITVYRCGPLVDLCRGPHIPNTSFVKALACTKASSAYWRGDKDRESLQRVYGISYPDKKQLKEHLAMLEEAKKYDHRELTKKQELFFFHPLSPGSCFFLPHGARVCNKLLEFIKSQYWKRGYEEVWSPNMYNMQL…	0	0	2	0	0	0	0	0	0
NbS00032591g0119.1 protein AED:0.13 eAED:0.13 QI:0|0.87|0.66|0.88|1|1|9|0|991	MIVRVGLVVAASIAAYAVKQINVKPSKPSENGEPFPKQRSDEGNEKEQLLYSTDGPKEVVDEEEEKEEVKLMNGIINPAQDNQLDLDDDLFPEFEDLLSGEIEFPLPSDKYDTEREEREKVYQNEMANNEKELERLRNLVKELEEREVKLEGELLEYYGLKEQESDILELQKQLKIKSVEIDMLNITINTLQAEKQKLQEEVFNGTTARKELEAARSKIKELQRQMLLEANQTKAQLLLLKQHVSGLQEKEEDAFKRDVEVDKKLRLVKELEVEVMELKRKNKELQHEKRELVIKLDAAESKVANLSNMTENEMVAQVREEVTNLKHTNEDLLKQVEGLQMNRFSEVEELVYLRWVNACLRFELRNYQTPQGKVSARDLSKNLSPRSQQKAKQLMLEYA…	0	0	2	0	0	0	0	0	0
NbS00035685g0001.1 protein AED:0.26 eAED:0.33 QI:0|0|0|1|1|1|2|0|167; (*ITAG) Solyc04g005480.1.1 (e_value=4e-29) evidence_code:10F1H0E1IEG genomic_reference:SL2.40ch04 gene_region:323321-323833 transcript_region:SL2.40ch04:323321..323833- functional_description:"Unknown Protein (AHRD V1)";	MDPTQSKTTSGASHSSSHKPNSHPKPSKSELMSSAKLVADAAKAKLHHEPNSKVDKSELAGAAADLLNAASQYGKLEEKGIGKFVGKAETYLHKYETSHSTTTTGTTTTTSATEHTQSSAHTGGNLEQSGSGYGEYIKMAEGIFKKHSDGTHSSESGGGCIADGVRQ	0	0	2	0	0	0	0	0	0
NbS00037393g0011.1 protein AED:0.30 eAED:0.30 QI:30|0.87|0.66|1|0.75|0.77|9|222|270; (*GB) gi|296089916|emb|CBI39735.3| (e_value=8e-155) unnamed protein product [Vitis vinifera];; (*SWP) sp|O04630|SYTM_ARATH (e_value=2e-143) Threonine--tRNA ligase, mitochondrial OS=Arabidopsis thaliana GN=THRRS PE=2 SV=3;; (*TAIR) AT5G26830.1 (e_value=2e-144) | Symbols: | Threonyl-tRNA synthetase | chr5:9437351-9…	MNCPGHCLIFDHRVRSYRELPLRLADFGVLHRNEASGALTGLTRVRRFQQDDAHIFCRESQIKDEVKGVLDFISYVYKIFGFTFELKLSTRPEKYLGDLESWNKAEDALAEALDEFGKPWEKNEGDGAFYGPKIDISVSDAMRRKFQCATLQLDFQLPQRFNLAYSAEDENKRERPVMIHRAILGSVERMFAILLEHFKGKWPFWLSPRQAMVCPVSDKSQSYALELRERIHDAGYYVDVSVRVRDKPDHQVMTVDDLLAHFKDMVASFQ	0	0	2	0	0	0	0	0	0
NbS00051652g0005.1 protein AED:0.15 eAED:0.15 QI:0|1|0.84|1|0.83|0.92|13|0|987; (*GB) gi|359491847|ref|XP_002272793.2| (e_value=0.0) PREDICTED: uncharacterized protein LOC100240982 [Vitis vinifera];; (*SWP) sp|Q9HGL2|YHLA_SCHPO (e_value=1e-14) Uncharacterized calcium-binding protein C800.10c OS=Schizosaccharomyces pombe (strain 972 / ATCC 24843) GN=SPBC800.10c PE=2 SV=1;; (*TAIR) AT1G20760.1 (e_v…	MDQFEAYFRRADLDQDGRISGAEAVAFLKGSNLPQPVLAQIWTHADQSRTGFLSRPEFYNALKLVTVAQSKRDLTPDIVKAALYGPASAKIPAPQINLAAIASPQLNSVGAAPAQQMGVGVPTTSQNHGIRGQLPPTTGMNQQYLTSQANHSVRPPVPIAATASRPQQSLAGMDFPRGGSLTGPGLPNSNISNDYLGSRQAAISAGPTMQPPNRGMSPLVPPVTQTLQGSLSLPSMTAANTKATGSSGNGFASDTMFGGEAFSASQSVPKKSSSTPNLNFSVNSAPTSSAMVPVTTESQTSSKPDPFAAFNTITRQSPANQQQVTPSVSKPNQQVSGQNSLPVSSSGTPAGSVNPAPEQSQVPWPKMTRAGVQKYAKVFMEVDSDRDGKISGQQARDLF…	0	0	2	0	0	0	0	0	0
NbS00053961g0017.1 protein AED:0.15 eAED:0.15 QI:0|0.76|0.70|1|0.80|0.74|27|2928|1578; (*GB) gi|899344|emb|CAA58859.1| (e_value=0.0) lipoxygenase [Nicotiana tabacum];; (*SWP) sp|Q43191|LOX15_SOLTU (e_value=0.0) Probable linoleate 9S-lipoxygenase 5 OS=Solanum tuberosum GN=LOX1.5 PE=2 SV=1;; (*TAIR) AT1G55020.1 (e_value=0.0) | Symbols: LOX1, ATLOX1 | lipoxygenase 1 | chr1:20525798-20530143 FORWARD …	MFLEKIVDAISGKDDGKKVKGTVVLMKKNVLDFTDINASVLDGVLEFLGRRVSLELISSVHVDPGNEFFLKSLTLEDVPNHGKVHFVCNSWVYPANKYKSPRIFFANQAYLPSETPEPLRKCRENELVTLRGDGTGKLEEWDRVYDYAYYNDLGDPDKGKELSRPVLGGSSEYPYPRRGRTGREPTKSDPNSESRIPLLMSLDIYVPRDERFGHIKLSDFLTFALKSIVQLLLPEFQALFDSTPNEFDSFEDVLKLYEGGIKLPQGPLLKAITDNIPLEILKELLRSDGEGLFKYPTPQVIQEDKTAWRTDEEFGREMLAGVNPVVISRLQEFPPKSKLDPKTYGNQNSTITREQIEDKLDGLTIDEAIKTNKLFILNHHDILMPYLRRINTSTDTKTY…	0	0	2	0	0	0	0	0	1
NbS00015249g0017.1 protein AED:0.18 eAED:0.18 QI:0|0.5|0.66|0.66|1|1|3|0|395; (*GB) gi|225461774|ref|XP_002285602.1| (e_value=0.0) PREDICTED: TOM1-like protein 2 [Vitis vinifera];; (*SWP) sp|Q5SRX1|TM1L2_MOUSE (e_value=7e-23) TOM1-like protein 2 OS=Mus musculus GN=Tom1l2 PE=1 SV=1;; (*TAIR) AT5G16880.2 (e_value=0.0) | Symbols: | Target of Myb protein 1 | chr5:5549658-5551274 FORWARD LENGTH=407;; …	MSDNNLLDKVGAFGERLKIGGTEVGQKITAGMSSMSFKMKELFQGPNQADKLVEEATAETMDEPDWAMNLELCDMINHDRINSVELIRGVKKRMMLKNPRIQYLGLVLLETIAKNCEKAFSEIAAERILDEMVKLIDDPQTVVNNRNKALVLIEAWGESSSELRYLPVYEETYKSLRSRGVRFPGRDHESLAPIFTPPRTVSASEPDVTLAQQIQHEIPRENFSAEQTKEAFDVARNSVELLTTVLSSSPQQDALQDDLTATLVQQCRQSLNTVQRIIETAGDNEALLFEALNINDEVQKALSKYDELKKPMAVSSEPEPAMIPVAVEPDESPRAGKEDALIRKPAGSRSAVHGGNDDMMDDLDEMIFGKKAGGTSESGHDTKKQQSPKDDLISF	0	0	2	1	0	0	0	0	0
NbS00001563g0014.1 protein AED:0.26 eAED:0.26 QI:0|0.91|0.76|0.92|0.91|0.92|13|0|423; (*GB) gi|359487776|ref|XP_002284915.2| (e_value=0.0) PREDICTED: branched-chain-amino-acid aminotransferase-like protein 2 [Vitis vinifera];; (*SWP) sp|Q9ASR4|BCAL2_ARATH (e_value=0.0) Branched-chain-amino-acid aminotransferase-like protein 2 OS=Arabidopsis thaliana GN=At5g27410 PE=2 SV=1;; (*TAIR) AT5G27410.2 (e…	MGEETEVIHSWSAPRSLSTSLMYSFAQSFLVLQRNDIEVLDEPLYAHFLRVTGADRPYREELRSKMENDGNKVVKEAIFGAGTKKYRYCKHIAKQRVPGLTNELMKRGKHFILIRNPLDILPSFDKVVPPSFLELGLAELVSIYSELSELGKPPPVIDAADIQENPEAALRGLCEDLDIPFQDSMLRWEAGPKSFDGIWAPWWYKSVHKSTGFAPAKKYPMPFPTSLYDLLEQSLPFYNMLKRHARRSSYILNSTLPHPSLPVPANEKLLAWVGDEIVPRETAKVSVFDSVVQGGDAVWEGLRVYSGKLFKLEEHLDRLFDSAKALAFSNVPTREEVKEAIFKTLLTNGMYDNAHIRLTLTRGKKVTSGMSPAFNQYGCTLIVLAEWKPPVYDNEKGII…	0	0	2	1	0	0	0	0	0
NbS00010935g0008.1 protein AED:0.06 eAED:0.06 QI:12|0.66|0|1|0.66|0.5|4|0|367; (*GB) gi|77416931|gb|ABA81861.1| (e_value=0.0) UDP-glucose:protein transglucosylase-like [Solanum tuberosum];; (*SWP) sp|Q8RU27|UPTG2_SOLTU (e_value=0.0) Alpha-1,4-glucan-protein synthase [UDP-forming] 2 OS=Solanum tuberosum GN=UPTG2 PE=1 SV=1;; (*TAIR) AT3G08900.1 (e_value=0.0) | Symbols: RGP3, RGP | reversibly glycos…	MAGESMAPTPLLKDELDIVIPTIRNLDFLEMWRPFFQPYHLIIVQDGDPSKIIKVPEGFDYELYNRNDINRILGPKASCISFKDSACRCFGYMVSKKKYIYTIDDDCFVAKDPSGKDINALEQHIKNLLCPSTPHFFNTLYDPYREGADFVRGYPFSMREGAPTAVSHGLWLNIPDYDAPTQLLLSINTHIITFSRYVDAVMTIPKGTLFPMCGMNLAFNRELIGPAMYFGLMGDGQPIGRYDDMWAGWCTKVICDHLGMGIKTGLPYIWHSKASNPFVNLKKEYKGIYWQEEIIPFFQSATLPKDCTSVQQCYIELSKQVKDKLSKVDPYFTKLADAMVTWIEAWDELNPTGEGLAKLSISNVPVK	0	0	2	1	0	0	0	0	0
NbS00012513g0007.1 protein AED:0.22 eAED:0.22 QI:0|0.89|0.85|0.95|0.89|0.8|20|421|824; (*GB) gi|225435331|ref|XP_002285194.1| (e_value=0.0) PREDICTED: serine/threonine-protein phosphatase 6 regulatory subunit 3-like [Vitis vinifera];; (*SWP) sp|Q5H9R7|PP6R3_HUMAN (e_value=1e-59) Serine/threonine-protein phosphatase 6 regulatory subunit 3 OS=Homo sapiens GN=PPP6R3 PE=1 SV=2;; (*TAIR) AT1G07990.1 (…	MKIYAIYMVEAVLDKENFTLEELLDEEEIIQECKALNSRLINFLRERTQVEQLLHYIVEEPSEVADSKRTFKFPFIACEIFTCEIDVILKTLVDDEELMNLLFSFLEPSRPHGALLAGYFSKVVICLTVRKTVPLMNYVQAHHDVFQQMVDLIGITSIMEVLVRLVGADDHMYPNTMDVMQWLADSSLLEMIVDKLNPSSSPEVHANAAEALCAITRNTPSPMATKLSSPSFVARIFGHALEDSHLKSSLVHSLSVCISLLDPKRSIPSTMMYSFRNQHVYESPVHANPDTIDAMLPKLSGLLELLNVSSDEKILPTTYGELRPPLGKHRLKIVEFISVLLKTGNEVAEKELISSGTIERVLNLFFEYPYNNALHHHVESIISSCLESKNIAIVDHLFE…	0	0	2	1	0	0	0	0	0
NbS00015863g0003.1 protein AED:0.24 eAED:0.25 QI:7|0.92|0.86|1|0.85|0.89|29|1345|990; (*TAIR) AT1G02890.2 (e_value=3e-164) | Symbols: | AAA-type ATPase family protein | chr1:645372-651797 REVERSE LENGTH=1218;; (*ITAG) Solyc03g110900.2.1 (e_value=0.0) genomic_reference:SL2.40ch03 gene_region:55671361-55690483 transcript_region:SL2.40ch03:55671361..55690483- go_terms:GO:0005524,GO:0017111 functiona…	MVATRRSGSLPSTVKRSSSSSSDSSSKRLKVDNNNAESSEKPKSSVPPATENPKELGSTDPPESGAVTPQATSGDGETAAKIDDAPAISVVAPITEGNSLLTSLFRNLLFFYYLFTLNLDRIQSVCKLVAFSFSGVLGATPAIVDKPRSSMSLRKQNQGSETTSPWCWLMSEYPQNPTIHVSATNFLVGSSKTAHLHIKHQTVSATLCSLRLTQHEGNWVAVLESRGKGSVQVNGKTIKKNTSCILNSGDGLAFGLVGNHAYIFQQLPYELGVKSPPSDVRTSAGKLLRVEKRAGDASAVAGASILASLSSLRQDPSRLKPTSQVSGNELPSSPVIHEDELDGLEVDSAANVSSSSAADVGLTSKILPLDGDLNSGREAGNVKYTGGKRLDQRCNASFC…	0	0	4	1	0	0	0	0	0
NbS00010608g0002.1 protein AED:0.28 eAED:0.28 QI:0|-1|0|1|-1|1|1|0|212; (*GB) gi|121631|sp|P27484.1|GRP2_NICSY (e_value=2e-46) RecName: Full=Glycine-rich protein 2;; (*SWP) sp|P27484|GRP2_NICSY (e_value=7e-48) Glycine-rich protein 2 OS=Nicotiana sylvestris GN=GRP-2 PE=2 SV=1;; (*TAIR) AT2G21060.1 (e_value=9e-32) | Symbols: ATGRP2B, ATCSP4, GRP2B | glycine-rich protein 2B | chr2:9036983-9037588 RE…	MAEESGQRAKGTVKWFSDQKGFGFITPDDGGEDLFVHQSGIRSEGFRSLAEGETVEFEVESGGDGRTKAVDVTGPDGAAVQGGRGGGGGGGRSGGGYGGGGGGYGGGGRGGSRGYGGGDGGYGGGGGYGGGSRYGGGGGGYGGGGGYGGGGSGGGNGCFKCGESGHFARDCTQSGGGGGGGRFGGGGGGGGGGCYKCGEDGHFARECTSGGR	0	1	2	0	1	0	0	1	0
NbS00030487g0018.1 protein AED:0.08 eAED:0.11 QI:0|1|0.5|1|1|1|2|0|876; (*GB) gi|388540218|gb|AFK64817.1| (e_value=0.0) translation elongation factor 2 [Prunus persica];; (*SWP) sp|O23755|EF2_BETVU (e_value=0.0) Elongation factor 2 OS=Beta vulgaris PE=2 SV=1;; (*TAIR) AT1G56070.1 (e_value=0.0) | Symbols: LOS1 | Ribosomal protein S5/Elongation factor G/III/V family protein | chr1:20968245-20971077…	MVKFTAEELRHIMDYKHNIRNMSVIAHVDHGKSTLTDSLVAAAGIIAQEVAGDVRMTDTRADEAERGITIKSTGISLYYQMTDESLKNFKGERNGNEYLINLIKSTGISLYYQMTDDSLKNFKGERNGNEYLINLIDSPGHVDFSSEVTAALRITDGALVVVDCVEGVCVQTETVLRQALGERIRPVLTVNKMDRCFLELQVDGEEAYQTFSRVIENANVIMATYEDPLLGDVQVYPEKGTVAFSAGLHGWAFTLTNFANMYASKFGVDESKMMERLWGENFFDPATKKWTTKSTGSATCKRGFVQFCYEPIKQIINTCMNDQKDKLWPMLQKLGVTMKSEEKELMGKALMKRVMQTWLPASTALLEMMIFHLPSPSTAQKYRVENLYEGPLDDQYANA…	0	0	3	0	1	0	1	0	0
NbS00025982g0019.1 protein AED:0.06 eAED:0.06 QI:193|0.90|0.91|1|1|1|12|262|450; (*GB) gi|225435307|ref|XP_002285127.1| (e_value=0.0) PREDICTED: ruvB-like 1-like [Vitis vinifera];; (*SWP) sp|Q9DE26|RUVB1_XENLA (e_value=0.0) RuvB-like 1 OS=Xenopus laevis GN=ruvbl1 PE=2 SV=1;; (*TAIR) AT5G22330.1 (e_value=0.0) | Symbols: ATTIP49A, RIN1 | P-loop containing nucleoside triphosphate hydrolases superfam…	MKIEEVQSTTKKQRIATHTHIKGLGLEPDGTPIPLAAGFVGQAAAREAAGLVVDMIRQKKMAGRALLLAGPPGTGKTALALGISQELGSKVPFCPMVGSEVYSSEVKKTEVLMENFRRAIGLRIKENKEVTELSPEESESVTGGYGKSISHVIIGLKTVKGTKQLKLDPTIYDALIKEKVAVGDVIYIESNSGAVKRVGRSDAFATEFDLEAEEYVPLPKGEVHKKKEIVQDVTLHDLDAANARPQGGQDILSLMGQMMKPRKTEITDKLRQEINKVVNRYVDEGVAELVPGVLFIDEVHMLDMECFSYLNRALESSLSPIVIFATNRGICTVRGTDMTSPHGIPVDLLDRLVIVRTETYGPAEMIQILAIRAQVEELEIDEESLAYLGEIGQQASLRH…	0	0	2	0	0	0	0	0	0
NbS00037721g0005.1 protein AED:0.23 eAED:0.23 QI:83|1|0.75|1|0|0.25|4|0|517; (*GB) gi|225458045|ref|XP_002277913.1| (e_value=5e-127) PREDICTED: zinc finger CCCH domain-containing protein 6-like [Vitis vinifera];; (*SWP) sp|Q56XU4|C3H6_ARATH (e_value=3e-81) Zinc finger CCCH domain-containing protein 6 OS=Arabidopsis thaliana GN=At1g19860 PE=2 SV=1;; (*TAIR) AT1G19860.1 (e_value=2e-82) | Symbols: |…	MRGQQKSKRVTWASDVNLCQVRLFLSEESPAQVGLGTQDHLQAKISCPLHAGILVSDDNLPPGFESAQPASLWKNKLAQIPVIKWTRPPSFVLDIKWRLVAGEESNEMEVQKQREMRVLEAIYPRESSIPPNPSMVPGEETLHNEQNTPVIPMTPVEEEEVADPSFGTVLPSNAVSSKAQVMQSGVPLSNKSAGNNLPPPGISSAGVVPDAEPDVVAAAQAALTALMADNGQGNLIDHELLIKILSDQKIVGQLVTQQGVGTSSHSMPPTSTQNMSAASNMPNPRPQASSNTATPQAVVSRADPSFINTGRTDPPTGQVSRTELVMPSVAGASNGPFHSAPSKIGPISSLRPRVPEVVSAPLPSVGAPVATVSTPSSSMPAPVVRDINYYKSLIQQHGG…	0	0	1	2	0	0	0	0	0
NbS00048536g0001.1 protein AED:0.07 eAED:0.07 QI:0|0.5|0|0.66|1|1|3|0|358; (*GB) gi|83283995|gb|ABC01905.1| (e_value=0.0) fructose-bisphosphate aldolase-like protein [Solanum tuberosum];; (*SWP) sp|P17784|ALF_ORYSJ (e_value=0.0) Fructose-bisphosphate aldolase cytoplasmic isozyme OS=Oryza sativa subsp. japonica GN=FBA PE=1 SV=2;; (*TAIR) AT2G36460.1 (e_value=0.0) | Symbols: | Aldolase superfamily …	MSCYKGKYADELIANAKYIGTPGKGILAADESTGTIGKRFSSINVENVESNRRALRELLFTTPGAVQYLSGVILFEETLYQKTASGKPFVDVLKEGGVLPGIKVDKGTVELPGTNGETTTQGLDGLAERCQKYYEAGARFAKWRAVLKIGANEPSQLAINENANGLARYAIICQQNGLVPIVEPEILVDGSHDINKCADVTERVLAACYKALNDHHVLLEGTLLKPNMVTPGSEAAKVAPEVIAEYTIRALQRTMPAAVPAVVFLSGGQSEEEATVNLNAMNKLQTKKPWSLSFSFGRALQQSTLKAWAGKEENVQKAQAAFLTRCKANSEATLGKYAGATNLSDGASESLHVKDYKY	0	0	0	2	0	0	0	0	0
NbS00022644g0010.1 protein AED:0.18 eAED:0.20 QI:0|0.63|0.58|0.91|0.90|0.83|12|0|550; (*GB) gi|224117802|ref|XP_002331635.1| (e_value=0.0) methylenetetrahydrofolate reductase [Populus trichocarpa];; (*SWP) sp|Q75HE6|MTHR_ORYSJ (e_value=0.0) Probable methylenetetrahydrofolate reductase OS=Oryza sativa subsp. japonica GN=Os03g0815200 PE=2 SV=1;; (*TAIR) AT3G59970.3 (e_value=0.0) | Symbols: MTHFR1 |…	MKVIDKIHESAKTDRVVFSFEFFPPKTEDGVDNLFERMERMNMVCVETMMHLTCTNMPVEKIDHALETVKSNGIQNVLALRGDPPHGQDKFVQVEEAHPDVIPANGIATQETYENDLAYLKKKVDAGADLIVTQLFYDTDIFLKFVNDCRQIGITCPIVPGIMPINNYKGFLRMTGFCKTKIPAEITAALEPIKDNEEAVKAYGIHQATEMCKKILATGIKTLHLYTLNMEKSALAILMNLGLIEESKISRPLPWRRPTNVFRVKEDVRPIFWANRPKSYISRTIGWDEYPHGRWGNAQNPSYGALSDYQFMRARSRDKKLQEEWAVALNSVEDIYERFMNYCLGKLRSCPWSELDGLQPETKIIDEHLGNINTKGFLTINSQPAVNGAKSDAPSIGWG…	0	0	0	2	0	0	0	0	0
NbS00013725g0001.1 protein AED:0.11 eAED:0.11 QI:0|1|1|1|1|1|6|492|376; (*GB) gi|350538241|ref|NP_001234589.1| (e_value=0.0) GDP-mannose 3',5'-epimerase [Solanum lycopersicum];; (*SWP) sp|A3C4S4|GME1_ORYSJ (e_value=0.0) GDP-mannose 3,5-epimerase 1 OS=Oryza sativa subsp. japonica GN=GME-1 PE=1 SV=1;; (*TAIR) AT5G28840.2 (e_value=0.0) | Symbols: GME | GDP-D-mannose 3',5'-epimerase | chr5:10862472-1…	MGSSGGTSYGEYTYENLEREPYWPSEKLRISITGAGGFIASHIARRLKTEGHYIIASDWKKNEHMSEDMFCHEFHLVDLRVMDNCLKVTKGVDHVFNLAADMGGMGFIQSNHSVIMYNNTMISFNMMEASRITGVKRFFYASSACIYPEFKQLETNVSLKESDAWPAEPQDAYGLEKLATEELCKHYNKDFGIECRIGRFHNIYGPFGTWKGGREKAPAAFCRKAQTSTDKFEMWGDGKQTRSFTFIDECVEGVLRLTKSDFREPVNIGSDEMVSMNEMAEMVLSFEDKKLPIHHIPGPEGVRGRNSDNTLIKEKLGWAPSMKLKDGLRITYFWIKEQIEKEKVQGADVSVYGSSKVVGTQAPVQLGSLRAADGKE	0	0	0	2	0	0	0	0	0
NbS00000177g0011.1 protein AED:0.09 eAED:0.09 QI:137|1|1|1|1|1|7|356|261; (*GB) gi|122196609|sp|Q285L8.1|RS3A_TOBAC (e_value=7e-179) RecName: Full=40S ribosomal protein S3a; AltName: Full=Protein cyc07;; (*SWP) sp|Q285L8|RS3A_TOBAC (e_value=2e-180) 40S ribosomal protein S3a OS=Nicotiana tabacum GN=cyc07 PE=2 SV=1;; (*TAIR) AT4G34670.1 (e_value=2e-152) | Symbols: | Ribosomal protein S3Ae | chr4:16…	MAVGKNKRISKGKKGGKKKATDPYAKKDWYDIKAPSVFDIKNVGKTLVTRTQGTKIASEGLKHRVFEVSLADLQKDEDQSFRKIRLRAEDVQGKNVLTNFWGMDFTTDKLRSLVKKWQTLIEAHVDVKTTDSYTLRMFCIAFTKKRPNQQKRTCYAQSSQIRQIRRKMVEIMRNQASSCDLKELVAKFIPESIGREIEKATSSIFPLQNVYIRKVKILKAPKFDIGKLMEVHGDYSEDVGVKLDRPADENVAEAEPEIPGA	0	0	0	2	0	0	1	0	0
NbS00022646g0011.1 protein AED:0.16 eAED:0.16 QI:0|0.77|0.6|1|0.77|0.7|10|356|537; (*GB) gi|225428661|ref|XP_002284886.1| (e_value=0.0) PREDICTED: uncharacterized protein LOC100262433 [Vitis vinifera];; (*TAIR) AT2G15860.1 (e_value=3e-152) | Symbols: | unknown protein; FUNCTIONS IN: molecular_function unknown; INVOLVED IN: biological_process unknown; LOCATED IN: cellular_component unknown; EXPRES…	MAENTTKPSNEEIVEKQEGAKQPPPQGGGGGWGGWGFSAFSYISDIQKAATTAAEEISRNAVEAAKIAAKSLADVQDASEDSESSKEDEREVLIEEESEDETDKKRKAALEKLEKAIENFASGAWQALGNAFKGGSDLVHKLEESALSIAESVQHGGLPSTTGSAEPSILETGKAFTAKGMHALELLGKETMDLLISETGIGVDPNTKEGGGKTDEDQFYEEVAFDRCFYIYGGPEQLEELEALSNHYALLFNRRKAKLPSDQWSSYDGKLKEVEQIFDLSSEVYGSSTESGKGKKVESCIADSTDEVKNLHDSSVMIFDLSSEVYGSSTESGKGKKVETGIADSTDEVKNLHDSSVNKAAELAAGFTNVLVGLASDDMIQRTARRLDTLHSEGVHRLS…	0	0	0	2	0	0	0	0	0
NbS00030061g0008.1 protein AED:0.22 eAED:0.22 QI:14|1|1|1|0|0.5|2|513|372; (*GB) gi|255581972|ref|XP_002531784.1| (e_value=4e-93) transferase, putative [Ricinus communis];; (*TAIR) AT5G02890.1 (e_value=9e-57) | Symbols: | HXXXD-type acyl-transferase family protein | chr5:670207-671454 REVERSE LENGTH=353;; (*ITAG) Solyc08g007210.2.1 (e_value=8e-171) genomic_reference:SL2.40ch08 gene_region:1775628…	MATCNGNGAAKFSSKLQVEAIQTVIPMKITDPRLSRRIVVSKIFCSGDLQRRFHMVLYYNKASETDSGWIVAGWFKESLGMAIVESPLFGGRLRKFEDNNDLELVSNDSGVRLVEANVEINMADFIDLKNKENIETELVFWEDIHETNPQFSPLFYVQVTNFKCGGYSIGISCSLFLADPFVMTNFLKNWSKIHNKLISQIDAPKIPPFYTPNLRKIGLLPTISTSLTTKNKTTQTLIFKIPKNPLNLNNNFLKNLASKCIGEIEEKIGTNLSSKFSLFVTERANSENVIKVETCIKEEIIKDECGLIYKNGGLISVSWDDLGGDKVIFNEGNKAINISCWIINAENQDLVMITPSTDEDSSQLNIIITVTN	0	0	1	2	0	0	0	0	0
NbS00021683g0004.1 protein AED:0.23 eAED:0.23 QI:101|0.25|0.2|0.8|1|1|5|0|212; (*GB) gi|170773910|gb|ACB32231.1| (e_value=4e-85) nascent polypeptide associated complex alpha [Solanum chacoense];; (*SWP) sp|Q9M612|NACA_PINTA (e_value=6e-67) Nascent polypeptide-associated complex subunit alpha-like protein OS=Pinus taeda PE=2 SV=1;; (*TAIR) AT3G12390.1 (e_value=4e-61) | Symbols: | Nascent polypepti…	MTAQSPEEILAAHLEQQKIEFWLWFYGKSEKKSRKAMIKLGMKPIPGVSRVTVKKSKNVKDGDASGRSKQSRSEKKSRKAMIKLGMKPIPGVSRVTVKKSKNILFVISKPDVFKSPASDTYVIFGEAKIEDLSSQLQSQAAEQFKAPNLSNVISKPEPSTVAQDDEDVDETGIEPKDIELVMTQAGVSRAKAVKALKGADGDIVSAIMELTN	0	0	1	6	0	0	0	0	0
NbS00024701g0001.1 protein AED:0.17 eAED:0.17 QI:101|0.76|0.78|1|0.92|0.85|14|484|691; (*SWP) sp|Q9T074|PCKA_ARATH (e_value=0.0) Phosphoenolpyruvate carboxykinase [ATP] OS=Arabidopsis thaliana GN=PCKA PE=1 SV=1;; (*TAIR) AT4G37870.1 (e_value=0.0) | Symbols: PCK1, PEPCK | phosphoenolpyruvate carboxykinase 1 | chr4:17802974-17806332 REVERSE LENGTH=671;; (*ITAG) Solyc04g076880.2.1 (e_value=0.0) geno…	MASNGNGEFSFDSKRRSGLPKIQTQKTDEDNVVCHDDSATPVKAQTLDELHSLQKKKSAPTTPIKSPHAFGVPVSEEERHKQQLQSISASLASLTRETGPKVVKGDPARQAETPKVAQSHATHHHHAPTLNISDSALKFTHILYNLSPAELYEQAIKYEKGSFITSSGALATLSGAKTGRSPRDKRVVRDETTEKDLWWGKGSPNIEMDEQTFLINRERAVDYLCSLEKVYVNDQFLNWDPNNRIKVRIVSARAYHSLFMHNMCIRPTAEELEEFGTPDFTIYNAGQFPCNRYTHYMTSSTSIDVNLPRKEMVILGTQYAGEMKKGLFSLMHYLMPKRQILSLHSGCNMGKGGDVALFFGLSGTGKTTLSTDHNRYLIGDDEHCWSDHGVSNIEGGCYA…	0	0	1	3	0	0	0	0	0
NbS00025815g0005.1 protein AED:0.20 eAED:0.20 QI:105|1|1|1|0.91|0.84|13|134|662; (*SWP) sp|Q9T074|PCKA_ARATH (e_value=0.0) Phosphoenolpyruvate carboxykinase [ATP] OS=Arabidopsis thaliana GN=PCKA PE=1 SV=1;; (*TAIR) AT4G37870.1 (e_value=0.0) | Symbols: PCK1, PEPCK | phosphoenolpyruvate carboxykinase 1 | chr4:17802974-17806332 REVERSE LENGTH=671;; (*ITAG) Solyc04g076880.2.1 (e_value=0.0) genomic_re…	MASNGNGEFSFDSKRRSGLPKIQTQKTDDDNVVCHDDSATPVKAQTLDELHSLQKKKSAPTTPIKSPHAFGVAVSEEERQKQQLQSISASLASLTRETGPKVVKGDPARQAETPKVAQSHATHHHHAPTLNISDSALKFTHILYNLSPAELYEQAIKYEKGSFITSSGALATLSGAKTGRSPRDKRVVRDETTEKDLWWGKGSPNIEMDEQTFLINRERAVDYLCSLEKVYVNDQFLNWDPNNRIKVRIVSARAYHSLFMHNMCIRPTAEELEEFGTPDFTIYNAGQFPCNRYTHYMTSSTSIDVNLARKEMVILGTQYAGEMKKGLFSLMHYLMPMRQILSLHSGCNMGKGGDVALFFGLSGTGKTTLSTDHNRYLIGDDEHCWSDHGVSNIEGGCYA…	0	0	1	3	0	0	0	0	0
NbS00002704g0011.1 protein AED:0.32 eAED:0.32 QI:221|0.33|0.5|1|0.66|0.75|4|0|138; (*GB) gi|58892561|gb|AAW83128.1| (e_value=6e-72) photosystem I reaction center subunit X PSI-K [Nicotiana benthamiana];; (*SWP) sp|Q9SUI5|PSAK_ARATH (e_value=3e-61) Photosystem I reaction center subunit psaK, chloroplastic OS=Arabidopsis thaliana GN=PSAK PE=2 SV=2;; (*TAIR) AT1G30380.1 (e_value=3e-62) | Symbols: PS…	MAATMMTSLPQFNGLKPKTFSTSPVQGLVAVQPMRRKGQGALGARCDFIGSPTNLIMVTSTSLMLFAGRFGLAPSANRKATAGLKLEATAGLKLEVRDSGLQTGDPARFTLADTLACGVVGHIIGVGVVLGLKNIGAL	0	0	0	2	0	0	0	1	0
NbS00058693g0007.1 protein AED:0.21 eAED:0.21 QI:0|1|0.78|1|1|1|14|78|492; (*GB) gi|302701824|gb|ADL61840.1| (e_value=0.0) delta 1-pyrroline-5-carboxylate synthetase [Nicotiana tabacum];; (*SWP) sp|Q96480|P5CS_SOLLC (e_value=0.0) Delta-1-pyrroline-5-carboxylate synthase OS=Solanum lycopersicum GN=PRO2 PE=2 SV=1;; (*TAIR) AT3G55610.1 (e_value=0.0) | Symbols: P5CS2 | delta 1-pyrroline-5-carboxylate…	MRIICSKALFFRSSLRKLISLSFLLPLPKISADSLSLSVCAFAGISGFAVDSIIKVLHGECIGTLFHRDANKLASTGEIGAREMAVSARECSRRLQAISSQERSKILQDIADALEANEKTILAENEADVVAAQQAGYEKTLISRLALKPGQISTLANSVRVLANMDEPIGRILKRTEVADGFILEKSSSPLGVLLIIFESRPDALVQIASLAVRSGNGLLLKGGKEAKRSNAILHKVITSAIPGTVGERLIGLVTSREEIPELLKHDDVIDLVIPRGSNKLVSQIKASTKIPVLGHADGICHVYVDKSADMDMAKRVVVDAKTDYPAACNAMETLLVHKDLAQNGGLNDLIVELQTKGVSLYGGPKASSLLKIPQAHTFHHEYGSLACTVEVVEDVYAA…	0	0	0	2	0	0	0	0	0
NbS00001260g0014.1 protein AED:0.21 eAED:0.21 QI:0|0.83|0.57|1|1|1|7|0|598; (*GB) gi|359484512|ref|XP_003633115.1| (e_value=0.0) PREDICTED: asparaginyl-tRNA synthetase, cytoplasmic 1-like [Vitis vinifera];; (*SWP) sp|Q9SW96|SYNC1_ARATH (e_value=0.0) Asparagine--tRNA ligase, cytoplasmic 1 OS=Arabidopsis thaliana GN=SYNC1 PE=2 SV=1;; (*TAIR) AT5G56680.1 (e_value=0.0) | Symbols: SYNC1, EMB2755, SYNC…	MSFDSTPPAVEKLTLNATIVDEAKFSQRVPIRSIVGRPDGGAGLAGNVVKIGGWVKTGREQGKGSFAFLEVNDGSCPANLQVIVDASVHKLGDLVLTGTCVHVEGELKVPPEGAKQKVELRVQKVLSVGTVDAAKYPLPKTKLTLEFLRDFVHLRPRTNTISAIARIRNALAYATHTFFQKNGFLYIHTPIVTASDCEGAGEMFQVTTLINEAEKLEKELKENPAPSESEIKAAEQLVKEKGEAVAQLKANKGSIEKSGASILDINKQISAAKSGASIVDINKQISAAVAELQRAKENLLKLQEKFKLGERCRLSGGIPKKDGKVDYSEDFFARQAFLTVSGQLQVETYACALSSVYTFGPTFRAEQSHTSRHLAEFWMVEPEIAFADLQDDMNCAEAY…	0	0	0	2	0	0	0	0	0
NbS00015067g0012.1 protein AED:0.26 eAED:0.26 QI:351|0.91|0.91|1|0.91|0.83|24|0|1433; (*GB) gi|359489732|ref|XP_002278370.2| (e_value=0.0) PREDICTED: protein KIAA0664 homolog [Vitis vinifera];; (*SWP) sp|O15818|K0664_DICDI (e_value=4e-45) Protein KIAA0664 homolog OS=Dictyostelium discoideum GN=cluA PE=1 SV=2;; (*TAIR) AT1G01320.2 (e_value=0.0) | Symbols: | Tetratricopeptide repeat (TPR)-like supe…	MAPNKNGRGKTKGDKKKKEEKVLPVVMDIMINLPDETQVILKGISTDRIIDVRRLLSVNTTTCNITNFSLSHEVRGPSLKDTVDVSALKPCLLNLVEEDYDEESATAHVRRLLDIVACTTSFGPSGSSGKELKSETSKNARGAQDNKSAKKSNKVRANDKLPSPPQSPTPAQQLGKDTAAVDVEGEMSNTCPKIGSFYEFFSLSHLTPPLQFIRRATRQQDDEVLPDDHLFSLEVKLCNGKLVIIEACRKGFYNFGKQGILCHNLVDLLRQLSRAFDNAYDDLMKAFLERNKFGNLPYGFRANTWLIPPVGAQLLSIFPPLPVEDEKWGANGGGLGRDGKSDLLPYANEFLNVASMPCKTTEERQIRDRKAFLLHSLFVDVAIFRAISAVKHVMENVKP…	0	0	0	2	0	0	0	0	0
NbS00021924g0111.1 protein AED:0.06 eAED:0.06 QI:0|1|1|1|1|1|2|325|356	MSYYPKGYRREDDDGAEFDEYDPTPYGGGYDIALTYGRPLPPSDETCYQTTSASDEFDYDRPQYSSYAEPSAYGDEALESEYQSYSRPKPRPTPSYHRPSEEEGEVYEQPQADYGFQPGMNRPGGGYGGESEYGRKSEYEEPASEYGSGYGRKSECEEPKPDYGSGYGRKSEYVEPVSEYGSGYGRKSEYEEPKPEYGSGYGRKSEYEEPTSEYGSGYGRKSGYEEPAPEYGSGYRRKSEYEEPSSEYGSGYERKTEPEEDGSGGYGRKPSYGQDEEGERRPSYGRSSYQTEEGEGYERPRYGRSEEEDYRRPSYERRGDDDDEGYGRKKYGDDDSDDDEEKKQHYKHHHRKHYDD	0	0	0	2	0	0	0	0	0
NbS00014581g0001.1 protein AED:0.17 eAED:0.17 QI:214|0.83|0.71|1|0.83|0.71|7|0|390; (*GB) gi|4827251|dbj|BAA77604.1| (e_value=0.0) plastidic aldolase NPALDP1 [Nicotiana paniculata];; (*SWP) sp|Q944G9|ALFC2_ARATH (e_value=0.0) Probable fructose-bisphosphate aldolase 2, chloroplastic OS=Arabidopsis thaliana GN=FBA2 PE=1 SV=2;; (*TAIR) AT4G38970.1 (e_value=0.0) | Symbols: FBA2 | fructose-bisphosphat…	MASASLLKTSPAIGKTDFIKGQALRQPSVSIRCHPAPPSGLTVRASSYADELVKTAKTVASPGRGILAMDESNATCGKRLASIGLENTEANRQAYRTLLVSAPGLGQYISGAILFEETLYQSTVDGKKIVDVLHEQNIVPGIKVDKGLVPLAGSNDESWCQGLDGLASRSAAYYQQGARFAKCIPNGPSALAVKEAAWGLARYAAISQDNGLVPIVEPEILLDGEHNIDRTFEVAQKVWAEVFFYLAENNVMFEGILLKPSMVTPGAECKERATPDQVADYTLKLLQRRIPPAVPGIMFLSGGQSEVEATLNLNAMNQSPNPWHVSFSYARALQNTCLKTWGGRPENVEAAQEALLIRANANSLAQLGKYTGEGESEEAKKGMFVKGYVY	0	0	0	2	0	0	0	1	0
NbS00035899g0008.1 protein AED:0.03 eAED:0.03 QI:0|0|0|0.66|0.5|0.66|3|0|480; (*GB) gi|225452887|ref|XP_002283932.1| (e_value=2e-65) PREDICTED: uncharacterized protein At5g39570 [Vitis vinifera];; (*SWP) sp|Q9FKA5|Y5957_ARATH (e_value=8e-33) Uncharacterized protein At5g39570 OS=Arabidopsis thaliana GN=At5g39570 PE=1 SV=1;; (*TAIR) AT5G39570.1 (e_value=6e-34) | Symbols: | FUNCTIONS IN: molecular_f…	MSYYPKGYHGEDDDGAEFDEYDPTPYGGGYDIALTYGHPLPPSDETCYQTSSASDEFDYDRPQYSSYAEPSAYGDEALETEYQSYSRPKPRPTPYHRPSEEEGEAYEQPQADYGFQPGMNRPGGGYGGESEYGSGYGRKSEYEEPASEYGSGYGRKSEYEEPKPDYGSGYGRKSEYVEPVSEYGSGYGRKSEYEEPKPEYGSGYGRKSEYEEPTSEYGSGYGRKSGYEEPAPEYGSGYRRKSEYEEPSSEYGSGYERKTEPEEDGSGGYGRKPSYGQDEEGERRPSYGRSSYQTEEGEGYERPRYGRSEEEDYRRPSYERRGDDDDEGYGRKKYYSLLGSGYGRKSEYEEPAPEYGSEYRRKSEYEEPSSEYGSGYERRTESEEYGSGGYGRKPSYGQE…	0	0	0	2	0	0	0	0	0
NbS00041386g0010.1 protein AED:0.15 eAED:0.15 QI:502|1|1|1|1|1|6|318|312; (*SWP) sp|A2Z7B3|GME1_ORYSI (e_value=0.0) GDP-mannose 3,5-epimerase 1 OS=Oryza sativa subsp. indica GN=OsI_032456 PE=2 SV=1;; (*TAIR) AT5G28840.2 (e_value=0.0) | Symbols: GME | GDP-D-mannose 3',5'-epimerase | chr5:10862472-10864024 REVERSE LENGTH=377;; (*ITAG) Solyc01g097340.2.1 (e_value=0.0) genomic_reference:SL2.40ch01 ge…	MTEDMFCHEFHLVDLRVMDNCLKVTKDVDHVFNLAADMGGMGFIQSNHSVIFYNNTMISFNMMEAARINGVKRFFYASSACIYPEFKQLETNVSLKESDAWPAEPQDAYGLEKLATEELCKHYNKDFGIECRIGRFHNIYGPFGTWKGGREKAPAAFCRKAQTAIDKFEMWGDGLQTRSFTFIDECVEGVLRLTKSDFREPVNIGSDEMVSMNEMAEMVLSFEDKKLPIHHIPGPEGVRGRNSDNTLIKEKLGWAPTMRLKDGLRITFFWIKEQIEKEKSQGVNIANYGSSKVVGTQAPVELGCLRAADGKE	0	0	0	2	0	0	0	0	0
NbS00041372g0008.1 protein AED:0.22 eAED:0.22 QI:8|0.66|0.5|1|1|1|4|0|197; (*SWP) sp|P26573|RBS8_NICPL (e_value=5e-110) Ribulose bisphosphate carboxylase small chain 8B, chloroplastic OS=Nicotiana plumbaginifolia GN=RBCS-8B PE=3 SV=1;; (*TAIR) AT5G38410.1 (e_value=1e-87) | Symbols: | Ribulose bisphosphate carboxylase (small chain) family protein | chr5:15377501-15378306 REVERSE LENGTH=181;; (*ITA…	MASSVMSSAAAVATGANAAQANMVAPFTGLKSASSFPVTRKQNLDITSIASNGGRVQCMQVWPPINMKKYETLSYLPDLSQEQLLSEVEYLLKNGWVPCLEFETERGFVYREHHSSPGYYDGRYWTMWKLPMFGCTDATQVLAEVEEAKKAYPQAWVLAEVEEAKKAYPQAWVRIIGFDNVRQVQCISFIAYKPEGY	0	0	0	2	0	0	0	1	0
NbS00012584g0001.1 protein AED:0.12 eAED:0.12 QI:0|-1|0|1|-1|1|1|0|370; (*GB) gi|231610|sp|P29790.1|ATPG_TOBAC (e_value=0.0) RecName: Full=ATP synthase gamma chain, chloroplastic; AltName: Full=F-ATPase gamma subunit; Flags: Precursor;; (*SWP) sp|P29790|ATPG_TOBAC (e_value=0.0) ATP synthase gamma chain, chloroplastic OS=Nicotiana tabacum GN=ATPC PE=1 SV=1;; (*TAIR) AT4G04640.1 (e_value=0.0) | Sym…	MLVSSKPSLSDSSALSFRSSVNPFQLPNHNSSGPSNPSRSSSVTPVHCGLRDLRDRIDSVKNTQKITEAMKLVAAAKVRRAQEAVVGARPFSETLVEVLYNINEQLQTDDIDVPLTKVRPVKKVALVVVTGDRGLCGGFNNYLIKKAEARIRDLKALGIEYTIISVGKKGNSYFLRRPYIPVDKFLEGSNLPTAKDAQAIADDVFSLFVSEEVDKVELLYTKFVSLVKSEPVIHTLLPLSPKGEICDINGNCVDAAEDEFFRLTTKEGKLTVERDIMRTKTTDFSPILQFEQDPVQILDALLPLYLNSQILRALQESLASELAARMSAMSAATDNASELKKNLSRAYNRQRQAKITGEILEIVAGADALV	0	1	0	2	1	0	1	0	0
NbS00023165g0008.1 protein AED:0.11 eAED:0.12 QI:0|0|0|1|0|0.5|2|0|394; (*GB) gi|231610|sp|P29790.1|ATPG_TOBAC (e_value=0.0) RecName: Full=ATP synthase gamma chain, chloroplastic; AltName: Full=F-ATPase gamma subunit; Flags: Precursor;; (*SWP) sp|P29790|ATPG_TOBAC (e_value=0.0) ATP synthase gamma chain, chloroplastic OS=Nicotiana tabacum GN=ATPC PE=1 SV=1;; (*TAIR) AT4G04640.1 (e_value=0.0) | Sym…	MSCSNLTMLVSSKPALSDSSALSFRSSLSPFQIPNHNSSGHSNPSRSSSVTPVHCGLRDLRERIDSVKNTQKITEAMKLVAAAKVRRAQEAVVGARPFSETLVEVLYNINEQLQTDDIDVPLTKVRPVKKVALVVVTGDRGLCGGFNNYLIKKAEARIKDLKALGIEYTIISVGKKGNSYFLRRPYIPVDKFLEGSNLPTAKDAQAIADDVFSLFVSEEVDKVELLYTKFVSLVKSEPVIHTLLPLSPKGEICDINGNCQKMSSLPKGEICDINGNCVDAAEDEFFRLTTKEGKLTVERDIMRTKTTDFSPILQFEQDPVQILDALLPLYLNSQILRALQESLASELAARMSAMSAATDNASELKKNLSRAYNRQRQAKITGEILEIVAGADAL	0	1	0	2	1	0	1	0	0
NbS00006821g0002.1 protein AED:0.20 eAED:0.20 QI:0|0.5|0.57|1|1|1|7|278|508; (*SWP) sp|Q42961|PGKH_TOBAC (e_value=0.0) Phosphoglycerate kinase, chloroplastic OS=Nicotiana tabacum PE=2 SV=1;; (*TAIR) AT1G56190.1 (e_value=0.0) | Symbols: | Phosphoglycerate kinase family protein | chr1:21028403-21030454 FORWARD LENGTH=478;; (*ITAG) Solyc07g066610.2.1 (e_value=0.0) genomic_reference:SL2.40ch07 gene_r…	MASATASHTLCAIPATSSSTTNKAIAPSSARFLSKTPLRRLGFAGAAADSLFTNHVATKLRSIKSSSKPVRGVASMAKKSVGDLTAAELKGKKVFKSVGDLTAAELKGKNVFVRADLNVPLDDNQNITDDTRIRAAVPTIKHLMANGAKVILSSHLGRPKGVTPKYSLAPLVPRLSELLGIQVVKAEDCIGPEVEKLVASLPEGGVLLLENVRFYKEEEKNEPEFAKKLASLADLYVNDAFGTAHRAHASTEGVTKFLKPSELDYLVGAVSNPKRPFAAIVGGSKVSSKIGVIESLLEKCDILLLGGGMIFTFYKAQGLSVGSSLVEEDKLELATSLLEKAKEKGVSLLLPSDVVIADKFAPDANSKSLLHTDCVEKTNLFWLLQIVPSSAIPDGWMGL…	0	0	0	2	0	0	0	1	0
NbS00044592g0017.1 protein AED:0.22 eAED:0.22 QI:367|0.90|0.83|1|0.81|0.83|12|0|795; (*GB) gi|8439545|gb|AAF74983.1|AF082893_1 (e_value=0.0) methionine synthase [Solanum tuberosum];; (*SWP) sp|Q42699|METE_CATRO (e_value=0.0) 5-methyltetrahydropteroyltriglutamate--homocysteine methyltransferase OS=Catharanthus roseus GN=METE PE=2 SV=1;; (*TAIR) AT5G17920.2 (e_value=0.0) | Symbols: ATCIMS | Cobalam…	MASHIVGYPRMGPKRELKFALESFWDGKSSAEDLKKMADAGTKYIPSNTFSYYDQVLDTTAMLGAVPSRYNWTGGEIGFDTYFSMARGNASVPAMEMTKWFDTNYHFIVPELGPDVNFSYASHKAVEEYKEAKGLGVNTVPVLIGPVSYLLLSKPAKGVEKSFPLLSLLDKILPIYKEVISELKAAGASWIQFDEPTLVLDLEAHQLEAFTKAYAELESTISGLDVLIETYFADVPAGAFKTLTALKGVTAFGFDLVRGTQTLDLIKGGFPSGKYLFAGVVDGRNIWANDLAASLELLKSLEGIVGKDKLVVSTSCSLLHTAVDLINETKLDDEIKSWLAFAAQKVVEVNALAKALAGDKDEAFFSASAAAQASRKTSPRVTNEAVQKAAAALRGSDHR…	0	0	2	0	2	0	0	0	0
NbS00014580g0002.1 protein AED:0.38 eAED:0.38 QI:0|-1|0|1|-1|1|1|0|265; (*GB) gi|3036944|dbj|BAA25389.1| (e_value=0.0) light harvesting chlorophyll a/b-binding protein [Nicotiana sylvestris];; (*SWP) sp|P27493|CB22_TOBAC (e_value=0.0) Chlorophyll a-b binding protein 21, chloroplastic OS=Nicotiana tabacum GN=CAB21 PE=2 SV=1;; (*TAIR) AT1G29930.1 (e_value=4e-177) | Symbols: CAB1, AB140, CAB140, LHC…	MAAATMALSSPSFAGQAVKLSPSASEITGNGRVSMRKTVAKPVASSSPWYGPDRVKYLGPFSGESPSYLTGEFPGDYGWDTAGLSADPETFAKNRELEVIHCRWAMLGALGCVFPELLARNGVKFGEAVWFKAGSQIFSEGGLDYLGNPSLVHAQSILAIWACQVILMGAVEGYRVAGGPLGEVVDPLYPGGSFDPLGLAEDPEAFAELKVKEIKNGRLAMFSMFGFFVQAIVTGKGPLENLADHLADPVNNNAWAYATNFVPGK	0	0	2	0	3	0	1	0	0
NbS00022063g0009.1 protein AED:0.10 eAED:0.10 QI:183|1|0.90|1|1|1|11|285|785; (*GB) gi|115361539|gb|ABI95860.1| (e_value=0.0) methionine synthase [Nicotiana suaveolens];; (*SWP) sp|Q42699|METE_CATRO (e_value=0.0) 5-methyltetrahydropteroyltriglutamate--homocysteine methyltransferase OS=Catharanthus roseus GN=METE PE=2 SV=1;; (*TAIR) AT5G17920.2 (e_value=0.0) | Symbols: ATCIMS | Cobalamin-independe…	MASHIVGYPRMGPKRELKFALESFWDGKSTAEDLKKVSADLRSSIWKQMADAGIKYIPSNTFSYYDQVLDTTAMLGAVPSRYNWTGGEIGFDTYFSMARGNASVPAMEMTKWFDTNYHFIVPELGPDVNFSYASHKAVDEYKEAKGLGVDTVPVLVGPVSYLLLSKPAKGVEKSFPLLSLLDKILPIYKEVIAELKAAGASWIQLDEPTLVLDLEAHKLEAFTKAYGDLESSLSGLNVIVETYFADVPAEAFKTLTGLKGVTGFGFDLVRGTQTLDLIKGGFPSGKYLFAGVVDGRNIWANDLAASLNLLQSLEGIVGKDKLVVSTSCSLLHTAVDLVNEPKLDNEIKSWLAFAAQKVVEVNALAKALTGAKDEAFFSANAAAQASRKSSPRVTNEAVQ…	0	1	9	1	6	0	1	1	0
NbS00016746g0013.1 protein AED:0.06 eAED:0.06 QI:187|1|1|1|1|1|2|478|761; (*ITAG) Solyc01g102310.2.1 (e_value=2e-110) genomic_reference:SL2.40ch01 gene_region:82889387-82892936 transcript_region:SL2.40ch01:82889387..82892936- functional_description:"Unknown Protein (AHRD V1)";	MATETVSSDHLIPASEKIEKEVLDEVKTMEVESVPPTKDNGIKPIEEDSPSPVVSSTESVEKIEDTKREAPLIEETKKDGEEEKPKAEEPGSTIAEEVKKVDNEEKSNAEEPSQVIVEEVKKADEEEKPIADIAAPATVEEVKKADEVEKPIANKAAPSIVEEVKKADEEEKPTIEEQPATIIEELKKTDGEDKTKADEPIPVKVEEVKKADEEPTIEEPPPTIIEEKKSDEEEKPIADEPLPLAIEEVKKDDEDQKPNADEISPPLPTTDEEEKPKAEELPSIPATTAESEEKTGDKEIEPPTVEEVKKLDEAPALDVTSKDVPELTKEPVPEPEAQSIPEKVVDVTEGELEVQPEAEKVEILEKGSENEPVNEKPEEQPTTVDVVETPVGAVDNKNE…	0	0	2	4	5	2	0	1	0
NbS00015734g0222.1 protein AED:0.11 eAED:0.12 QI:1214|1|0.90|1|1|1|11|381|1138	MTFEEFKRSTILSPVSQLADLFLVAGDTHATLYTGSKAMHSQILSIFNEDAGKFKQFSAAQNMKITLQRRYKNAVVDSSRQKQLEIFLGLRLFKHFPSIPIQPLHVASRPTGCFLKPILNIFPISDGGASLLSFKRKAMTWVSPQATDVVELFIYLGEPCHVCQLLLTVAHGSDDSTFPSTVDVRIGRYLDGLKLVLEGASVPQCANGTNILIPLSGPISEEDMAITGAGSRRHAQDTSTLPLLYDFEELEGEVDFLTRVVALTFYPAADGGGPITLGEIEILGVPLPWRFILKHDGSVTRFAEQAETHHDINNPFLTETEHNPFASALATDAQANSSADLWVDLLTGESRISDSNRQPATETVFHGGDDLLDFLDDAIVQQPKEANSFSKITSKGPTD…	0	0	8	7	0	0	2	0	0
NbS00026261g0005.1 protein AED:0.37 eAED:0.38 QI:0|0.83|0.57|1|1|1|7|0|399; (*SWP) sp|Q2MHE4|HT1_ARATH (e_value=4e-60) Serine/threonine-protein kinase HT1 OS=Arabidopsis thaliana GN=HT1 PE=1 SV=1;; (*TAIR) AT3G22750.1 (e_value=0.0) | Symbols: | Protein kinase superfamily protein | chr3:8037364-8039096 REVERSE LENGTH=378;; (*ITAG) Solyc09g082470.2.1 (e_value=0.0) genomic_reference:SL2.40ch09 gene_…	MDLKSEEGEEKVLKLDNDEGEEGEVVSKLKGIALESKSPGSISSKDMIFRADKIDLKSLDVQLEKHLSRVWSSNLEKNNHRPKEVWEIDPLKLEIRYLVAKGTYGTVYRGTYDNQDVAVKLLDWGEDGMATAAETAALRSSFRQEVAVWHKLDHPNVTKFVGASMGTSNLKIPSKNPSEGYTTLPSRACCVLVEFLPGGTLKNYLYKNRKKKLAFKIVIQLALDLSRGLSYLHSEKIVHRDVKAENMLLDTNRTLKIADFGVARVEAQNPKDMTGETGTLGYMAPEVLDGKPYNRKCDVYSFGICLWEIYCCDLPYPDLSFAEVSSAVVRQNLRPDIPRCCPSSLSHIMKKCWDANPDKRPEMDEVVKLLEAIDTSKGGGMIPEDQAGGCFCFAPTRGP	0	0	2	0	0	0	4	0	0
NbS00037026g0004.1 protein AED:0.17 eAED:0.17 QI:0|1|0.5|1|1|1|2|0|447; (*GB) gi|3869088|dbj|BAA34348.1| (e_value=0.0) elongation factor-1 alpha [Nicotiana paniculata];; (*SWP) sp|P43643|EF1A_TOBAC (e_value=0.0) Elongation factor 1-alpha OS=Nicotiana tabacum PE=2 SV=1;; (*TAIR) AT5G60390.3 (e_value=0.0) | Symbols: | GTP binding Elongation factor Tu family protein | chr5:24289226-24290675 FORWARD …	MGKEKVHINIVVIGHVDSGKSTTTGHLIYKLGGIDKRVIERFEKEAAEMNKRSFKYAWVLDKLKAERERGITIDIALWKFETTKYYCTVIDAPGHRDFIKNMITGTSQADCAVLIIDSTTGGFEAGISKDGQTREHALLAFTLGVKQMICCCNKMDATTPKYSKARYDEIVKEVSSYLKKVGYNPDKIPFVPISGFEGDNMIERSTNLDWYKGPTLLDALDQINEPKRPSDKPLRLPLQDVYKIGGIGTVPVGRVETGVLKPGMVVTFGPTGLTTEVKSVEMHHEALQEALPGDNVGFNVKNVAVKDLKRGFVASNSKDDPAKGASSFTSQVIIMNHPGQIGNGYAPVLDCHTSHIAVKFAEILTKIDRRSGKELEKEPKFLKNGDAGMVKMIPTKPMV…	0	1	3	4	1	0	3	2	1
NbS00060738g0002.1 protein AED:0.07 eAED:0.09 QI:0|0.33|0.25|1|1|1|4|0|458; (*SWP) sp|P43643|EF1A_TOBAC (e_value=0.0) Elongation factor 1-alpha OS=Nicotiana tabacum PE=2 SV=1;; (*TAIR) AT5G60390.3 (e_value=0.0) | Symbols: | GTP binding Elongation factor Tu family protein | chr5:24289226-24290675 FORWARD LENGTH=449;; (*ITAG) Solyc11g069700.1.1 (e_value=0.0) evidence_code:10F1H1E1IEG genomic_refere…	MGKEKVHINIVVIGHVDSGKSTTTGHLIYKLGGIDKRVIERFEKEAAEMNKRSFKYAWVLDKLKAERERGITIDIAFLRPPNTTAPERERGITIDIALWKFETTKYYCTVIDAPGHRDFIKNMITGTSQADCAVLIIDSTTGGFEAGISKDGQTREHALLAFTLGVKQMICCCNKMDATTPKYSKARYDEIVKEVSSYLKKVGYNPDKIPFVPISGFEGDNMIERSTNLDWYKGPTLLEALDQINEPKRPTDKPLRLPLQDVYKIGGIGTVPVGRVETGVLKPGMVVTFGPTGLTTEVKSVEMHHEALQEALPGDNVGFNVKNVAVKDLKRGFVASNSKDDPAKGASSFTSQIGNGYAPVLDCHTSHIAVKFAEILTKIDRRSGKELEKEPKFLKNGDA…	0	1	3	4	1	0	3	2	1
NbS00010399g0101.1 protein AED:0.11 eAED:0.11 QI:0|0.5|0.33|1|1|1|3|0|561	MSSSRRLRDLQAQPGNKICVDCSQKNPQWASVSYGVFMCLECSGKHRGLGVHISFVRSVTMDSWSEIQIRKMELGGNDSLNKFMSQYGISKETDIVTKYNTKAASVYRDRIQSLAEGKPWRDPPVVNVSYGVFMCLECSGKHRGLGVHISFVRSVTMDSWSEIQIRKMELGGNDSLNKFMSQYGISKETDIVTKYNTKAASVYRDRIQSLAEGKPWRDPPVVKEALNGPPSNITSSRPPLSRGSSGGGGGSWDSWDNNDDGGFSGSGKNNVRRNQTVGDFRSGDSGASAPARSRSTTDITKEQYEASAHNKDSFFARKMAENESRPDGLPPSQGGKYVGFGSSPAPVPSRNTINHQGDVLSAVTQVGFGRLSMIAATAAQSAASVVQVGTKELTSKVKE…	0	0	3	4	0	0	1	2	0
NbS00025364g0011.1 protein AED:0.02 eAED:0.02 QI:10|1|1|1|1|1|4|286|413; (*GB) gi|2500517|sp|Q40471.1|IF4A9_TOBAC (e_value=0.0) RecName: Full=Eukaryotic initiation factor 4A-9; Short=eIF-4A-9; AltName: Full=ATP-dependent RNA helicase eIF4A-9;; (*SWP) sp|Q40471|IF4A9_TOBAC (e_value=0.0) Eukaryotic initiation factor 4A-9 OS=Nicotiana tabacum PE=2 SV=1;; (*TAIR) AT3G13920.1 (e_value=0.0) | Symbols: …	MAGAAPEGSQFDARQYDSKMTELLNAEGQDFFTSYDEVYDSFDAMGLKENLLRGIYAYGFEKPSAIQQRGIVPFCKGLDVIQQAQSGTGKTATFCSGILQQLDYELLDCQALVLAPTRELAQQIEKVMRALGDYLGVKVHACVGGTSVREDQRILSSGVHVVVGTPGRVFDMLRRQSLRPDHIKMFVLDEADEMLSRGFKDQIYDIFQLLPPKIQVGVFSATMPPEALEITRKFMNKPVRILVKRDELTLEGIKQFYVNVDKEEWKLETLCDLYETLAITQSVIFVNTRRKVDWLTDKMRSRDHTVSATHGDMDQNTRDIIMREFRSGSSRVLITTDLLARGIDVQQVSLVINYDLPTQPENYLHRIGRSGRFGRKGVSINFVTNDDERMLSDIQRFYN…	0	1	5	2	1	0	1	2	1
NbS00044851g0011.1 protein AED:0.16 eAED:0.16 QI:8|1|1|1|1|1|4|266|413; (*GB) gi|2500517|sp|Q40471.1|IF4A9_TOBAC (e_value=0.0) RecName: Full=Eukaryotic initiation factor 4A-9; Short=eIF-4A-9; AltName: Full=ATP-dependent RNA helicase eIF4A-9;; (*SWP) sp|Q40471|IF4A9_TOBAC (e_value=0.0) Eukaryotic initiation factor 4A-9 OS=Nicotiana tabacum PE=2 SV=1;; (*TAIR) AT3G13920.1 (e_value=0.0) | Symbols: E…	MAGAAPEGSQFDARQYDSKMTELLNAEGQDFFTSYDEVYDSFDAMGLKENLLRGIYAYGFEKPSAIQQRGIVPFCKGLDVIQQAQSGTGKTATFCSGILQQLDYELLDCQALVLAPTRELAQQIEKVMRALGDYLGVKVHACVGGTSVREDQRILSSGVHVVVGTPGRVFDMLRRQSLRPDHIKMFVLDEADEMLSRGFKDQIYDIFQLLPPKIQVGVFSATMPPEALEITRKFMNKPVRILVKRDELTLEGIKQFYVNVDKEEWKLETLCDLYETLAITQSVIFVNTRRKVDWLTDKMRSRDHTVSATHGDMDQNTRDIIMREFRSGSSRVLITTDLLARGIDVQQVSLVINYDLPTQPENYLHRIGRSGRFGRKGVSINFVTNDDERMLSDIQRFYN…	0	1	5	2	1	0	1	2	1
NbS00000884g0011.1 protein AED:0.32 eAED:0.32 QI:206|0.8|0.66|1|0.4|0.5|6|0|313; (*GB) gi|2500521|sp|Q40468.1|IF415_TOBAC (e_value=1e-151) RecName: Full=Eukaryotic initiation factor 4A-15; Short=eIF-4A-15; AltName: Full=ATP-dependent RNA helicase eIF4A-15;; (*SWP) sp|Q40468|IF415_TOBAC (e_value=3e-153) Eukaryotic initiation factor 4A-15 OS=Nicotiana tabacum PE=2 SV=1;; (*TAIR) AT1G54270.1 (e_valu…	MAGAAPEGSQFDARQFDTKMNELLSADGQDFFTSYDEVNDSFDAMGLQENLLRGIYAYGFEKPSAIQQRGIVPFCKGLDVIQQAQSGTGKTATFCSGILQQLAYELLECQALVLAPTRELAQQIEKVMRALGDYLGVKVHACVGGTSVREDQRILSSGVHVVVGTPGRVFDMLRRQSLRPDHMKMFVLDEADEMLSRGFKDQIYDIFQLLPPKIQNTRDIIMREFRSGSSRVLITTDLLARGIDVQQVSLVINFDLPTQPENYLHRIGRSGRFGRKGVAINFATKDDERMLSDIQRFYNVVIEELPANVADLL	0	0	0	2	0	0	0	2	1
NbS00036362g0029.1 protein AED:0.33 eAED:0.33 QI:0|0.5|0.2|0.8|0.5|0.6|5|0|313; (*GB) gi|2500521|sp|Q40468.1|IF415_TOBAC (e_value=8e-153) RecName: Full=Eukaryotic initiation factor 4A-15; Short=eIF-4A-15; AltName: Full=ATP-dependent RNA helicase eIF4A-15;; (*SWP) sp|Q40468|IF415_TOBAC (e_value=2e-154) Eukaryotic initiation factor 4A-15 OS=Nicotiana tabacum PE=2 SV=1;; (*TAIR) AT1G54270.1 (e_value…	MAGAAPEGSQFDARQFDTKMNELLSADGQDFFTSYDEVYDSFDAMGLQENLLRGIYAYGFEKPSAIQQRGIVPFCKGLDVIQQAQSGTGKTATFCSGILQQLAYDLLECQALVLAPTRELAQQIEKVMRALGDYLGVKVHACVGGTSVREDQRILSSGVHVVVGTPGRVFDMLRRQSLRPDHIKMFVLDEADEMLSRGFKDQIYDIFQLLPPKIQNTRDIIMREFRSGSSRVLITTDLLARGIDVQQVSLVINFDLPTQPENYLHRIGRSGRFGRKGVAINFVTKDDERMLSDIQRFYNVVIEELPANVADLL	0	0	0	2	0	0	0	2	1
NbS00017361g0009.1 protein AED:0.18 eAED:0.18 QI:280|1|1|1|0.90|0.83|12|349|765; (*GB) gi|8439545|gb|AAF74983.1|AF082893_1 (e_value=0.0) methionine synthase [Solanum tuberosum];; (*SWP) sp|Q42699|METE_CATRO (e_value=0.0) 5-methyltetrahydropteroyltriglutamate--homocysteine methyltransferase OS=Catharanthus roseus GN=METE PE=2 SV=1;; (*TAIR) AT5G17920.2 (e_value=0.0) | Symbols: ATCIMS | Cobalamin-i…	MASHIVGYPRMGPKRELKFALESFWDGKSSAEDLKKVAADLRSSIWKQMADAGTKYIPSNTFSYYDQVLDTTAMLGAVPARYNWAGGEIAFDTYFSMARGNASVPAMEMTKWFDTNYHFIVPELGPDVNFSYASHKAVDEYKEAKGLGVDTVPVLIGPVSYLLLSKPAKGVEKSFPLLSLLDKILPIYKEVIAELKAAGASWIQFDEPTLVLDLQAHQLEAFTKAYAELESSLSGLNVLTETYFADVPAEAFKTLTALKGVTAFGFDLVRGTQTLDLIKGGFPSGKYLFAGVVDGRNIWANDLAASLNLLQSLEGIVGKDKLVVSTSCSLLHTAVDLINETKLDDEIKSWLAFAAQKVVEVNALAKALAGHKDEAFFSANAAAQASRKSSPRVTNEAVQ…	0	0	0	5	0	0	0	3	0
NbS00047700g0013.1 protein AED:0.19 eAED:0.19 QI:131|0.6|0.63|1|0.8|0.54|11|307|726; (*GB) gi|12643758|sp|Q40565.1|RCA2_TOBAC (e_value=0.0) RecName: Full=Ribulose bisphosphate carboxylase/oxygenase activase 2, chloroplastic; Short=RA 2; Short=RuBisCO activase 2; Flags: Precursor;; (*SWP) sp|Q40565|RCA2_TOBAC (e_value=0.0) Ribulose bisphosphate carboxylase/oxygenase activase 2, chloroplastic OS=Ni…	MATSVSTIGAANKAPKEYVSVGLIKRTFLVQLSLNNSVAGTSVPSTAFFGKTLKKVYGKGVSSPKVTNRSLRIAAEEKDANPKKQTDSDRWKGLVQDFSDDQQDITRGKGMVDSLFQAPTGTGTHHAVLQSYEYVSQGLRQYNMDNTLDGFYIAPAFMDKLVVHITKNFLKLPNIKVPLILGVWGGKGQGKSFQCELVFRKMGINPIMMSAGELESGNAGEPAKLIRQRYREAAEIIRKGNMCCLFINDLDAGAGRMGGTTQYTVNNQMVNATLMNIADNPTNVQLPGMYNKQENARVPIIVTGNDFSTLYAPLIRDGRMEKFYWAPTREDRIGVCKGIFRTDNVPEEAVIKIVDTFPGQSIDFFGALRARVYDDEVRKWVSGTGIEAIGDKLLNTFDG…	0	0	0	2	1	0	1	2	0
NbS00005317g0101.1 protein AED:0.21 eAED:0.21 QI:16|1|1|1|1|1|4|419|377	MADGEDIQPLVCDNGTGMVKAGFAGDDAPRAVFPSIVGRPRHTGVMVGMGQKDAYVGDEAQSKRGILTLKYPIEHGIVSNWDDMEKIWHHTFYNELRVAPEEHPVLLTEAPLNPKANREKMTQIMFETFNVPAMYVAIQAVLSLYASGRTTGIVLDSGDGVSHTVPIYEGYALPHAILRLDLAGRDLTDSLMKILTERGYMFTTTAEREIVRDMKEKLAYVALDYEQELETARSSSSIEKNYELPDGQVITIGAERFRCPEVLFQPSMIGMEAAGIHETTYNSIMKCDVDIRKDLYGNIVLSGGSTMFPGIADRMSKEITALAPSSMKIKVVAPPERKYSVWIGGSILASLSTFQQMWISKGEYDESGPSIVHRKCF	0	1	1	5	0	0	1	2	0
NbS00038296g0004.1 protein AED:0.20 eAED:0.20 QI:16|1|1|1|1|1|4|411|377; (*GB) gi|356509003|ref|XP_003523242.1| (e_value=0.0) PREDICTED: actin-7-like [Glycine max];; (*SWP) sp|P53492|ACT7_ARATH (e_value=0.0) Actin-7 OS=Arabidopsis thaliana GN=ACT7 PE=1 SV=1;; (*TAIR) AT5G09810.1 (e_value=0.0) | Symbols: ACT7 | actin 7 | chr5:3052809-3054220 FORWARD LENGTH=377;; (*ITAG) Solyc03g078400.2.1 (e_value…	MADGEDIQPLVCDNGTGMVKAGFAGDDAPRAVFPSIVGRPRHTGVMVGMGQKDAYVGDEAQSKRGILTLKYPIEHGIVSNWDDMEKIWHHTFYNELRVAPEEHPVLLTEAPLNPKANREKMTQIMFETFNVPAMYVAIQAVLSLYASGRTTGIVLDSGDGVSHTVPIYEGYALPHAILRLDLAGRDLTDSLMKILTERGYMFTTTAEREIVRDMKEKLAYVALDYEQELETARSSSSIEKNYELPDGQVITIGAERFRCPEVLFQPSMIGMEAAGIHETTYNSIMKCDVDIRKDLYGNIVLSGGSTMFPGIADRMSKEITALAPSSMKIKVVAPPERKYSVWIGGSILASLSTFQQMWISKGEYDESGPSIVHRKCF	0	1	1	5	0	0	1	2	0
NbS00040718g0001.1 protein AED:0.27 eAED:0.27 QI:70|1|0.5|1|0|0|2|0|390; (*GB) gi|115361537|gb|ABI95859.1| (e_value=0.0) S-adenosyl-L-methionine synthase [Nicotiana suaveolens];; (*SWP) sp|Q9M7K8|METK1_TOBAC (e_value=0.0) S-adenosylmethionine synthase 1 OS=Nicotiana tabacum GN=SAMS1 PE=2 SV=1;; (*TAIR) AT2G36880.2 (e_value=0.0) | Symbols: MAT3 | methionine adenosyltransferase 3 | chr2:15479721-15…	METFLFTSESVNEGHPDKLCDQVSDAILDACLEQDPESKVACETCTKTNMVMVFGEITTKATVDYEKIVRDTCRGIGFTSADVGLDADNCKVLVNIEQQSPDIAQGVHGHLTKKPEEIGAGDQGHMFGYATDETPELMPLTHVLATKLGAKLTEVRKNKTCPWLRPDGKTQVTVEYKNDNGAMVPIRVHTVLISTQHDETVTNDQIAQDLKEHVIKPVIPAQYLDEKTIFHLNPSGRFVIGGPHGDAGLTGRKIIIDTYGGWGAHGGGAFSGKDPTKVDRSGAYIVRQAAKSVVASGLARRCIVQVSYAIGVAEPLSVFVDTYKTGTIPDKDILALIKENFDFRPGMMSINLDLLRGGNFRYQKTAAYGHFGRDDPDFTWETVKVLKPKA	0	0	0	2	0	0	0	2	0
NbS00009983g0008.1 protein AED:0.11 eAED:0.11 QI:0|0|0|1|0|0.5|2|0|384; (*GB) gi|108864705|gb|ABG22608.1| (e_value=0.0) Heat shock cognate 70 kDa protein, putative, expressed [Oryza sativa Japonica Group];; (*SWP) sp|P27322|HSP72_SOLLC (e_value=0.0) Heat shock cognate 70 kDa protein 2 OS=Solanum lycopersicum GN=HSC-2 PE=2 SV=1;; (*TAIR) AT3G12580.1 (e_value=0.0) | Symbols: HSP70, ATHSP70 | heat s…	MAGKGEGPAIGIDLGTTYSCVGVWQHDRVEIIANDQGNRTTPSYVGFTDSERLIGDAAKNQVAMNPINTATKDAGVISGLNVMRIINEPTAAAIAYGLDKKATSVGEKNVLIFDLGGGTFDVSLLTIEEGIFEVKATAGDTHLGGEDFDNRMVNHFVQEFKRKHKKDITGNPRALRRLRTACERAKRTLSSTAQTTIEIDSLYEGVDFYSTITRARFEELNMDLFRKCMEPVEKCLRDAKMDKSTVHDVVLVGGSTRIPKVQQLLQDFFNGKELCKSINPDEAVAYGAAVQAAILSGEGNEKVQDLLLLDVTPLSLGLETAGGVMTVLIPRNTTIPTKKEQVFSTYSDNQPGVLIQVYEGERARTRDNNLLGKFELSGIPPAPR	0	0	0	6	0	0	0	3	0
NbS00034791g0001.1 protein AED:0.18 eAED:0.18 QI:0|0.73|0.68|1|1|1|16|447|608; (*GB) gi|1762130|gb|AAB39827.1| (e_value=0.0) chaperonin-60 beta subunit [Solanum tuberosum];; (*SWP) sp|Q9LJE4|CPNB2_ARATH (e_value=0.0) Chaperonin 60 subunit beta 2, chloroplastic OS=Arabidopsis thaliana GN=CPN60B2 PE=1 SV=1;; (*TAIR) AT3G13470.1 (e_value=0.0) | Symbols: | TCP-1/cpn60 chaperonin family protein | chr3…	MASTFAGMSSVGPLAAPSTSSNKLSSVANISSSSFGSRRNVILRKARSPKIFAAAKELYFNKDGSAIKRLQVGMNKLADLVGVTLGPKGRNVVLESKYGAPKIVNDGVTVAREVELEDPVENIGAKLVRQAAAKTNDLAGDGTTTSVVLAQGLVAEGVKVVAAGANPVLITRGIEKTTKALVAELKNMSKEVEDNELADVAAVSAGNNPEVGSMIAEAMSKVGRKGVVTLEEGKSAENSLRVVEGMQFDRGYISPYFVTDSEKMSVEYENLYENCKLLLVDKKITNARDLVGVLEDAIRNGYPILIIAEDIEQEALATLVVNKLRATLVVNKLRGALKVAALKAPGFGERKSQYLDDIATLTGGTVIRDELGLTLDKADKEVLGHASKVVLTKDATTIV…	0	0	0	5	0	0	0	4	0
NbS00008911g0002.1 protein AED:0.35 eAED:0.35 QI:460|0.77|0.7|1|1|1|10|229|443; (*GB) gi|327198779|emb|CBL43264.1| (e_value=0.0) glyceraldehyde-3-phosphate dehydrogenase [Solanum tuberosum];; (*SWP) sp|P12859|G3PB_PEA (e_value=0.0) Glyceraldehyde-3-phosphate dehydrogenase B, chloroplastic OS=Pisum sativum GN=GAPB PE=2 SV=2;; (*TAIR) AT1G42970.1 (e_value=0.0) | Symbols: GAPB | glyceraldehyde-3-pho…	MASHAALAPSRVPTSTRLPFKNSHSFPTQCFSEKFEVAEFSGLRSSGCVTFSNKESSFFDVVSAQLTPKTTGSAPVKGETVAKLKVAINAPVKGETVAKLKVAINGFGRIGRNFLRCWHGRKDSPLDVIVVNDSGGVKNASHLLKYDSMLGTFKADVKIVDNETISVDGKHIKGTGVFVDGPGAGKHIQAGAKKVIITAPAKGADIPTYVVGVNEQDYSHEVANIISNASCTTNCLAPFVKVMDEELGIVKGTMTTTHSYTGDQRLLDASHRDLRRARAAALNIVPTSTGAAKAVSLVLPQLKGKLNGIALRVPTPNVSVVDLVVNVEKKGISAEDVNAAFRKAADGPLNGILAVCDVPLVSVDFRCSDVSSTIDSSLTMVMGDDMVKVVAWYDNEWGY…	0	0	0	6	0	0	0	5	0
NbS00043180g0003.1 protein AED:0.10 eAED:0.10 QI:0|1|0.5|1|1|1|4|944|486; (*GB) gi|113461|sp|P27081.1|ADT2_SOLTU (e_value=0.0) RecName: Full=ADP,ATP carrier protein, mitochondrial; AltName: Full=ADP/ATP translocase; AltName: Full=Adenine nucleotide translocator; Short=ANT; Flags: Precursor;; (*SWP) sp|P27081|ADT2_SOLTU (e_value=0.0) ADP,ATP carrier protein, mitochondrial (Fragment) OS=Solanum tub…	LLVLLKSPFPLSTSKASGTQVTITFSLYDISLSVYNMYLDDLKIGDFDRVYLAMADNQHPTVFQKVANQMHLSSSLSQDVHAHYGGIQRPAFHQRRFAYGNYSNAGLQNCQASQDLSLISANASPVFVQAPQEKGLAAFATDFLMGGVSAAVSKTAAAPIERVKLLIQNQDEMIKAGRLSEPYKGIGDCFGRTIKDEGFGSLWRGNTANVIRYFPTQALNFAFKDYFKRLFNFKKDRDGYWKWFAGNLASGGAAGASSLLFVYSLDYARTRLANDAKAAKKGGGRQFNGLVDVYKKTLASAGASSLLFVYSLDYARTRLANDAKAAKKGGGRQFNGLVDVYKKTLASDGIAGLYRGFNISCVGIIVYRGLYFGMYDSLKPVLLTGNMQDSFFASFALGW…	0	0	0	2	0	0	0	2	0
NbS00043181g0003.1 protein AED:0.20 eAED:0.20 QI:0|1|0.5|1|1|1|4|682|483; (*GB) gi|113461|sp|P27081.1|ADT2_SOLTU (e_value=0.0) RecName: Full=ADP,ATP carrier protein, mitochondrial; AltName: Full=ADP/ATP translocase; AltName: Full=Adenine nucleotide translocator; Short=ANT; Flags: Precursor;; (*SWP) sp|P27081|ADT2_SOLTU (e_value=0.0) ADP,ATP carrier protein, mitochondrial (Fragment) OS=Solanum tub…	LLVLLKSPFPLSTSKASGTQVTITFSLYDISLSVYNMYLDDLKIGDFDRVYLAMADNQHPTVFQKVANQMHLSSSLSQDVHAHYGGIQRPAFHQRRFAYGNYSNAGLQNCQASQDLSLISANASPVFVQAPQEKGLAAFATDFLMGGVSAAVSKTAAAPIERVKLLIQNQDEMIKAGRLSEPYKGIGDCFGRTIKDEGFGSLWRGNTANVIRYFPTQALNFAFKDYFKRLFNFKKDRDGYWKWFAGNLASGGAAGASSLLFVYSLDYARTRLANDAKAAKKGGGRQFNGLIDVYKKTLASSSLLFVYSLDYARTRLANDAKAAKKGGGRQFNGLVDVYKKTLASDGIAGLYRGFNISCVGIIVYRGLYFGMYDSLKPVLLTGNMQDSFFASFALGWLIT…	0	0	0	2	0	0	0	2	0
NbS00015734g0205.1 protein	MLGRVPMQPLPCRKSKWVILLIKNGIAGHPGDTSVVVVTNSVSYFSGLLTHFLLTSAGHPRDTSVVVVTLESSEVYIVVSLSSRTDTQVIYVDPTTGNLRYNEKTGYDVFNSQSEALDHVTNGSKWLCKSITYARAVLGYTALGSFGLLLVATKLSASIPNLPGGGCIYTVTESQWIKISLQNPQPLGKGELKNVQEVTELDIDGKHYFCESRDITRPFPSRMPLQNPDDEFVWNKWFSVPFRKIGLPEHCVVLLQVLLRTWYP	0	0	2	1	0	0	0	1	2
NbS00017011g0013.1 protein AED:0.28 eAED:0.28 QI:38|1|0.75|1|1|1|4|381|376; (*GB) gi|255567768|ref|XP_002524862.1| (e_value=0.0) conserved hypothetical protein [Ricinus communis];; (*TAIR) AT3G59770.2 (e_value=5e-159) | Symbols: SAC9 | sacI homology domain-containing protein / WW domain-containing protein | chr3:22079281-22084785 REVERSE LENGTH=1405;; (*ITAG) Solyc08g044400.1.1 (e_value=3e-176) e…	MSLLAPLNSGAQDSFWRAPHSSASVEFVIVLGDLSDVCGVVLLVSPCGYSMTDAPVVQIWASNKIHKEERSCMGKWDMRSLITSSSELCGQERSSEVPRHVKFSFRNPVRCRIIWITLRLQKIGSSSVNFEKDLSLLSLEENPFAEPVRRASFGGTVESDPCLHAKRILVVGSPMRKDVGASTQGSDQINTRNLLDKPPPLNRFKVPIEVERLTDNDLVLEQFLPPVSPMVAGFRLDGFSAIKPRVTHSPPPQQVNPWDVSSCVLEDRFISPAVLYIQVSAFQEPHSMVTIAEHRLPEVKAGTAMYFDFPREISTRRISFRLLGDIAAFTDDPSEQDDSDARVRTVAAGLSLANRIKLYYYADPYELGKWASLSAI	0	0	3	3	0	0	0	1	3
NbS00006303g0103.1 protein AED:0.23 eAED:0.23 QI:297|0.61|0.64|0.92|0.92|0.85|14|423|545 eukaryotic translation initiation factor 2A-like	MAVVEPSPSLDILVREPEGFAIWNGPPFPSGQPGIKLDRVPCTSAKFSEDGSKLMVTKSDSIISIFDCKTLKEIRSFNVPNVLAAVISPYGTYLQTFQKCASPQDKNVVLWKIENGEYVYQLFQKNMTKVTWPSVRFSSDETVACRLATNEIQFFDPRDFSKGFVNRLRVPAIAALELSKAPGSYVAAFVPESKGMPASIQIYACGKDLQSQAVARRSFFRCSTVQLSWNSGSTGLLVVVQSDVDKTNQSYYGESKLNYLTTDGTHEGLVPLRKDGPIHDVQWSYSVMPAMATVFDKKCNPLLELGTGPYNTIRWNPLGNWLVQPASLFPSAVTAFACLNPCSTVICLAGFGNLPGDMAFWDYKEKKQLGTTRAELSVTSEWSPDVVNFSDADVNPPVG…	0	0	10	10	1	0	3	6	8
NbS00011613g0011.1 protein AED:0.31 eAED:0.36 QI:0|0.14|0|0.87|0|0.37|8|0|487; (*GB) gi|359497489|ref|XP_003635537.1| (e_value=4e-104) PREDICTED: LOW QUALITY PROTEIN: heat shock protein STI-like [Vitis vinifera];; (*SWP) sp|Q43468|STIP_SOYBN (e_value=4e-57) Heat shock protein STI OS=Glycine max GN=STI PE=2 SV=1;; (*TAIR) AT1G62740.1 (e_value=7e-97) | Symbols: Hop2 | stress-inducible protein, puta…	MQAAADAKYYGNVEVYNILKARGGQNPGKNTPMTVANPREVPEYELNPLELQSCNACNFTDAITHFTEAIILSPNNHVLYSNRSAAYASIGKYSDALSDAQKTVDLKSDWAKGYSRLGAAHLGLHHYDEAVSAYKKGLEIDPNNEALKSGLSDAQAAQARSRGPASSANPFGDAFSGPEMWAKLTADSSTRAYLNQPDFVNMMKDIQKNPSNLNLYLKDQRVMQALGVLLGVKLSTRMPEEEDAEMPEPSPERKRPAEEEKKRPEPEPEPESMEVGEEEKEIKERKAKAQKEKEAGNAAYKKKDFETAIQHYSKAIELDDDDISFITNRAAVYLEMGKLSLFILYAEVRHPNVVQFVGAVAQNIPMMIVLEYHPSGDLGSYLQKKGRLSASKVLRFALD…	0	0	10	7	0	0	2	3	2
NbS00001594g0015.1 protein AED:0.04 eAED:0.04 QI:64|0.5|0.6|1|0.75|0.6|5|0|553; (*GB) gi|268619136|gb|ACZ13344.1| (e_value=0.0) tubulin alpha chain [Bursaphelenchus xylophilus];; (*SWP) sp|Q9ZRR5|TBA3_HORVU (e_value=0.0) Tubulin alpha-3 chain OS=Hordeum vulgare GN=TUBA3 PE=2 SV=1;; (*TAIR) AT4G14960.1 (e_value=0.0) | Symbols: TUA6 | Tubulin/FtsZ family protein | chr4:8548753-8550319 REVERSE LENGT…	MRECISIHIGQAGIQVGNACWELYCLEHGIQPDGQMPGDKTVGGGDDAFNTFFSETGAGKHVPRAVFVDLEPTVIDEVRTGTYRQLFHPEQLISGKEDAANNFARGHYTIGKEIVDLCLDRIRKLADNCTGLQGFLVFNAVGGGTGSGLGSLLLERLSVDYGKKSKLGFTIYPSPQVSTSVVEPYNSVLSTHSLLEHTDVAVLLDNEAIYDICRRSLDIERPTYTNLNRLISQVISSLTASLRFDGALNVDVNEFQTNLVPYPRIHFMLSSYAPVISCRRSLDIERPTYTNLNRLISQVISSLTASLRFDGALNVDVNEFQTNLVPYPRIHFMLSSYAPVISAEKAYHEQLSVAEITNSAFEPSSMMVKCDPRHGKYMACCLMFRGDVVPKDVNAAVAT…	0	1	4	3	2	0	1	3	0
NbS00006458g0003.1 protein AED:0.07 eAED:0.07 QI:12|0.33|0.25|1|0.66|0.5|4|0|500; (*GB) gi|17402471|emb|CAD13178.1| (e_value=0.0) alpha-tubulin [Nicotiana tabacum];; (*SWP) sp|P33629|TBA_PRUDU (e_value=0.0) Tubulin alpha chain OS=Prunus dulcis GN=TUBA PE=2 SV=1;; (*TAIR) AT4G14960.2 (e_value=0.0) | Symbols: TUA6 | Tubulin/FtsZ family protein | chr4:8548769-8550319 REVERSE LENGTH=450;; (*ITAG) Sol…	MRECISIHIGQAGIQVGNACWELYCLEHGIQPDGQMPGDKIVGGACWELYCLEHGIQMPGDKTVGGGDDAFNTFFSETGAGKHVPRAVFVDLEPTVIDEVRTGTYRQLFHPEQLISGKEDAANNFARGHYTIGKEIVDLSLDRIRKLAVTLPVVTIPVIGKEIVDLCLDRIRKLADNCTGLQGFLVFNAVGGGTGSGLGSLLLERLSVDYGKKSKLGFTIYPSPQVSTSVVEPYNSVLSTHSLLEHTDVSILLDNEAIYDICRRSLDIERPTYTNLNRLISQVISSLTASLRFDGALNVDVNEFQTNLVPYPRIHFMLSSYAPVISAEKAYHEQLSVAEITNSAFEPSSMMVKCDPRHGKYMACCLMFRGDVVPKDVNAAVATIKTKRTIQFVDWCPTG…	0	1	4	3	2	0	1	3	0
NbS00027305g0008.1 protein AED:0.31 eAED:0.31 QI:0|1|0.5|1|1|1|2|0|284; (*GB) gi|110377766|gb|ABG73415.1| (e_value=0.0) chloroplast pigment-binding protein CP29 [Nicotiana tabacum];; (*SWP) sp|Q9XF88|CB4B_ARATH (e_value=4e-168) Chlorophyll a-b binding protein CP29.2, chloroplastic OS=Arabidopsis thaliana GN=LHCB4.2 PE=1 SV=1;; (*TAIR) AT3G08940.2 (e_value=3e-169) | Symbols: LHCB4.2 | light harves…	MATAAATSSFIGTRLPEIHSGSGRVQARFGFGKKAALKKASKKQIPDRPLWYPGAKAPEYLDGSLVGDYGFDPFGLGKPAEYLQFDLDSLDQNLAKNLAGDIIGTRTELADVKSTPFQPYSEVFGLQRFRECELIHGRWAMLATLGALTVEWLTGITWQDAGKVELVEGSSYLGQPLPFSITTLIWVEVLVIGYIEFQRNAELDPEKRLYPGGSFFDPLGLAADPEKKATLQLAEIKHARLAMVAFLGFAVQAAATGKGPLNNWATHLSDPLHTTIFDTFGFFS	0	1	4	1	3	0	1	2	0
NbS00014416g0001.1 protein AED:0.29 eAED:0.31 QI:63|0|0.5|1|0|1|2|0|399; (*GB) gi|115361537|gb|ABI95859.1| (e_value=0.0) S-adenosyl-L-methionine synthase [Nicotiana suaveolens];; (*SWP) sp|P43282|METK3_SOLLC (e_value=0.0) S-adenosylmethionine synthase 3 OS=Solanum lycopersicum GN=SAM3 PE=2 SV=1;; (*TAIR) AT2G36880.2 (e_value=0.0) | Symbols: MAT3 | methionine adenosyltransferase 3 | chr2:15479721-…	MLLNLIRADMETFLFTSESVNEGHPDKLCDQVSDAILDACLEQDPESKVACETCTKTNMVMVFGEITTKATVDYEKIVRDTCRGIGFTSADVGLDADNCKVLVNIEQQSPDIAQGVHGHLTKKPEEIGAGDQGHMFGYATDETPELMPLTHVLATKLGAKLTEVRKNKTCPWLRPDGKTQVTVEYKNDNGAMVPIRVHTVLISTQHDETVTNDQIAKDLKEHVIKPVIPAQYLDEKTIFHLNPSGRFVIGGPHGDAGLTGRKIIIDTYGGWGAHGGGAFSGKDPTKVDRSGAYIVRQAAKSVVASGLARRCIVQVSYAIGVAEPLSVFVDTYKTGTIPDKDILALIKENFDFRPGMMSINLDLLRGGNFRYQKTAAYGHFGRDDPDFTWETVKVLKPKA	0	1	1	2	3	0	1	2	0
NbS00025223g0018.1 protein AED:0.09 eAED:0.10 QI:0|0|0|0.6|0.75|0.6|5|0|591; (*GB) gi|108864706|gb|ABG22609.1| (e_value=0.0) Heat shock cognate 70 kDa protein, putative, expressed [Oryza sativa Japonica Group];; (*SWP) sp|P27322|HSP72_SOLLC (e_value=0.0) Heat shock cognate 70 kDa protein 2 OS=Solanum lycopersicum GN=HSC-2 PE=2 SV=1;; (*TAIR) AT5G02500.1 (e_value=0.0) | Symbols: HSC70-1, HSP70-1, …	MMLGGDSVTALEGALLDVIETIIVNRQATKDAGVISGLNVMRIINEPTAAAIAYGLDKKATSVGEKNVLIFDLGGGTFDVSLLTIEEATAGDTHLGGEDFENRLVNHFVQEFKRKSKKDITGNTRALRRSRTACERAKRTLSSTAQTTIEIDSLYEGIDFYSIQLRKVKATAGDTHLGGEDFDNRLVNHFVQEFKRKSKKDITGNPRALRRLRTACERAKRTLSSTAQTTIEIDSLYEGIDFYSTITRARFEELNMDLFRKCMEPVEKCLRDAKMDKSTVHDVVLVGGSTRIPKVQQLLQDFFNGKELCKSINPDEAVAYGAAVQAAILSGEGNEKVQDLLLLDVTPLSLGLETAGGVMTVLIPRNTTIPTKKEQVFSTYSDNQPGVLIQVYEGERTRT…	0	1	3	0	2	0	2	1	2
NbS00019305g0027.1 protein AED:0.37 eAED:0.37 QI:0|1|0.88|1|1|1|9|0|556; (*GB) gi|3676296|gb|AAD03392.1| (e_value=0.0) mitochondrial ATPase beta subunit [Nicotiana sylvestris];; (*SWP) sp|P17614|ATPBM_NICPL (e_value=0.0) ATP synthase subunit beta, mitochondrial OS=Nicotiana plumbaginifolia GN=ATPB PE=1 SV=1;; (*TAIR) AT5G08680.1 (e_value=0.0) | Symbols: | ATP synthase alpha/beta family protein | …	MSSRRLLASLLRSTAQRGGAISRSPLANSIPRTTSRASPKGFLLNRAVKYATSAAAEKPKATPPKPSGNEPTGKITDEFTGAGSIGKVCQVIGAVVDVRFDEGLPPILTALEVLDNQIRLVLEVAQHLGENMVRTIAMDGTEGLVRGQRVLNTGSPITVPVGRATLGRIINVIGEPIDERGDINTDHFLPIHREAPAFVEQATEQQILVTGIKVVDLLAPYQRGGKIGLFGGAGVGKTVLIMELINNVAKAHGGFSVFAGVGERTREGNDLYREMIESGVIKLGDKQSESKCALVYGQMNEPPGARARVGLTGLTVAEHFRDAEGQDVLLFIDNIFRFTQANSEVSALLGRIPSAVGYQPTLATDLGGLQERITTTKKGSITSVQAIYVPADDLTDPAP…	0	1	2	0	2	0	2	0	0
NbS00020973g0010.1 protein AED:0.23 eAED:0.23 QI:0|0.87|0.77|1|0.87|1|9|0|545; (*GB) gi|3676296|gb|AAD03392.1| (e_value=0.0) mitochondrial ATPase beta subunit [Nicotiana sylvestris];; (*SWP) sp|P17614|ATPBM_NICPL (e_value=0.0) ATP synthase subunit beta, mitochondrial OS=Nicotiana plumbaginifolia GN=ATPB PE=1 SV=1;; (*TAIR) AT5G08680.1 (e_value=0.0) | Symbols: | ATP synthase alpha/beta family prot…	MSSRRFLASLLRSTAQRGGAISRSPLANSIPRTTSRASSKGFLLNRAVKYATSAASEKPKATPPKPSGNEPTGKITDEFTGAGSIGKVCQVIGAVVDVRFDVGLPPILTALEVLDNQIRLVLEVAQHLGENMVRTIAMDGTEGLVRGQRVLNTGSPITVPVGRATLGRIINVIGEPIDERGDITPAFVEQATEQQILVTGIKVVDLLAPYQRGGKIGLFGGAGVGKTVLIMELINNVAKAHGGFSVFAGVGERTREGNDLYREMIESGVIKLGDKQSESKCALVYGQMNEPPGARARVGLTGLTVAEHFRDAEGQDVLLFIDNIFRFTQANSEVSALLGRIPSAVGYQPTLATDLGGLQERITTTKKGSITSVQAIYVPADDLTDPAPATTFAHLDATT…	0	1	2	0	2	0	2	0	0
NbS00004414g0010.1 protein AED:0.00 eAED:0.00 QI:149|1|1|1|1|1|2|350|235	MNFLSSLAKSAGGQSADEPKKTAGEEASTADLFSSAKVLAEAAQSQFNKDSGNVDNKKVAAAAADVLDAAQKYGKLDETQGVGQYIEKAETYLHQYGSANPSTTTDAAAAKAPAATPDTKDTKAPTPAPAAADTDETKAPAPAPAAADTEETKASAPAPAAADTEETKAPATADTEEPPAPAPAPAPAPEEKGEGYGQYVKMAEGFLKSGDDESAKASEGGSDYLKMAGDFLGKK	0	1	13	9	2	2	3	0	1
NbS00036430g0009.1 protein AED:0.35 eAED:0.35 QI:0|0|0|1|0|0|4|0|448; (*GB) gi|113170490|ref|YP_717281.1| (e_value=2e-170) Atp1 [Ostreococcus tauri];; (*SWP) sp|B3PQ70|ATPA_RHIE6 (e_value=2e-158) ATP synthase subunit alpha OS=Rhizobium etli (strain CIAT 652) GN=atpA PE=3 SV=1;; (*ITAG) ATMG01190.1 (e_value=2e-149) | Symbols: ATP1 | ATP synthase subunit 1 | chrM:302166-303689 REVERSE LENGTH=507;; …	MELSPRAAELTSLLESRISNFYTNFQVDEIGRVVSVGDGIARVYGLNEIQAGEMVEFGSGVKGITLNLENENVGIVFYGSDTAIKEGDLVKRTGSNVDVPAGKAMLGRVVDVLGVPIDGTGALSDHERRRVEVKAPGIIERKSVHEPMQTGLKAVDSLVPIGRATVSDPAPLQFLDPYSGCAMGEYFRNNGMHTLIIYDYLSKYSVAYQQISLLLRRLLGREAFPGDVFYLHSHLLERAAKRSDQTGAGSLTALPVIETQAGDVSAYIPTNTGAGSLTALPVIETQAGDVSADIPTNLFYRGIRPAINVGLSVSRVGSAALLKTMKQVCSSSKLELAQYREVATLGQFRSDLDTATQALLNRGARLTEVPKQPQYAPLPIEKQILVIYAAVNGICDGMP…	0	1	2	2	2	0	3	2	0
NbS00037135g0011.1 protein AED:0.29 eAED:0.30 QI:0|0.86|0.83|1|0.60|0.54|24|465|954; (*SWP) sp|P93025|PHOT2_ARATH (e_value=0.0) Phototropin-2 OS=Arabidopsis thaliana GN=PHOT2 PE=1 SV=2;; (*TAIR) AT5G58140.1 (e_value=0.0) | Symbols: PHOT2, NPL1 | phototropin 2 | chr5:23524771-23529993 FORWARD LENGTH=915;; (*ITAG) Solyc01g097770.2.1 (e_value=0.0) genomic_reference:SL2.40ch01 gene_region:80240073-80…	MDSSSSGNKDQRRSLDVFDPTLTREGGKSASSRNEGIDVQEISMKGVESANMPGTNKPMNKWMPFDPNGKKGEDSDNANSQIPSENSIAARAAEWGLTVRTDVGEGSFHTISRSGENSFADGERGKNSLEKYSVGSTRTSEESYEDTKFPRVSQELKDALATLQQTFVVSDATKPDCPIVYASSGFFTMTGDYWKELGKDTDQKEVEKIREAVKTGKSYCGRLLNYKKNGTPFWNLLTVTPIKDDTGKTIKFIGMQVEVSKYTEGINEKALRPNGLPKSLIRYDARQKEKALGSITEVVQTVKNPRSHMKSASQDASSRTDKEKLQLDFMLPKSAETESMKTPGRYTPQGETTSDMSVQDSDKKSRKSARVSLKGFKGRSSSISAPLETEQNIGPEILM…	0	0	3	0	6	0	2	3	0
NbS00022217g0004.1 protein AED:0.21 eAED:0.21 QI:283|0.93|1|1|0.93|0.88|17|503|702; (*GB) gi|350535937|ref|NP_001234477.1| (e_value=0.0) plasma membrane H+-ATPase [Solanum lycopersicum];; (*SWP) sp|P23980|PMA2_SOLLC (e_value=0.0) Plasma membrane ATPase 2 (Fragment) OS=Solanum lycopersicum GN=LHA2 PE=3 SV=1;; (*TAIR) AT5G62670.1 (e_value=0.0) | Symbols: AHA11, HA11 | H(+)-ATPase 11 | chr5:25159495…	MGEKPEVLDAVLKETVDLENIPIEEVFENLRCTKEGLSGPAAQERLAIFGYNKLEEKKESKFLKFLGFMWNPLSWVMEAAAVMAIALANGGGKPPDWQDFVGIITLLVINSTISFIEENNAGNAAAALMARLAPKAKARAGIREIHFLPFNPTDKRTALTYLDGEGKMHRVSKGAPEQILNLAHNKSDIERRVHAVIDKFAERGLRSLGVAYQEVPEGRKESTGGPWQFIGLLPLFDPPRHDSAETIRRALNLGVNVKMITGDQLAIGKETGRRLGMGTNMYPSSALLGQTKDESIASLPIDELIEKADGFAGVFPEHKYEIVKRLQARKHLCGMTGDGVNDAPALKKADIGIAVDDATDAARSASDIVLTEPGLSVIISAVLTSRAIFQRMKNYTIYA…	0	0	2	4	19	1	0	3	1
NbS00027850g0005.1 protein AED:0.06 eAED:0.06 QI:0|-1|0|1|-1|1|1|0|885; (*GB) gi|255539306|ref|XP_002510718.1| (e_value=0.0) conserved hypothetical protein [Ricinus communis];; (*TAIR) AT1G42550.1 (e_value=0.0) | Symbols: PMI1 | plastid movement impaired1 | chr1:15977131-15979734 FORWARD LENGTH=843;; (*ITAG) Solyc10g006330.2.1 (e_value=0.0) genomic_reference:SL2.40ch10 gene_region:965024-971538 t…	MADYIANTRRNSNTQLLQELEALSETLYQPNTSSTSTTRRTASLVLPRTSVPPIAIADDPITSAKNDDSVINPKPRSRRMSLSPWRSRPKLDIESEDNTIQQSSSSTKSLKKLDNKVESNSEKKGLWNWKPIRALAHIGKQKLSCLFSVEVVTVQGLPTSMNGLRLSVCVRKKEIKEGAVQTMPSRVSQGAADFEETLFIRCHVYYTPATTGSNGTRFKFEPRPFSIYVFAVDAEELDFGKNSVDLSEMIQESIEKSFEGNRIRQWDTSYTLLGKAKGGELVLKLGFQIMEKDGGIGIYSQAEGQKTGKNANYSLSSSSSFARKQSKTSFSVPSPRMTSLSSYNWTPSQTGTTPNLQGIDELNLDAEPEKEPESKAEDLDLLEFDFVDKGVEIQDKDEA…	0	0	4	1	15	15	2	3	2
NbS00006964g0008.1 protein AED:0.23 eAED:0.23 QI:394|0.87|1|1|0.93|0.88|17|339|721; (*GB) gi|255552828|ref|XP_002517457.1| (e_value=0.0) H(\+)-transporting atpase plant/fungi plasma membrane type, putative [Ricinus communis];; (*SWP) sp|P23980|PMA2_SOLLC (e_value=0.0) Plasma membrane ATPase 2 (Fragment) OS=Solanum lycopersicum GN=LHA2 PE=3 SV=1;; (*TAIR) AT5G62670.1 (e_value=0.0) | Symbols: AHA11…	MGEKPEVLDAVLKETVDLENIPIEEVFENLRCTKEGLTGPAAQERLAIFGYNKLEEKKESKFLKFLGFMWNPLSWVMEAAAIMAIALANGGGKPPDWQDFVGIITLLVINSTISFIEENNAGNAAAALMARLAPKAKSALTGESLPVTKGPGDGVYSGSTCKQGEIEAVVIATGVHTFFGKAAHLVDSTNQVGHFQKILNLAHNKSDIERRVHAVIDKFAERGLRSLGVAYQEVPEGRKESTGGPWQFIGLLPLFDPPRHDSAETIRRALNLGVNVKMITGDQLAIGKETGRRLGMGTNMYPSSALLGQTKDESIASLPIDELIEKADGFAGVFPEHKYEIVKRLQARKHLCGMTGDGVNDAPALKKADIGIAVDDATDAARSASDIVLTEPGLSVIIS…	0	0	0	0	2	15	0	0	1
NbS00011891g0002.1 protein AED:0.34 eAED:0.35 QI:15|0.33|0.2|0.9|1|1|10|0|403; (*GB) gi|225432169|ref|XP_002267688.1| (e_value=3e-131) PREDICTED: novel plant SNARE 13 [Vitis vinifera];; (*SWP) sp|Q9LNH6|NPS12_ARATH (e_value=7e-106) Novel plant SNARE 12 OS=Arabidopsis thaliana GN=NPSN12 PE=2 SV=1;; (*TAIR) AT1G48240.1 (e_value=5e-107) | Symbols: ATNPSN12, NPSN12 | novel plant snare 12 | chr1:17809…	MANLDLQMNPQMEQIHGEIRDNFRALANGFQKLDKIKDSNRQSKQLEELTGKMRECKRLIKEFDREIKDEESRNPPEISKQLNDEKQSMDSNRQSKQLEELTGKMRECKRLIKEFDPEIKDEESRNPPEINKQLNDEKQLMIKELNSYVALRKTYMSSLGNKRVELFDMGGASEPTAEENVQMASAMSNQELISAGNKTMDETDQAIERSKQVVHQTIEVGTQTATTLKGQVRMGGASEPTSEENVQIASAMSNRELISAGNKTMDETDQAIERSKQVVHQTIEVGTQTATTLKGQTDQMGRVVNELDTIQFSIKKASQLVKEIGRQVATDKCIMLFLFLIVCGVVAIIVVKIVNPHNKDIRDIPGLAPPAPSRRLLYLKSGQDFIFKGPLGYSLNWGR…	0	0	0	0	2	2	0	0	0
NbS00051889g0006.1 protein AED:0.08 eAED:0.09 QI:0|0.8|0.33|1|0.6|0.66|6|0|622; (*GB) gi|225434311|ref|XP_002264896.1| (e_value=0.0) PREDICTED: root phototropism protein 2 [Vitis vinifera];; (*SWP) sp|Q682S0|RPT2_ARATH (e_value=0.0) Root phototropism protein 2 OS=Arabidopsis thaliana GN=RPT2 PE=1 SV=2;; (*TAIR) AT2G30520.1 (e_value=0.0) | Symbols: RPT2 | Phototropic-responsive NPH3 family protein…	MAVPIKNTNRLSLAMERTGQWVFSQEIPTDVVVEVGEANFNLHKFMLVAKSNYIRKLILESKETEVTRINLSEIPGGPEILILESKETEVTRINLSEIPGGPEMFEKSAKFCYGVNFEITVHNVAALRCAAEYLQMTDKYCDNNLASRTEDFLTQVALTSLSGALVVLKSCENLLPLAEELNIVQRCVEIASAKACVEANFPSRSPPNWWTEELTILDITVEANFPSRSPPNWWTEEFTILDITFFERIIISMKTRGAKALTAASAIITYTERSLRDLVRDHSGNGTRLVEPEDSDIRMHQRQLLESIVKLLPSDKAAFPINFLCCLLRTAIFLRAANSCKNELEKRISAILEHVTVDDLLVLSFTYDGERLFDLESVRRIISGFMEKEKTVAVFNGGD…	0	0	0	1	4	7	0	0	0
NbS00000055g0003.1 protein AED:0.19 eAED:0.21 QI:0|-1|0|1|-1|1|1|0|643; (*TAIR) AT1G42550.1 (e_value=0.0) | Symbols: PMI1 | plastid movement impaired1 | chr1:15977131-15979734 FORWARD LENGTH=843;; (*ITAG) Solyc10g006330.2.1 (e_value=0.0) genomic_reference:SL2.40ch10 gene_region:965024-971538 transcript_region:SL2.40ch10:965024..971538+ functional_description:"Unknown Protein (AHRD V1)";	MADYITNTRRNSNTQLLQELEALSETLNQPNTSSTSTTRRTASLVLPRTSVPPIATADDPIISAKNDDTVINPKPRSRRMSLSPWRSRPKLDIESEDNTIQQSSSSTKSLKKLDSKAESNSEKKGLWNWKPIRALAHIGKQKLSCLFSVEVVTVQGLPTSMNGLRLSVCVRKKETKEGAVQTMPSRVSQGAADFEETLFIRCHVYYTPATTTGSSGSRFKFEPRPFSIYVFAVDAEELDFGKNLVDLSEMIQESIEKSFEGNRIRQWDTTYTLLGKAKGGELVLKLGFQIMEKDGGIGIYSQAEGQKTGKNANYSSSSSSSFARKQSKTSFSVPSPRMTSLSSSNWIPSQTGATPNLQGIDELNLDAEPEKEPESKAEDLDLPEFDVVDKGVEIQDKDE…	0	0	0	0	8	4	0	1	1
NbS00045514g0003.1 protein AED:0.21 eAED:0.21 QI:0|0|0|0.33|1|1|3|0|117; (*GB) gi|388513069|gb|AFK44596.1| (e_value=4e-44) unknown [Lotus japonicus];; (*TAIR) AT5G09960.1 (e_value=6e-43) | Symbols: | FUNCTIONS IN: molecular_function unknown; INVOLVED IN: biological_process unknown; LOCATED IN: plasma membrane; EXPRESSED IN: 22 plant structures; EXPRESSED DURING: 13 growth stages; CONTAINS InterPr…	MAKEKASERCKNRVKPNGISKTAPWLSVPQFGDWDQKGVMPDYSMDFSKIRENRKQNKRDLSRASLGNEEELISSTNKNANTGHHHSAHSDDLHYHQNHSPTTRRSIFSYFNCCVKA	0	0	0	0	2	2	0	0	0
NbS00003596g0009.1 protein AED:0.20 eAED:0.20 QI:618|0.91|0.92|1|0.75|0.68|25|119|960; (*GB) gi|255582071|ref|XP_002531832.1| (e_value=0.0) serine/threonine protein kinase, putative [Ricinus communis];; (*SWP) sp|Q2RBR1|PHT1B_ORYSJ (e_value=0.0) Phototropin-1B OS=Oryza sativa subsp. japonica GN=PHOT1B PE=1 SV=2;; (*TAIR) AT5G58140.1 (e_value=0.0) | Symbols: PHOT2, NPL1 | phototropin 2 | chr5:2352…	MEKQQNKQSPPLIPPLPRDPRGSLEVFNPSTYSISRPKNPVFRLSQPSWNNNWAEPELEPIKRSSSIPETEEESEPIVSNNNDIKEETIATSWMAIKDPIIITPISTSQLSSPITQTAVSPAAAASVDENGAAAQRAAEWGLVLKTDDETGKLKGVKVRNSGDDPNGKAENSRRNSGNSIRSSGEFSDDGAGKERGFPRVSEDLRDALSTFQQTFVVSDAIKPDYPILYASAGFFKMTGYTSKEVIGRNWKITIYDKFCWFYCWVGSSRFMQGSDTDPEDVAKIREALQSGSAYCGRLLNYKKDGTPFWNLLTIAPIKDDNGKVLKFIGMQVEVSKHTEGAKDKMVRPNGLPESLIRYDARQKEMASNSVTELLEVMKKPRARALSESTNRPLLRKSGG…	0	0	0	0	1	5	0	0	1
NbS00000522g0013.1 protein AED:0.21 eAED:0.21 QI:283|0.94|1|1|0.76|0.94|18|53|673; (*GB) gi|193290710|gb|ACF17663.1| (e_value=0.0) putative long-chain acyl-CoA synthetase [Capsicum annuum];; (*SWP) sp|Q9T0A0|LACS4_ARATH (e_value=0.0) Long chain acyl-CoA synthetase 4 OS=Arabidopsis thaliana GN=LACS4 PE=2 SV=1;; (*TAIR) AT4G23850.1 (e_value=0.0) | Symbols: LACS4 | AMP-dependent synthetase and ligas…	MAQEKFIVEVEPAKPSQNGKPSMGAVYRSLFAKDGFPPPIPGLDSCWDIFRLSVEKYPNNRMLGRREIVDGKPGKYVWMSYKEVYDIVIKLGNSIRSCGVDEGDKCGIYGANCPEWIMSMEACNAHGLYCVPLYDTLGAGAVEFIINHAEVKIAFVEEKKLPELLKTFPNAAKYLKTVVSFGNVTPQQKEEVENCGVTLYSWDEFLQLGSEKQFDLPVKKKEDICTIMYTSGTTGDPKGVLISNNSIVTLIAGVQRLLGSVNESDVKLLTEDIGELKPTIFCAVPRVLDRIYSGLQQKISSGGLLKSTLFNLAYAYKHHNLKKGRKHFEASPLSDKVVFSKVKEGLGGKVRLILSGAAPLAAHVEAFLRVVACCHVLQGYGLTETCAGTFVSLPNQYAM…	0	0	0	0	0	3	0	0	0
NbS00003383g0024.1 protein AED:0.28 eAED:0.28 QI:15|0.9|0.72|1|0.9|0.72|11|0|293; (*GB) gi|388506856|gb|AFK41494.1| (e_value=2e-158) unknown [Lotus japonicus];; (*SWP) sp|Q9LRP1|NPS13_ARATH (e_value=1e-151) Novel plant SNARE 13 OS=Arabidopsis thaliana GN=NPSN13 PE=1 SV=1;; (*TAIR) AT3G17440.1 (e_value=1e-152) | Symbols: NPSN13, ATNPSN13 | novel plant snare 13 | chr3:5969909-5972290 REVERSE LENGTH…	MANLDLQMNPQMEQIHGEIRDNFRALANGFQKLDKIKDSNRQSKQLEELTGKMRECKRLIKEFDREIKDEESRNLPEISKQLNDEKQSMIKELNSYVALRKTYMSSLGNKRVELFDMGSASEPTAEENVQMASAMSNQELISAGNKTMDETDQAIERSKQVVHQTIEVGTQTATTLKGQTDQMGRVVNELDTIQFSIKKASQLVKEIGRQVATDKCIMLFLFLIVCGVVAIIVVKVATDKCIMLFLFLIVCGVVAIIVVKIVNPHNKDIRDIPGLAPPAPSRRLLYLKSGQDF	0	0	0	0	2	0	0	0	0
NbS00013351g0004.1 protein AED:0.21 eAED:0.22 QI:12|1|0.88|1|0.82|0.83|18|0|652; (*GB) gi|350535803|ref|NP_001234214.1| (e_value=0.0) phototropin-1 [Solanum lycopersicum];; (*SWP) sp|O48963|PHOT1_ARATH (e_value=0.0) Phototropin-1 OS=Arabidopsis thaliana GN=PHOT1 PE=1 SV=1;; (*TAIR) AT3G45780.2 (e_value=0.0) | Symbols: PHOT1, NPH1, JK224, RPT1 | phototropin 1 | chr3:16818557-16823960 FORWARD LENGT…	MASNSVTELLEVMKKPRARAFSESTNRPLLRKSEGGGTEQNRQDIMGISNKLNLQNKAPARRHSHAGTRTTTMQMEKINEIPDKKPKKPSRLSFIGIKKKGRSSTTTADDDFEARMTMDNDDDYDDDDESDNDGRPDSVDDKVRKKEMRKGIDLATTLERIEKNFVITDPRLPDNPIIFASDSFLELTEYSREEILGRNCRFLQGPETDPATVKKIRQAIDNQTDVTVQLINYTKTGKKFWNLFHLQPMRDQKGEVQYFIGVQLDGSQHVEPLHNSIPEDKATESAKLVKETAENVDDAVRELPDANSKPEDLWRNHSKVVHAKPHRKDSPSWQAIQKVLDSGEPIGLKHFKPIKPLGSGDTGSVHLVELCGTGQCFAMKAMDKSIMLNRNKVHRACAE…	0	0	0	0	2	1	0	0	0
NbS00010832g0008.1 protein AED:0.10 eAED:0.10 QI:0|0|0|1|0.5|0.33|3|0|1012; (*GB) gi|255575610|ref|XP_002528705.1| (e_value=0.0) kinase, putative [Ricinus communis];; (*SWP) sp|Q9SCZ4|FERON_ARATH (e_value=0.0) Receptor-like protein kinase FERONIA OS=Arabidopsis thaliana GN=FER PE=1 SV=1;; (*TAIR) AT3G51550.1 (e_value=0.0) | Symbols: FER | Malectin/receptor-like protein kinase family protein | chr…	MTEGSKFCFLLASTFLLLAVVVKVTLAQNSATGDDILLNCGGPDGLKDADGRKWGSDIGSTYLKGSKSSISDAADQKPSVPQVPFMSARVFQSEFTYSFPVAPGRKFVRLYFYPSSYNKLNATNAIFSVTVGPYSLLRNFSAAQTAEALNYDYLTKEFEDVPSETLNMTFTPSPNTSNSFAFVNGIEIISHRDIYNTEDGTTSIVGQTAAFIIDNSTALENVYRLNVGGNVISPSADTGMFRSWSDDSQYIFGAANGVTDTADDENVTVSYPEGTPSDIAPLDVYKTARSMGPTAQINLQFNLTWVFSVDSGFSYLVRLHFCEITMNITKVNQRVFAIYMNNQTAEPAADVIAWAGSNGVPFHKDYVVSVRSGAPQQDLWLALHPNVASKSNWYDAILN…	0	0	0	0	2	0	0	0	1
NbS00011216g0113.1 protein AED:0.12 eAED:0.13 QI:20|0|0|1|0.5|0.33|3|0|972	MTEGSKFCFLLAFTFLWLAVVVKVTLAQNSAPGDDILLNCGGPDGLKDADGRKWGSDIGSTYLKGSKSSTSDAADQKPSVPQVPFMSARVFQSEFTYSFPVAPGRKFVRLYFYPSSYNKLNATNAIFSVTVGPYSLLRNFSAAQTAEALNYDYLTKEFSINVPSETLNMTFTPSPNTSNSFAFVNGIEIISHRDIYNTEDGTTFIIISHRDIYNTEDGTTSIVGQTAAFIIDNSTALENVYRLNVGGNVISPSADTGMFRSWSDDSQYIFGAANGVTDTADDENVTVSYPEGTPSDIAPLDVYKTARSMGPTAQINLQYNLTWVFSVDSGFSYLVRLHFCEITMNITKVNQRVFAIYMNNQTAEPAADVIAWAGSNGVPFHKDYVVSVRSGAPQQDLWL…	0	0	0	0	2	0	0	0	1
NbS00015470g0013.1 protein AED:0.25 eAED:0.25 QI:153|1|1|1|0.71|0.75|8|256|216; (*GB) gi|18447913|dbj|BAB84322.1| (e_value=7e-130) ras-related protein RAB8-1 [Nicotiana tabacum];; (*SWP) sp|O24466|RAE1A_ARATH (e_value=3e-121) Ras-related protein RABE1a OS=Arabidopsis thaliana GN=RABE1A PE=1 SV=1;; (*TAIR) AT3G53610.3 (e_value=3e-122) | Symbols: ATRAB8, RAB8 | RAB GTPase homolog 8 | chr3:19876531-…	MAAPPARARADYDYLIKLLLIGDSGVGKSCLLLRFSDGSFTTSFITTIGIDFKIRTIELDSKRIKLQIWDTAGQERFRTITTAYYRGAMGILLVYDVTDESSFNNIRNWIRNIEQHASDNVNKILVGNKADMDESKRAVPTSKGQALADEYGIKFFETSAKTNMNVEEVFFSIARDIKQRLAESDNRAEPQTIRINQPDQGAGGAQTAQKSACCGS	0	0	0	0	2	0	0	0	0
NbS00018037g0005.1 protein AED:0.38 eAED:0.41 QI:47|0.62|0.66|0.88|0.87|0.88|9|250|194; (*GB) gi|18447917|dbj|BAB84324.1| (e_value=1e-108) ras-related protein RAB8-3 [Nicotiana tabacum];; (*SWP) sp|O24466|RAE1A_ARATH (e_value=4e-103) Ras-related protein RABE1a OS=Arabidopsis thaliana GN=RABE1A PE=1 SV=1;; (*TAIR) AT5G59840.1 (e_value=1e-104) | Symbols: | Ras-related small GTP-binding family prote…	MAPSRPVLLQLLGNRLLTLKDAHSTQSIDFKIRTIEFDSKRIKLQIWDTAGQERFRTITTAYYRGAMGILLVYDVTDESSFNNIRNWIRNIEQHASDNVNKILVGNKADMDESKRAVPTSKGQALADEYGIKFFETSAKTNMNVEEVFFSIARDIKQRLAESDSKAEPQTIRINQPDQAAGAGQSAQKSACCGS	0	0	0	0	2	0	0	0	0
NbS00031627g0001.1 protein AED:0.48 eAED:0.48 QI:0|1|0.5|1|1|1|2|0|254; (*GB) gi|224139494|ref|XP_002323139.1| (e_value=8e-136) predicted protein [Populus trichocarpa];; (*SWP) sp|Q9FGK5|RAA5A_ARATH (e_value=5e-132) Ras-related protein RABA5a OS=Arabidopsis thaliana GN=RABA5A PE=2 SV=1;; (*TAIR) AT5G47520.1 (e_value=4e-133) | Symbols: AtRABA5a, RABA5a | RAB GTPase homolog A5A | chr5:19277596-1927…	MAFRSEEAQTEDYLFKIVLIGDSAVGKSNLLARFARDEFYPNSKSTIGVEFQTQKLDINGKEVKAQIWDTAGQERFRAVTSAYYRGAVGALLVYDISRRQTFDNISRWLNELQTHSDMNVVTILVGNKSDLKDAREVTTAEGKSLAEAQGLFFIETSALDSSNVAVAFQTVVKEIYNILSRKVIQSQELQKKDSGRLANGKTVVLQADENQDANGQAKKGKDSGRLANGKTVVLQADENQDANGQAKKGWCCSS	0	0	0	0	2	0	0	0	0
NbS00048456g0007.1 protein AED:0.31 eAED:0.31 QI:104|1|1|1|0.75|0.66|9|0|216; (*GB) gi|18447915|dbj|BAB84323.1| (e_value=1e-128) ras-related protein RAB8-2 [Nicotiana tabacum];; (*SWP) sp|P28186|RAE1C_ARATH (e_value=7e-121) Ras-related protein RABE1c OS=Arabidopsis thaliana GN=RABE1C PE=1 SV=1;; (*TAIR) AT3G46060.3 (e_value=5e-122) | Symbols: ARA3 | RAB GTPase homolog 8A | chr3:16917908-16919740 …	MAAPPARARADYDYLIKLLLIGDSGVGKSCLLLRFSDGSFTTSFITTIGIDFKIRTIELDGKRIKLQIWDTAGQERFRTITTAYYRGAMGILLVYDVTDESSFNNIRNWIRNIEQHASDNVNKILVGNKADMDESKRAVPTSKGQALADEYGIKFFETSAKTNMNVEEVFFSIARDIKQRLSESDSKTEPQAIKINQSDQAGTSGQAVQKSSCCGS	0	0	0	0	2	0	0	0	0
NbS00009404g0009.1 protein AED:0.11 eAED:0.11 QI:0|0.6|0.16|0.66|0.8|1|6|0|616; (*SWP) sp|Q66GP0|Y5738_ARATH (e_value=0.0) BTB/POZ domain-containing protein At5g67385 OS=Arabidopsis thaliana GN=At5g67385 PE=2 SV=2;; (*TAIR) AT5G67385.1 (e_value=0.0) | Symbols: | Phototropic-responsive NPH3 family protein | chr5:26884754-26887083 FORWARD LENGTH=604;; (*ITAG) Solyc02g092560.2.1 (e_value=0.0) genomi…	MVDLDSDGIEQPSGVNNMSTKKKEILSTAMKRTSDWIFSQEIPSDVTVNAGGSAFSLHKFPLVSKSGYIRKIISESNDVDVSIVEIPDIPGGSDAFELAAKFCYGINFEISTENIALLRCTAEYLEMTEDYAVGNLVGRTEAYLNEVALKSLAGAVSILHSSESLLPIAEKVKLVSRCIDTIAYIACKDNQFCTSGRAENGTNGLNSSTSSNPKPMVDWWAEDLTVLRIDFFQRVLIAMMGRGFKQYALGPILMLYAQKSLRGLEIFGKGRKKIEPKQEHEKRVVLETIVSLLPREKNAMSVSFLSMLLRAAIYLETTVACRLDLEKRMALQLGQAVLDDLLIPSYSFTGDTLFDVETVQRIIMNFLDNEMDGSRLGDEEYVSPSLSDMERVGKLMENY…	0	0	0	0	7	0	0	0	0
NbS00012117g0008.1 protein AED:0.25 eAED:0.25 QI:0|1|0.5|1|1|1|2|0|691; (*GB) gi|356524700|ref|XP_003530966.1| (e_value=0.0) PREDICTED: probable inactive receptor kinase At1g48480-like isoform 1 [Glycine max];; (*SWP) sp|Q9LP77|Y1848_ARATH (e_value=0.0) Probable inactive receptor kinase At1g48480 OS=Arabidopsis thaliana GN=RKL1 PE=1 SV=1;; (*TAIR) AT1G48480.1 (e_value=0.0) | Symbols: RKL1 | recep…	MSSKILIFFTISIFLIFRPTTSDIASDRLALLSIRSALRGRSLLWNITSPTCSWPGVICSPDKSSVLELHLPGMGLSGQIPPGLFSNLTKLNFLSLRYNALSGVIPADLFSPLKDLKNLYLQHNLFSGPVPDSIFSLSNLVRLNLAHNNFSGPIPSSFNNLTGLGTLYLQDNGFSGQIPDINLPGLVQFNVSDNQLNGSIPSKLSGQPKDSFLGTSLCGKPLDSCVNNNSNGDEGGKKKKLSGGALAGIVIGCVIGLLLFLLLLFFCCCRKRSNKETTRSADVAGVKEVGIEIPEEKGVENNGGKDGFLGSAIAAIGVGGGNKDKGKAEAIVGNGKSLVFFGKMNKSFDLDDLLKASAEVLGKGTFGTAYKAALESGITLVVKRLRDVTVPEKEFREKI…	0	0	0	0	3	1	0	0	0
NbS00003868g0209.1 protein AED:0.13 eAED:0.13 QI:0|1|1|1|0.83|0.85|7|380|767	MGFLNFFVIVLVIWGFFIANSYQLLLSYETQALLQLRKHLEYPIQLDVWENYNGDFCSLTSTLHMSITCQDNSVTELKIRGDKLVKLNDQFYGFAVPNKTLSEGFSIDSFVTTLTRLNSLKVLTLVSLGIWGPLPDKIHRLSSLELLDMSSNFLFGSVPFQMSRLIKLHTLTFDGNFFNDTVPDWLDSLTNLTILSLKNNRLKGQFPISVSKITTLTDIVLSHNVISGKLPDLTALSSLLLLDLRENHLDSELPPLPKGVTTVLLSSNGFSGEIPVEFGSLNQLQHLDLSNNSLVGMPPADLFSLPNISYLNLASNVLSGSLPDHLNCGGELGFVDISDNRLVGRLPSCLNTISDKRIVKVGGNCLSLETQYQHSEGYCKQAKKHIKGKEIALLAGVIL…	0	0	0	0	2	0	0	0	0
NbS00013010g0005.1 protein AED:0.30 eAED:0.31 QI:0|0.66|0.42|1|1|1|7|0|576; (*SWP) sp|Q9C6L8|ALMT4_ARATH (e_value=0.0) Aluminum-activated malate transporter 4 OS=Arabidopsis thaliana GN=ALMT4 PE=3 SV=1;; (*TAIR) AT1G25480.1 (e_value=0.0) | Symbols: | Aluminium activated malate transporter family protein | chr1:8948467-8950876 FORWARD LENGTH=548;; (*ITAG) Solyc03g096820.2.1 (e_value=0.0) genomic_r…	MAYLGSLKQSFVETNKERILLPRKGYSELGVGGGASFTGNENFLERLRYRVSEFCNDVTKAAAKAVKMGRSDPRKIIFSAKVGFALALVSILKMGRSDPRKIIFSAKVGFALALVSILIFFKEPLPYIGKHSIWAILTVVVVFEFSIGATLSKGFNRALGTFSAGGLALGFCATYLKLYPAMKQYEYGFRVFLLTYCIVLVSGTSDFVQTAVSRLLLIGVGATVCLLINVCIYPIWAGEDLHKLVGKNFKGVATSLEGCVNDYLQCLEYERIPSKILLYQASDDPVYNGYRTAVESTNQEDSLLGFAVWEPPHGRYRMLNYPWGEYVKVSGALRHCAFMVMAMHGCILSEIQAASELRQVFRKQIQRVGTEGAKVIRQLGEKVEKMEKLFPGDPLEEVH…	0	0	0	0	2	0	0	0	0
NbS00029951g0016.1 protein AED:0.12 eAED:0.12 QI:0|1|0.72|1|0.7|0.72|11|0|1065; (*GB) gi|297733757|emb|CBI15004.3| (e_value=0.0) unnamed protein product [Vitis vinifera];; (*TAIR) AT3G48200.1 (e_value=0.0) | Symbols: | unknown protein; FUNCTIONS IN: molecular_function unknown; INVOLVED IN: biological_process unknown; LOCATED IN: endomembrane system; EXPRESSED IN: 21 plant structures; EXPRESSED DU…	MGREKSSSLILLSWVFLVLSFRVNCGGSEVSLKLLRTPRAFSNRNFAKFAFQVLAGGNGDICADCSTYCKLDDHMPSVCASGEILYTRLLDGNHTFEVCTNGSHGAGCTSYNWTVDTIPPTAYITSETSFTNASNVSVNISFSEPCWTQGGFGCSSTNSCNLLVYGPGQVVPNTLNVIEPDLKFSVVVSLSTRDQYGRVVVVMDKNFCSDSAGNKFKRTENSRIFMHFDRRTVSLDIRTQIPERLLQIDSEMRTVLATNRTENMKVYLYFTEPIVNSSTEILNSLNISQGLVTPISGNSLGERRFGFQIKGISQMAIVTLSLRSSLLLSRQGTSVAPVTPLTFLYDMQRPAVSLSTTSRMRTCEEQIPVWIKFVKPVFGFNSSHVSIIGGHLQSFQEMS…	0	0	0	0	2	0	0	0	0
NbS00034939g0010.1 protein AED:0.16 eAED:0.16 QI:283|1|1|1|0.93|0.93|16|194|666; (*GB) gi|193290710|gb|ACF17663.1| (e_value=0.0) putative long-chain acyl-CoA synthetase [Capsicum annuum];; (*SWP) sp|Q9T0A0|LACS4_ARATH (e_value=0.0) Long chain acyl-CoA synthetase 4 OS=Arabidopsis thaliana GN=LACS4 PE=2 SV=1;; (*TAIR) AT4G23850.1 (e_value=0.0) | Symbols: LACS4 | AMP-dependent synthetase and ligase …	MAQEKFIVEVEPAKPSQNGKPSMGAVYRSLFAKDGFPPPIPGLDSCWDIFRLSVEKYPNNRMLGRREIVDGKPGKYVWMSYKEVYDIVIKVGNSIRSCGVDEGEKCGIYGANCPEWIMSMEACNAHGLYCVPLYDTLGAGAVEFIINHAEVKIAFVEEKKLPELLKTFPNATEYLKTVVSFGNVTRQQKEEVEKCGVALYSWDEFLQLGSEKQFDLPVKKKEDICTIMYTSGTTGDPKGVLISNNSIVTLIAGVQRLLGSVNESLTVDDVYLSYLPLAHIFDRVIEECFINHGASIGFWRGDVKLLTEDIGELKPTIFCAVPPVLDRIYSGLQQKISSGGLLKSTLFNLAYAYKHHNLKKGRKHFEASPLSDKVVFSKVKEGLGGKVRLILSGAAPLAA…	0	0	0	0	2	0	0	0	0
NbS00061478g0003.1 protein AED:0.27 eAED:0.27 QI:0|1|0.75|1|1|1|4|0|523; (*GB) gi|19885|emb|CAA47324.1| (e_value=0.0) monosaccharid transporter [Nicotiana tabacum];; (*SWP) sp|Q41144|STC_RICCO (e_value=0.0) Sugar carrier protein C OS=Ricinus communis GN=STC PE=2 SV=1;; (*TAIR) AT1G11260.1 (e_value=0.0) | Symbols: STP1, ATSTP1 | sugar transporter 1 | chr1:3777460-3780133 FORWARD LENGTH=522;; (*ITA…	MAGGGGIGPGNGKEYPGNLTLYVTVTCIVAAMGGLIFGYDIGISGGVTSMDSFLSRFFPSVFRKQKADDSTNQYCKFDSQTLTMFTSSLYLAALLSSLVASTVTRKLGRRLSMLSGGVLFCAGALINGFAQNVAMLIVGRILLGFGIGFANQSVPLYLSEMAPYKYRGALNIGFQLSITIGILVANVLNYFFAKIHWGWRLSLGGAMVPALIITIGSLFLPETPNSMIERGNHDEAKARLQRIRGIDDVDEEFNDLVVASEASRKIENPWRNLLQRKYRPHLTMAIMIPFFQQLTGINVIMFYAPVLFKTIGFGSDASLMSAVITGGVNVLATVVSIYYVDKLGRRFLFLEGGIQMLICQVAVSICIAIKFGVNGTPGDLPKWYAIVVVIFICVYVAGF…	0	0	0	0	2	0	0	0	0
NbS00002894g0003.1 protein AED:0.02 eAED:0.02 QI:0|1|0.5|1|1|1|2|0|386; (*GB) gi|78191448|gb|ABB29945.1| (e_value=0.0) ADP/ATP translocator-like [Solanum tuberosum];; (*SWP) sp|P25083|ADT1_SOLTU (e_value=0.0) ADP,ATP carrier protein, mitochondrial OS=Solanum tuberosum GN=ANT PE=2 SV=1;; (*TAIR) AT5G13490.2 (e_value=0.0) | Symbols: AAC2 | ADP/ATP carrier 2 | chr5:4336034-4337379 FORWARD LENGTH=385…	MADMNQHPAVFQKAANQLHLSSSLSQDVHARHGCVQPAVYQKRFAYGNYSNAGLQTCQATQDLSLITSNASPVFVQAPQEKGLAAFATDFLMGGVSAAVSKTAAAPIERVKLLIQNQDEMLKAGRLSEPYKGIGDCFGRTIKDEGIGSLWRGNTANVIRYFPTQALNFAFKDYFKRLFNFKKDRDGYWKWFAGNLASGGAAGASSLLFVYSLDYARTRLANDAKASKKGGERQFNGLVDVYRKTLKSDGIAGLYRGFNISCVGIIVYRGLYFGMYDSLKPVLLTGNLQDSFFASFGLGWLITNGAGLASYPIDTVRRRMMMTSGEAVKYKSSFDAFSQIVKNEGPKSLFKGAGANILRAVAGAGVLAGYDKLQVIVFGKKYGSGGA	0	0	1	0	2	0	1	0	0
NbS00017949g0009.1 protein AED:0.29 eAED:0.29 QI:81|1|1|1|0.66|0.75|4|419|386; (*GB) gi|78191448|gb|ABB29945.1| (e_value=0.0) ADP/ATP translocator-like [Solanum tuberosum];; (*SWP) sp|P25083|ADT1_SOLTU (e_value=0.0) ADP,ATP carrier protein, mitochondrial OS=Solanum tuberosum GN=ANT PE=2 SV=1;; (*TAIR) AT5G13490.2 (e_value=0.0) | Symbols: AAC2 | ADP/ATP carrier 2 | chr5:4336034-4337379 FORWARD LEN…	MADMNQHPTVFQKAANQLHLSSSLSQDVHARHGGLQPAVYLRRFAYGNYSNAGLQTCQATQDLSLITSNASPVFVQAPQEKGLAAFATDFLMGGVSAAVSKTAAAPIERVKLLIQNQDEMLKAGRLSEPYKGIGDCFGRTIKDEGIGSLWRGNTANVIRYFPTQALNFAFKDYFKRLFNFKKDRDGYWKWFAGNLASGGAAGASSLLFVYSLDYARTRLANDAKASKKGGERQFNGLVDVYRKTLKSDGIAGLYRGFNISCVGIIVYRGLYFGMYDSLKPVLLTGNLQDSFFASFGLGWLITNGAGLASYPIDTVRRRMMMTSGEAVKYKSSFDAFSQIVKNEGPKSLFKGAGANILRAVAGAGVLAGYDKLQVIVFGKKYGSGGA	0	0	1	0	2	0	1	0	0
NbS00020014g0003.1 protein AED:0.26 eAED:0.29 QI:0|0.66|0.75|1|1|1|4|459|410; (*GB) gi|78191448|gb|ABB29945.1| (e_value=0.0) ADP/ATP translocator-like [Solanum tuberosum];; (*SWP) sp|P25083|ADT1_SOLTU (e_value=0.0) ADP,ATP carrier protein, mitochondrial OS=Solanum tuberosum GN=ANT PE=2 SV=1;; (*TAIR) AT5G13490.2 (e_value=0.0) | Symbols: AAC2 | ADP/ATP carrier 2 | chr5:4336034-4337379 FORWARD LENG…	MFELVCVVISFSIMLNMQTSFNIAMADMNQHPTVFQKAANQLHLSSSLSQDVHARHVGVQPAVYQRRFAYGKYSNAGLQTCQATQDLSLITSNASPVFVQAPQEKGLAAFATDFLMGGVSAAVSKTAAAPIERVKLLIQNQDEMLKAGRLSEPYKGIGDCFGRTIKEEGIGSLWRGNTANVIRYFPTQALNFAFKDYFKRLFNFKKDRDGYWKWFAGNLASGGAAGASSLLFVYSLDYARTRLANDAKASKKGGERQFNGLVDVYRKTLKSDGIAGLYRGFNISCVGIIVYRGLYFGMYDSLKPVLLTGNLQDSFFASFGLGWLITNGAGLASYPIDTVRRRMMMTSGEAVKYKSSFDAFSQIVKNEGAKSLFKGAGANILRAVAGAGVLAGYDKLQVI…	0	0	1	0	2	0	1	0	0
NbS00023409g0015.1 protein AED:0.33 eAED:0.33 QI:0|0.83|0.71|1|0.83|0.85|7|0|399; (*GB) gi|225451635|ref|XP_002277073.1| (e_value=1e-173) PREDICTED: nodulation receptor kinase [Vitis vinifera];; (*SWP) sp|Q9LX29|ACR4_ARATH (e_value=5e-50) Serine/threonine-protein kinase-like protein ACR4 OS=Arabidopsis thaliana GN=ACR4 PE=1 SV=1;; (*TAIR) AT3G26700.1 (e_value=8e-156) | Symbols: | Protein kinase s…	MSRTLAAIVGGAAGAVALVGIVIVILWFCIFHKRSISRTSETGSSDPSIQVGKTAGIELTLRDARRFQIEELSLATKGFSDKSLIGQGKFGEVYKGLLHDGMLVAIKRRSIVPSQEFIDEHRNLVTLLGYCQKRDQQILVYEYIPNGSVSVHLYGDDHVTQEKLEFKHRLSIALGAAKGLAHLHSLSPRLIHKDFKTANVLVDENFIAKVADAGIRNFLGRFEVAGPSSQVAADEIFLAPEVREFRRFSEKSDAYSFGVFLLELVSGREAMDLLSSDLNINIVEWVENYQESGNISAIIDQRLGNSFTTEGMGELMQLTVRCMDPSSERRPTMSYVVAELDRILEKEMSLTTIMGEGTPVVTLGSPPTRILEKEMSLTTIMGEGTPVVTLGSQLFRASK	0	0	0	0	3	1	1	0	0
NbS00041871g0005.1 protein AED:0.31 eAED:0.31 QI:395|1|0.83|1|0.6|0.5|6|0|281; (*GB) gi|356525876|ref|XP_003531547.1| (e_value=7e-162) PREDICTED: probable protein phosphatase 2C 10-like [Glycine max];; (*SWP) sp|Q9S9Z7|P2C10_ARATH (e_value=8e-148) Probable protein phosphatase 2C 10 OS=Arabidopsis thaliana GN=At1g34750 PE=1 SV=1;; (*TAIR) AT1G34750.1 (e_value=6e-149) | Symbols: | Protein phosphata…	MDSLCCFNSGNSQLAGGRSSCGKGRSHQGPAKYGFSLVKGKANHPMEDYHVAKFTQLRRGELGLFAIYDGHSGDNVASYLQKHLFSNIINEEDFWTDPHSSILKAYERTDDAILSHNPDLGQGGSTAVTAILINGRKLWIANVGDSRAVLSRRGQAIQMSVDHEPHTERSSIENKGGFVTKMPGDVARVNGQLAVSRAFGDKNLKSHLRSDPDVRHIDVDGTIDILILASDGLWKVMSNQEAVDIAKKVKDPQKAAKQLVIEALTRESKDDISCIVIRFKG	0	0	0	0	2	0	0	0	0
NbS00013067g0003.1 protein AED:0.26 eAED:0.26 QI:384|0.87|0.88|1|0.75|0.66|9|0|571; (*SWP) sp|Q94II3|PMTL_ARATH (e_value=0.0) Probable methyltransferase PMT21 OS=Arabidopsis thaliana GN=ERD3 PE=2 SV=1;; (*TAIR) AT4G19120.2 (e_value=0.0) | Symbols: ERD3 | S-adenosyl-L-methionine-dependent methyltransferases superfamily protein | chr4:10460665-10463034 REVERSE LENGTH=600;; (*ITAG) Solyc08g005490.2.…	MKHKDGKPYQSDKSSWKVPMALTVVVLCGLSFYLGGIFCSEKERYVAEDVSKEVETPTGTATRAVQVKAISFPECSADFQDYTPCTDPKRWHKYGKHRLTFLERHCPPSFERQECLVPPPDGYKSPIRWPKSRDECWYRNVPYDWINKQKSNQHWLKKEGEKFLFPGGGTMFPNGVGSYVDLMQDLIPQMKDGTIRTAIDTGCGVASWGGDLLDRGILTVSLAPRDNHQAQVQFALERGIPAILGIISTQRLPFPSNSFDMAHCSRCLIPWTEFGGVYLLEIHRILRPGGFWVLSGPPVNYQHRWRGWNTTIEEQKSDYDKLQELLTSMCFKLFNKKDDIAVWQKLSDSNCYKKLDNPDNYPSKCDDGTEPDSAWYTPLRPCVVVPNPFAKKLKLDTLA…	0	0	1	0	2	1	0	0	0
NbS00003775g0004.1 protein AED:0.20 eAED:0.27 QI:205|0.57|0.75|1|0.85|0.75|8|433|509; (*GB) gi|225435758|ref|XP_002285721.1| (e_value=0.0) PREDICTED: tubulin alpha-1 chain [Vitis vinifera];; (*SWP) sp|Q9ZRJ4|TBA_CHLVU (e_value=0.0) Tubulin alpha chain OS=Chlorella vulgaris GN=TUBA PE=3 SV=1;; (*TAIR) AT1G64740.1 (e_value=0.0) | Symbols: TUA1 | alpha-1 tubulin | chr1:24050114-24052296 FORWARD LENG…	MREIISIHIGQAGIQVGNSCWELYCLEHDIHPDGMMPRCAKSHPSKTNDGRIGLGRAYAMLCLQLTFSGVVKNMDCIIGVCCGVPWKLKGGVVVHADDDNSPGVGHDAFNTFFSETSAGKHVPRAIFVDLEPTVIDEVRTGTYRQLFHPEQLISGKEDAANNFARGHYTVGKEIVDLCLDRVRKLADNCTGLQGFLVFNAVGGGTGSGLGSLLLERLSVDYGKKSKLGFTIYPSPQVSTAVVEPYNSVLSTHSLLEHTDVVVMLDNEAIYDICRRSLDIERPTYTNLNRLISQIISSLTTSLRFDGAINVDITEFQTNLVPYPRIHFMLSSYAPVISAEKAFHEQLSVPEITNAVFEPSSMMAKCDPRHGKYMACCLMYRGDVVPKDVNAAVATIKTKR…	0	0	0	0	2	0	0	1	0
NbS00027138g0007.1 protein AED:0.29 eAED:0.30 QI:0|0.6|0.66|1|0.8|0.83|6|219|437; (*GB) gi|225435758|ref|XP_002285721.1| (e_value=0.0) PREDICTED: tubulin alpha-1 chain [Vitis vinifera];; (*SWP) sp|Q02245|TBA5_MAIZE (e_value=0.0) Tubulin alpha-5 chain OS=Zea mays GN=TUBA5 PE=2 SV=1;; (*TAIR) AT5G19780.1 (e_value=0.0) | Symbols: TUA5 | tubulin alpha-5 | chr5:6687212-6688926 FORWARD LENGTH=450;; (*I…	MREIISIHIGQAGIQLKDGVLVHADDDNSPGVGHDAFNTFFSETSAGKHVPRAIFVDLEPTVIDEVRTGTYRQLFHPEQLISGKEDAANNFARGHYTVGKEIVDLCLDRVRKLADNCTGLQGFLVFNAVGGGTGSGLGSLLLERLSVDYGKKSKLGFTIYPSPQVSTAVVEPYNSVLSTHSLLEHTDVVVMLDNEAIYDICRRSLDIERPTYTNLNRLISQIISSLTTSLRFDGAINVDITEFQTNLVPYPRIHFMLSSYAPVISAEKAFHEQLSVPEITNAVFEPSSMMAKCDPRHGKYMACCLMYRGDVVPKDVNAAVATIKTKRTVQFVDWCPTGFKCGINYQPPTVVPGGDLAKVQRAVCMISNNTAVAEVFSRIDHKFDPMYAKRAFVHWYVGE…	0	0	0	0	2	0	0	1	0
NbS00000247g0008.1 protein AED:0.26 eAED:0.27 QI:16|0.85|0.73|1|1|1|15|0|662; (*GB) gi|416664|sp|Q03194.1|PMA4_NICPL (e_value=0.0) RecName: Full=Plasma membrane ATPase 4; AltName: Full=Proton pump 4;; (*SWP) sp|Q03194|PMA4_NICPL (e_value=0.0) Plasma membrane ATPase 4 OS=Nicotiana plumbaginifolia GN=PMA4 PE=2 SV=1;; (*TAIR) AT2G18960.1 (e_value=0.0) | Symbols: AHA1, PMA, OST2, HA1 | H(+)-ATPase 1 …	MAKAISLEEIKNETVDLEKIPIEEVFEQLKCTREGLSADEGANRLQIFGPNKLEEKSESKILKFLGFMWNPLSWVMEAAAARAGIREVHFLPFNPVDKRTALTYIDNNNNWHRASKGAPEQILDLCNAKEDVRRKVHAIMDKYAERGLRSLAVARQEVPEKSKESPGGRWEFVGVLPLFDPPRHDSAETIRRALNLGVNVKMITGDQLAIAKETGRRLGMGTNMYPSASLLGQDKDSAIASLPVEELIEKADGFAGVFPEHKYEIVKKLQERKHIVGMTGDGVNDAPALKKADIGIAMLLMQHEALLILKKADIGIAVADATDAARGASDIVLTEPGLSVIISAVLTSRAIFQRMKNYTIYAVSITIRIVFGFMFIALIWQYDFSAFMVLIIAILNDGT…	0	0	1	0	7	7	1	2	1
NbS00049664g0004.1 protein AED:0.29 eAED:0.29 QI:0|0.6|0.33|0.66|1|0.83|6|0|236; (*GB) gi|584795|sp|Q08436.1|PMA3_NICPL (e_value=1e-107) RecName: Full=Plasma membrane ATPase 3; AltName: Full=Proton pump 3;; (*SWP) sp|Q08436|PMA3_NICPL (e_value=4e-109) Plasma membrane ATPase 3 OS=Nicotiana plumbaginifolia GN=PMA3 PE=1 SV=1;; (*TAIR) AT5G62670.1 (e_value=1e-98) | Symbols: AHA11, HA11 | H(+)-ATPase …	MGGKPEVLDAVLKETVDLENIPIEEVFENLRCTKDGLTATAAQERLSIFGYNKLEEKKESKFLKFLGFMWNPLSWVMEAAAIMAIALANGGGKPPDWQDFVGIITLLIINSTISFIEENNAGNAAAALMARLAPKAKVLRDRKWKEEDAAVLVPGDIISIKLGDIIPADARLLEGDPLKIDQSALTGESLPVTKGPGDGVYSGSTCKQGEIEAIVIATGVHTFFGKAAHLVDSTNQ	0	0	0	0	3	2	0	2	0
NbS00015339g0013.1 protein AED:0.20 eAED:0.20 QI:0|0.95|0.80|1|1|0.95|21|0|931; (*GB) gi|584795|sp|Q08436.1|PMA3_NICPL (e_value=0.0) RecName: Full=Plasma membrane ATPase 3; AltName: Full=Proton pump 3;; (*SWP) sp|Q08436|PMA3_NICPL (e_value=0.0) Plasma membrane ATPase 3 OS=Nicotiana plumbaginifolia GN=PMA3 PE=1 SV=1;; (*TAIR) AT5G62670.1 (e_value=0.0) | Symbols: AHA11, HA11 | H(+)-ATPase 11 | chr5…	MTAIEEMAGMDVLCSDKTGTLTLNKLTVDKYLIEVFARGVDADTVVLMAARASRTENQDAIDAAIVGMLADPKEARAGIREIHFLPFNPTDKRTALTYLDGEGKMHRVSKGAPEQILHLAHNKSDIEHRVHAVIDKFAERGLRSLAVAYQEVPEGRKESAGGPWQFIALLPLFDPPRHDSAETIRRALNLGVNVKMITGDQLAIGKETGRRLGMGTNMYPSSALLGQTKDESISALPVDELIEKADGFAGVFPDNLLVLLIGGIPIAMPTVLSVTMAIGSHRLAQQGAITKRMTAIEEMAGMDVLCSDKTGTLTLNKLTVDKYLIEVFARGVDADTVVLMAARASRTENQDAIDAAIVGMLADPKEARAGIREIHFLPFNPTDKRTALTYLDGEGKMHR…	0	0	1	0	5	4	0	0	2
NbS00006294g0017.1 protein AED:0.24 eAED:0.24 QI:354|0.83|0.69|1|0.75|0.84|13|0|913; (*SWP) sp|Q2HXL0|RBOHC_SOLTU (e_value=0.0) Respiratory burst oxidase homolog protein C OS=Solanum tuberosum GN=RBOHC PE=1 SV=2;; (*TAIR) AT5G47910.1 (e_value=0.0) | Symbols: RBOHD, ATRBOHD | respiratory burst oxidase homologue D | chr5:19397585-19401768 FORWARD LENGTH=921;; (*ITAG) Solyc03g117980.2.1 (e_value=0.0…	MQNSENHHPHHHHHHSDTEIIGNDRASYSGPLSGPLNKRGGKKSARFNIPESTDIGTSVGTGAKSNDDAYVEITLDVREDSVAVHSVKTAGGDDVEDPELALLAKGLEKKSTLGSSLVRNASSRIRQVSQELRRLASLNKRPIPTGRFDRNKSAAAHALKGLKFISKTDGGGAGWAAVENRFDEITASTTGLLPRVKFGECIGMNKESKEFAVELYDALARRRNITTDSINKAQLKEFWDQVADQSFDSRLQTFFDMVDKDADGRITEEEVREIIGLSASANRLSTIQKQADEYAAMIMEDTKSISAKRRRKSELESNAKSKTKAYTREKSNSKMVQEFHDNWQRVWVLLLWIGIMAGLFTWKYIQYKEKAAYKVMGPCVCFAKGAAETLKLNMAIILL…	0	0	0	0	4	3	0	1	2
NbS00055894g0005.1 protein AED:0.32 eAED:0.32 QI:0|0.95|0.91|1|0.68|0.73|23|138|953; (*GB) gi|113911589|gb|ABI48276.1| (e_value=0.0) phototropin-2 [Solanum lycopersicum];; (*SWP) sp|P93025|PHOT2_ARATH (e_value=0.0) Phototropin-2 OS=Arabidopsis thaliana GN=PHOT2 PE=1 SV=2;; (*TAIR) AT5G58140.1 (e_value=0.0) | Symbols: PHOT2, NPL1 | phototropin 2 | chr5:23524771-23529993 FORWARD LENGTH=915;; (*ITAG…	MDSSSSGYKDQRRSLDVFDPTLTREGGKSASSRNEGIDVQEVPMKGVESGTMTGTNKPMNKWMAFDPNGKKGEDNGNANSQIPSEPSIAARAAEWGLTVRTDVGEGSFHAISRSGENSFADGERGKNSLEKYSVGSTRTSEESYEDTRFPRVSQELKDALATLQQTFVVSDATKPDCPIVYASSGFFTMTGYSSKEIGKDTDQKEVEKIREAVKTGKSYCGRLLNYKKNGTPFWNLLTVTPIKDDTGKTIKFIGMQVEVSKYTEGINEKALRPNGLPKSLIRYDARQKEKALGSITEVVQTVKNPRSHMKSASQDASSRTDKEKLQLDFMLPKSAETESMKTPGRYTPRWETASDMSVQESDKKSRKSARVSLKGFKGRSSSISAPLENEQNIGPEVQM…	0	0	0	0	0	3	0	0	2
NbS00007582g0003.1 protein AED:0.33 eAED:0.34 QI:0|0|0|1|1|1|3|0|335; (*GB) gi|57013986|ref|YP_173458.1| (e_value=3e-91) hypothetical protein NitaMp120 [Nicotiana tabacum];; (*SWP) sp|P05495|ATPAM_NICPL (e_value=5e-87) ATP synthase subunit alpha, mitochondrial OS=Nicotiana plumbaginifolia GN=ATPA PE=3 SV=1;; (*ITAG) ATMG01190.1 (e_value=5e-81) | Symbols: ATP1 | ATP synthase subunit 1 | chrM:30216…	MVFVGLDLENQMMMAPSGASGSGSRESAGQRIRLERWRRGFRWTDLFGSSSPSNYEASLNQPAPDSPNPSESVAPIAEVYHPLQEDKQRRQELSDRLSINTVKRSLPEDISEAIIETQLQIELNIEEALRLDRVQEGSILEKRHQIRGVLFYPFGRAFSLDTYLDHLKQIENQGTHRSRLYKRLMDEIIGNFYTKFQVDQIGRVVSVGDGIARVYGLNEIQAGEMVEFASGVKGISLNLKNENVWILVFGSDTAIKEGDLVKRTGSIVDVPAGKAMLGRVVDGLGVPIDGRGALSDHERRHADLKAPGIFERKYVHEPMQTGLKAVDSLVPIGCG	0	0	0	0	1	0	2	0	0
NbS00058225g0005.1 protein AED:0.06 eAED:0.06 QI:190|1|0.33|1|0|0.33|3|0|360; (*GB) gi|63253080|dbj|BAD98314.1| (e_value=0.0) peroxidase [Nicotiana tabacum];; (*SWP) sp|P12437|PERX_SOLTU (e_value=2e-160) Suberization-associated anionic peroxidase OS=Solanum tuberosum PE=2 SV=2;; (*TAIR) AT5G05340.1 (e_value=3e-70) | Symbols: | Peroxidase superfamily protein | chr5:1579142-1580819 REVERSE LENGTH=3…	MAFRLSHLSLALSLLALALAGVAIYRNTYEAMSKGFQTLSPELDLLESAASILTLNNNNAEKNSESKLTQPLSPTACIFSAVQGVVNSAIDRERRMGASLIRLHFHDCFVDGCDGGVLLDDIPGSFIGEKTSPPNNNSARGFEVIEQAKLRVKYVCPNTPVSCADILAIAARDSVVKLGGQGYNVALGRRDARAANFTGALTQLPAPFDNLTVQLRKFNDKNFNAREMVALAGAHTVGFTRCVTACNSNNVNPAARLQCNCSVTQNDTNLQQLDTTPAVFDRVYFQDLNRNQGILFSDQVLTGNTTTAAIVTTYSNNGAVFLGDFAAAMIKMGNLPPSPGVQLEIRDVCSRVNPSSVASM	0	0	0	0	0	0	2	0	0
NbS00000215g0010.1 protein AED:0.11 eAED:0.11 QI:211|1|1|1|0.85|0.8|15|450|605; (*GB) gi|225442531|ref|XP_002284134.1| (e_value=0.0) PREDICTED: ruBisCO large subunit-binding protein subunit beta, chloroplastic [Vitis vinifera];; (*SWP) sp|P21240|CPNB1_ARATH (e_value=0.0) Chaperonin 60 subunit beta 1, chloroplastic OS=Arabidopsis thaliana GN=CPN60B1 PE=1 SV=3;; (*TAIR) AT1G55490.2 (e_value=0.0) | …	MAATFTSVCSIASASQAVDKNLINSSETLSSFSVISSSSLWGRRKNTVLKKRYDFKIQAATKKLHFNQDGDAIRKLQAGVDKLANLVGVTLGPKGRNVVLESKYGSPKIVNDGVTVAREVELEDPVENIGASLVRQAASKTNDLAGDGTTTSVVLAQGLIAEGVKVVAAGANPIQITRGIERTTKSLVAELKKMSKEVEDSELADVAAVSAGNNYEVGNMIAEAMGKVGRKGVVTLEEGRGAENSLYVVEGMQFDRGYISPYFVTDNEKMVAEYENCKLLLVDKKITNARDLVNVLEEAIRGGYPILIIAEDIEQEALATLVVNKLRGTLKIAALKAPGFGERKSQYLDDIAILTGGTVIREEVGLSLDRAGSEVLGHAGKVVLSKDSTTIVGDGSTQE…	0	1	1	0	0	0	3	0	0
NbS00007027g0009.1 protein AED:0.13 eAED:0.13 QI:197|1|1|1|0.92|0.86|15|612|605; (*GB) gi|225442531|ref|XP_002284134.1| (e_value=0.0) PREDICTED: ruBisCO large subunit-binding protein subunit beta, chloroplastic [Vitis vinifera];; (*SWP) sp|P08927|RUBB_PEA (e_value=0.0) RuBisCO large subunit-binding protein subunit beta, chloroplastic OS=Pisum sativum PE=1 SV=2;; (*TAIR) AT1G55490.2 (e_value=0.0) …	MAATFTSVCSIASTSQAVDKKLINSSETLSSFSAISSSSLGGRRKNTVLKKRYDFKIQAATKKLHFNQDGDAIRKLQAGVDKLANLVGVTLGPKGRNVVLESKYGSPKIVNDGVTVAREVELEDPVENIGASLVRQAASKTNDSAGDGTTTSVVLAQGLIAEGVKVVAAGANPIQITRGIERTTKALVAELKKMSKEVEDSELADVAAVSAGNNYEVGNMIAEAMGKVGRKGVVTLEEGRGSENSLYVVEGMQFDRGYISPYFVTDNEKMVAEYENCKLLLVDKKITNARDLVNVLEEAIRGGYPILIIAEDIEQEALATLVVNKLRGALKIAALKAPGFGERKSQYLDDIAILTGGTVIREEVGLSLDRAGSEVLGHAGKVVLSKDSTTIVGDGSTQE…	0	1	1	1	0	0	3	1	0
NbS00029818g0008.1 protein AED:0.02 eAED:0.02 QI:130|0.5|0.66|1|1|1|3|344|415; (*GB) gi|350539996|ref|NP_001234860.1| (e_value=0.0) mitochondrial succinate dehydrogenase iron sulfur subunit [Solanum lycopersicum];; (*SWP) sp|Q8LB02|DHSB2_ARATH (e_value=2e-159) Succinate dehydrogenase [ubiquinone] iron-sulfur subunit 2, mitochondrial OS=Arabidopsis thaliana GN=SDH2-2 PE=1 SV=2;; (*TAIR) AT5G40650.…	MMSEKRKVNNPRHEPTTLLGNYVVIVNSPRHPSPTQTQFIHGKPYSSTTEKIQPQTTFFTLPKLPLPHPPISSLSMAVKAPIKLDAHFRHFIIIQVKPEKRPIPPSYILLNKIYFFAFSVTRIYPTSASLVSQVKSSMATGLIRRAISRVHSSPAAKLVVARAHASEAKAHQSESKQQPNIKSFQIYRWSPDNPDNPGKPELKEYKIDLKECGPMVLDALIKIKNEIDPSLTFRRSCREGICGSCAMNIDGCNGLACLTKIDSGAESTITPLPHMFVIKDLVVDMTNFYNQYKSIEPWLKRKTEPPTSGKEIPQSKSDRAKLDGMYECILCACCSTSCPSYWWNPESYLGPAALLHANRWIMDSRDEYTQERLDAVNDEFKLYRCHTILNCSRACPKGL…	0	0	0	0	0	0	2	0	0
NbS00014422g0001.1 protein AED:0.31 eAED:0.31 QI:0|-1|0|1|-1|1|1|0|172; (*GB) gi|169930141|gb|ACB05668.1| (e_value=5e-109) cyclophilin [Capsicum annuum];; (*SWP) sp|P21568|CYPH_SOLLC (e_value=2e-106) Peptidyl-prolyl cis-trans isomerase OS=Solanum lycopersicum GN=CYP PE=2 SV=1;; (*TAIR) AT2G21130.1 (e_value=2e-92) | Symbols: | Cyclophilin-like peptidyl-prolyl cis-trans isomerase family protein | c…	MANPKVFFDLTIGGTPAGRVVMELFADTVPKTAENFRALCTGEKGVGRMGKPLHYKGSTFHRVIPGFMCQGGDFTAGNGTGGESIYGAKFADENFKRKHTGPGVLSMANAGPGTNGSQFFICTAKTEWLDGKHVVFGQVVEGYDAIKKAEAVGSGSGRCSKPVVIADCGQLC	0	0	0	0	0	0	3	1	0
NbS00044990g0002.1 protein AED:0.04 eAED:0.04 QI:333|0.66|0.57|1|1|1|7|326|449; (*SWP) sp|Q40460|RCA1_TOBAC (e_value=0.0) Ribulose bisphosphate carboxylase/oxygenase activase 1, chloroplastic OS=Nicotiana tabacum PE=1 SV=1;; (*TAIR) AT2G39730.1 (e_value=0.0) | Symbols: RCA | rubisco activase | chr2:16570951-16573345 REVERSE LENGTH=474;; (*ITAG) Solyc09g011080.2.1 (e_value=0.0) genomic_reference:S…	MATSVSTIGAANKAPLSLNNSVAGTSIPSTAFFGKTLKKVYGKGVSSPKVTNKSLRIVAEKIDADPKKQTDGDRWKGLVQDFSDDQQDITRGKGMVDSLFQAPTGTGTHHAVLQSYEYVSQGLRQYNLDNKLDGFYIAPAFMDKLVVHITKNFLKLPNIKVPLILGIWGGKGQGEPAKLIRQRYREAAEIIRKGNMCCLFINDLDAGAGRMGGTTQYTVNNQMVNATLMNIADNPTNVQLPGMYNKQENARVPIIVTGNDFSTLYAPLIRDGRMEKFYWAPTREDRIGVCTGIFRTDNVPAEDVVKIVDSFPGQSIDFFGALRARVYDDEVRKWVSGTGIEKIGDKLLNSFDGPPTFEQPKMTIEKLLEYGNMLVQEQENVKRVQLADKYLKEAALGDA…	0	0	1	1	1	0	2	1	0
NbS00010737g0014.1 protein AED:0.30 eAED:0.30 QI:416|0.76|0.85|1|0.92|0.85|14|146|436; (*GB) gi|224102443|ref|XP_002312679.1| (e_value=0.0) predicted protein [Populus trichocarpa];; (*SWP) sp|Q9S7E9|GGT2_ARATH (e_value=0.0) Glutamate--glyoxylate aminotransferase 2 OS=Arabidopsis thaliana GN=GGAT2 PE=1 SV=1;; (*TAIR) AT1G70580.4 (e_value=0.0) | Symbols: AOAT2, GGT2 | alanine-2-oxoglutarate aminotr…	MSSKPLDYDNLNENVKKCQYAVRGELYLRASELQKEGKKIIFTNVGNPHALGQKPLTFPRQVIALCQAPFLLDDPNVGFLFPADAIARAKHYLAMTSGGLGAYSDSRGTPGVRKEVAEFIERRDGYPSDPELIFLTDGASKGVMQILNTVIRGPSDGILVPVPQYPLYSASIQLLGGSLVPYYLEETANWGLDINDLRQSVAQARYKGITVRAMVIINPGNPTGQCLSVANLKQIIQFCHQESLVLLGDEVYQQNIYQDERPFISARKIYQDERPFVSARKSVEEIYKVASISLSPNVAGQIFMGLMVNPPKPGDISYDQYVRESKGILESLRKRAHMMTDGAMYSFPQIRLPPRAIEAAKKLGKVPDVFYCLRLLEATGISTVPGSGFGQKEGVFHLR…	0	1	1	0	1	0	3	0	0
NbS00007111g0015.1 protein AED:0.26 eAED:0.26 QI:149|0.93|0.93|1|0.6|0.56|16|379|419; (*GB) gi|53854350|gb|AAU95618.1| (e_value=0.0) cytosolic acetoacetyl-coenzyme A thiolase [Nicotiana tabacum];; (*SWP) sp|Q8S4Y1|THIC1_ARATH (e_value=0.0) Acetyl-CoA acetyltransferase, cytosolic 1 OS=Arabidopsis thaliana GN=AAT1 PE=2 SV=1;; (*TAIR) AT5G48230.2 (e_value=0.0) | Symbols: EMB1276, ACAT2 | acetoacetyl…	MAPAAADSIKPRDVCIVGVARTPMGGFLGSLSSLSATKLGSIAIEGALKKANVDPSLVEEVFFGNVLSANLGQAPARQAALGAGVPNTVVCTTVNKVCASGLKATMLAAQSIQLGINDVVVAGGMESMSNVPKYIAEARKGSRLGHDSLVDGMLKDGLTDVYKDCGMGVCAEICAENHKITREEQDDYAVQSFERGIAAQEAGAFAWEIVPVEVPGGRGKPSIIVDKDDGLGKFDGAKLRKLRPSFKEKDGTVTAGNASSISDGAAALVLVSGEKAIKLGLNVIGKISGYADAAQAPELFTTAPALAIPKAIKSSSLEASQIDFYEINEAFAVVSLANQKLLGLNPEKVNVHGGAVSLGHPLGCSGARILVTLLGVCIETEKRQIWSCWCLQWRRRCLS…	0	1	0	0	1	0	2	0	0
NbS00011007g0119.1 protein AED:0.10 eAED:0.10 QI:52|1|1|1|1|1|11|282|765	MASHIVGYPRMGPKRELKFALESFWDGKSSAEDLKKVSADLRSSIWKQMADAGIKYIPSNTFSYYDQVLDTTAMLGAVPSRYNWTGGEIGFDTYFSMARGNASVPAMEMTKWFDTNYHFIVPELGPDVNFSYASHKAVDEYKEAKGLGVDTVPVLVGPVSYLLLSKPAKGVEKSFPLLSLLDKILPIYKEVITELKAAGASWIQVDEPTLVLDLEAHKLEAFTKAYAELESSLSGLNVIVETYFADVPAEAFKTLTALKGVTGFGFDLVRGAQTLDLIKSGFPSGKYLFAGVVDGRNIWANDLAASLNLLQSLEGIVGKDKLVVSTSCSLLHTAVDLVNEPKLDSEIKSWLAFAAQKVVEVNALARALSGAKDEAVFSANAAAQASRKSSPRVTNEAVQ…	0	0	1	0	0	0	0	2	0
NbS00021103g0006.1 protein AED:0.13 eAED:0.13 QI:0|0.64|0.46|1|0.92|0.8|15|0|846; (*GB) gi|365189292|dbj|BAL42333.1| (e_value=0.0) Heat shock protein 90 [Nicotiana tabacum];; (*SWP) sp|P35016|ENPL_CATRO (e_value=0.0) Endoplasmin homolog OS=Catharanthus roseus GN=HSP90 PE=2 SV=1;; (*TAIR) AT4G24190.2 (e_value=0.0) | Symbols: SHD, AtHsp90.7, AtHsp90-7 | Chaperone protein htpG family protein | chr4:…	MYSIGRRIQANAEAESDVPVDPPKVEEKFGAIPHGLSTDSDVVKRESESMSRKTLRADAEKFEFQAEVSRLMDIIINSLYSNKDIFLRELISNASDALDKIRFLSLTDKEVLGEGDNTKLEIQIKLDKEKKILSIRDRGIGMTKEDLIKNLGTIAKSGTSAFVEKMQTSGDLNLIGQFGVGFYSVYLVADYVEVISKHNDDKQYVWESKADGAFAISEDVWNEPLGRGTEIRLHIRDEAGEYLDEYKLKVCVTGPKETLFIYHDKEVEKEVPADEDESSDEEETCMCDSSYLTCQVYSSVNEVKTKAEDEKKPKTKKVKETTYEWELLNDVKAIWLRNPKEVTEEEYTKFYHSLAKDFSDEKPLAWSHFNAEGDVEFKAVLFVPPKAPHDLYESYYNSK…	0	0	0	0	0	0	0	2	0
NbS00014845g0001.1 protein AED:0.19 eAED:0.19 QI:0|0.66|0.25|1|1|1|4|0|461; (*GB) gi|47219165|emb|CAG01828.1| (e_value=1e-174) unnamed protein product [Tetraodon nigroviridis];; (*SWP) sp|P36181|HSP80_SOLLC (e_value=4e-135) Heat shock cognate protein 80 OS=Solanum lycopersicum GN=HSC80 PE=2 SV=1;; (*TAIR) AT5G56030.1 (e_value=3e-136) | Symbols: HSP81-2, ERD8, HSP90.2, AtHsp90.2 | heat shock prote…	MAEQETFAFQAEINQLLSLIINTFYSNKEIFLRELISNSSDALDKIRFESLTDKSKLDSQPELFIHIIPDKTNNTLTIIDSGIGMTKADLVNNLGTIARSGTKEFMEALAAGADVSMIGQFGVGFYSAYLVAERVVVTTKHNDDEQYVWESQAGGSFTVTRDTSGENLGRGTKITLFLKEDQLEYLEERRLKDLVKKHSEFISYPISLLKDYVTRMKEGQNDIYYITGESKKAVENSPFLEKLKKKGYEVLYMVDAIDEYSIGQLKEFEGKRLVPTTKEDLKLDESEDEKKKHEELKEKFEGLCKVIKDVLGDKVEKVVVSDRVVDSPCCLVTGEYGWTANMERIMKAQALRDSSMAGYMSSKKTMEINPENAIMEELRKRADADKNDKSVKDLVLLLF…	0	0	0	0	0	0	0	2	0
NbS00025260g0001.1 protein AED:0.23 eAED:0.23 QI:0|0.66|0.25|1|1|1|4|0|460; (*GB) gi|47219165|emb|CAG01828.1| (e_value=3e-173) unnamed protein product [Tetraodon nigroviridis];; (*SWP) sp|P36181|HSP80_SOLLC (e_value=4e-135) Heat shock cognate protein 80 OS=Solanum lycopersicum GN=HSC80 PE=2 SV=1;; (*TAIR) AT5G56030.1 (e_value=3e-136) | Symbols: HSP81-2, ERD8, HSP90.2, AtHsp90.2 | heat shock prote…	MAEQETFAFQAEINQLLSLIINTFYSNKEIFLRELISNSSDALDKIRFESLTDKSKLDSQPELFIHIIPDKTNNTLTIIDSGIGMTKADLVNNLGTIARSGTKEFMEALAAGADVSMIGQFGVGFYSAYLVAERVVVTTKHNDDEQYVWESQAGGSFTVTRDTSGENLGRGTKITLFLKEDQLEYLEERRLKDLVKKHSEFISYPISLLKDYVTRMKEGQNDIYYITGESKKAVENSPFLEKLKKKGYEVLYMVDAIDEYSIGQLKEFEGKRLVPTTKEDLKLDESEDEKKKHEELKEKFEGLCKVIKDVLGDKVEKVVVSDRVVDSPCCLVTGEYGWTANMERIMKAQALRDSSMAGYMSSKKTMEINPENAIMEELRKRADADKNDKSVKDLVLLLF…	0	0	0	0	0	0	0	2	0
NbS00010115g0007.1 protein AED:0.28 eAED:0.28 QI:136|0.93|0.94|1|0.68|0.58|17|160|452; (*GB) gi|53854350|gb|AAU95618.1| (e_value=0.0) cytosolic acetoacetyl-coenzyme A thiolase [Nicotiana tabacum];; (*SWP) sp|Q8S4Y1|THIC1_ARATH (e_value=0.0) Acetyl-CoA acetyltransferase, cytosolic 1 OS=Arabidopsis thaliana GN=AAT1 PE=2 SV=1;; (*TAIR) AT5G48230.2 (e_value=0.0) | Symbols: EMB1276, ACAT2 | acetoacety…	MAPAAADSIKPRDVCIVGVARTPMGGFLGSLSSLSATKLGSIAIEGALKKANVDPSLVEEVFFGNVLSANLGQAPARQAALGAGIPNTVVCTTVNKVCASGLKATMLAVQSIQLGINDVVVAGGMESMSNVPKYIAEARKGSRLGHDSLVDGMLKDGLTDVYKDCGMGVCAEICAENHKITREEQDDYAVQSFERGIAAQEAGAFAWEIVPVEVPGGRGKPSIIVDKDDGLGKFDGAKLRKLRPSFKEKDGTVTAGNASSISDGAAALVLVSGEKAIKLGLNVIGKISGYADAAQAPELFTTAPALAIPKAIKSASLEASQIDFYEINEAFAVVSLANQKLLGLNPEKVNVHGGAVSLGHPLGCSGARILVTLLGVCIETEKRQIWRCWCLQWRRRCLS…	0	0	0	0	0	0	0	2	0
NbS00039776g0013.1 protein AED:0.19 eAED:0.19 QI:133|1|1|1|1|1|9|140|612; (*GB) gi|350540086|ref|NP_001234382.1| (e_value=0.0) nuclear GTPase-like [Solanum lycopersicum];; (*SWP) sp|Q54KS4|GNL3_DICDI (e_value=8e-105) Guanine nucleotide-binding protein-like 3 homolog OS=Dictyostelium discoideum GN=gnl3 PE=3 SV=1;; (*TAIR) AT3G07050.1 (e_value=0.0) | Symbols: | GTP-binding family protein | chr3:222…	MVKKSKKSKSKRVSLKKKHKIIRKVKEHHKKKSKEAKKLGLNKKPKVEKDPGIPNDWPFKEQELKALEARRARALEELEQKKAARKERAKKRKLGLLEDDDDDESTPADMTSTKRNNFEEARPNDGSTSFVKHRDNSERAFYKELVKVIDASDVILEVLDARDPLGTRCLDMEKMVMRAGPDKHLVLLLNKIDLIPREAAEKWLKYLREELPTVAFKCSTQEQKSNLGWKPSSKAGKSKTSNLLQTSDCLGAETLIKLLKNYSRSHEIKKSITVGVIGLPNVGKSSLINSLKRSHVVNVGATPGLTRSLQEVQLDKNVKLLDCPGVVMLRSASEDDASIALRNCKRIEKLDDPVGPVKEILKLCPERMLVTIYKVPTFDSVDDFLQKVATVRGRLKKGG…	0	0	0	1	0	0	0	4	0
NbS00010150g0011.1 protein AED:0.09 eAED:0.10 QI:0|0.33|0.5|1|1|1|4|0|755; (*GB) gi|225464091|ref|XP_002269380.1| (e_value=0.0) PREDICTED: root phototropism protein 3 [Vitis vinifera];; (*SWP) sp|Q9FMF5|RPT3_ARATH (e_value=0.0) Root phototropism protein 3 OS=Arabidopsis thaliana GN=RPT3 PE=1 SV=2;; (*TAIR) AT5G64330.1 (e_value=0.0) | Symbols: NPH3, RPT3, JK218 | Phototropic-responsive NPH3 family…	MWESETESVSGRDYGNGVLSASKHGVKTDSFEQKGHSWYVATDVPSDILVQIEDVSFHLHKFLFVYIPTPKNHKKYPLLSRSGKMNRMIYESRDAELSKISLDELPGGPEAFELAAKFCYGIAIDLSATNISGLRCAAEYLEMTEDLEEGNLIFKTEAFLSYVVLSSWRDSILVLKSCEKLSPWAENLQIVRRCSESIAWKACANPKGIKWQYTGKPIKVSSPNWNQMKDSSPSRNQQVVPPDWWFEDVSILRIDHFVRVITAIKVKGMKHELIGAAIVQYAAKWLPGLIKDGSGLADDGSNISNSINGTISGSWRGGLHMIVAGIGDEVPSVQAKDQRMIVESLISIIPQHKDSVSCSFLLRLLRMANMLKVAPALITELEKRVGMQFEQATLADLLI…	0	0	0	0	0	0	0	2	0
NbS00017882g0006.1 protein AED:0.11 eAED:0.11 QI:247|0.88|0.9|1|0.77|0.8|10|452|561; (*GB) gi|225424297|ref|XP_002284658.1| (e_value=0.0) PREDICTED: uncharacterized protein LOC100264607 isoform 1 [Vitis vinifera];; (*TAIR) AT1G70770.2 (e_value=4e-166) | Symbols: | Protein of unknown function DUF2359, transmembrane | chr1:26688622-26691185 REVERSE LENGTH=610;; (*ITAG) Solyc05g026540.2.1 (e_value=0…	MAEKSIAFEPNHSGPITDTTHGWQKVTYAKKQKKKQAKLSDSGKVIANGSVLPGADNVFQSLEKHSGERRRRIAEQTAAMYGVDDAPVRLWLKHRSDDENEDSDAEVGRRGAENGAVEGKKKEKVKKPKKPKVTVAEAAVKIDAADLAAFLADVTVSFESQQEIQLMRFADYFGRAFAAVAGSQFPWLKLFRESPISKIADVPLSHLPEPVYKTSVDWINQRSYEALGSFVLWALDSIVVDLATQLGGSKGSKKGGQQTSSKSQVAMFLVLAMVLRRKPDVLINVLPTLQESPKYQGQDKLSVIAWMIVQACQGDLCVGLYLWAHHTLPLIGGKSGSNPQTRDLILQLVERILSAPKARIILVNGAVRKGERLMPPSSLDLLLRVTFPAPSARVKATER…	0	0	0	1	0	0	0	0	2
NbS00006432g0020.1 protein AED:0.14 eAED:0.14 QI:0|0.85|0.86|1|0.78|0.66|15|354|521; (*GB) gi|357507939|ref|XP_003624258.1| (e_value=0.0) V-type ATP synthase beta chain [Medicago truncatula];; (*SWP) sp|Q9SZN1|VATB2_ARATH (e_value=0.0) V-type proton ATPase subunit B2 OS=Arabidopsis thaliana GN=VHA-B2 PE=2 SV=1;; (*TAIR) AT4G38510.5 (e_value=0.0) | Symbols: | ATPase, V1 complex, subunit B protein …	FSFTNCWSSINYLSPPLDLSSISIRSTSISLSSILLALSWIQKQKRLKYGCGKQQYCHGGGNPGGWNGTVSGVAGPLVILDKVKGPKYQEIVNIRLGDGTTRRGQVLEVDGEKAVVQVFEGTSGIDNKYTTVQFTGEVLKTPVSLDMLGRIFNGSGKPIDNGSSINPSERTYPEEMIQTGISTIDVMNSIARGQKIPLFSAAGLPHNEIAAQICRQAGLVKRLEKSENLLEGGEDDNFAIVFAAMGVNMETAQFFKRDFEENGSMERVTLFLNLANDPTIERIITPRIALTTAEYLAYECGKHVLVILTDMSSYADALREVSAAREEVPGRRGYPGYMYTDLATIYERAGRIEGRTGSITQIPILTMPNDDITHPTPDLTGYITEGQIYIDRQLHNRQI…	0	0	0	0	0	0	0	0	4
NbS00042771g0008.1 protein AED:0.25 eAED:0.27 QI:84|0.84|0.71|0.92|0.92|0.92|14|0|481; (*GB) gi|26986106|emb|CAD27443.1| (e_value=0.0) vacuolar ATPase subunit B [Mesembryanthemum crystallinum];; (*SWP) sp|Q9SZN1|VATB2_ARATH (e_value=0.0) V-type proton ATPase subunit B2 OS=Arabidopsis thaliana GN=VHA-B2 PE=2 SV=1;; (*TAIR) AT4G38510.5 (e_value=0.0) | Symbols: | ATPase, V1 complex, subunit B protei…	MGVAPNNIEMEEGNLEVGMEYRTVSGVAGPLVILDKVKGPKYQEIVNIRLGDGTTRRGQVLEVDGEKAVVQVFEGTSGIDNKYTTVQFTGEEVLSTLVREHIPKTCDFFLIYHHMCNMSILGSSINPSERTYPEEMIQTGISTVDVMNSIARGQKIPLFSAAGLPHNEIAAQICRQAGLVKRLEKSDNLLEGGEGDNFAIVFAAMGVNMETAQFFKRDFEENGSMERVTLFLNLANDPTIERIITPRIALTTAEYLAYECGKHVLVILTDMSSYADALREVSAAREEVPGRRGYPGYMYTDLATIYERAGRIEGRTGSITQIPILTMPNDDITHQTPDLTGYITEGQIYIDRQLHNRQIYPPINVLPSLSRLMKSAIGEGMTRRDHSDVSNQLYANYAI…	0	0	0	0	0	0	0	0	4
NbS00028990g0004.1 protein AED:0.31 eAED:0.33 QI:0|0.66|0.7|1|0.33|0.6|10|109|319; (*GB) gi|356516841|ref|XP_003527101.1| (e_value=8e-131) PREDICTED: LRR repeats and ubiquitin-like domain-containing protein At2g30105-like isoform 1 [Glycine max];; (*SWP) sp|P0C895|Y2010_ARATH (e_value=4e-35) LRR repeats and ubiquitin-like domain-containing protein At2g30105 OS=Arabidopsis thaliana GN=At2g30105 PE…	MGCCSSKAADTKATRMARWRSTGISFPDEVISLERSVRTLDLTHNKLVHIPMEINKLINLQRLILADNLIEHMPVNLGLLQSLKIATLDRNQITILPDELGQLVKLERLSVSANLLTSLPDTIGSLRNLVLLDVSNNKLKFLPESIGSCFSLEELQANDNSIEELPASVCNLVQLKSLCLNNNNLNQVYVFTRFSCLLLVPVAQMPLNLLRQCKSLQNIALHRNPISMDQFQQMEGFKEFEARRKQKFDKQIDSNVIISSKGLDEGVDMLTLRLEVGWHCDSFDFDESDCLCRFTESLSSPSIVDHGFSALTCIYAELQ	0	0	0	0	0	0	1	0	2
NbS00030545g0007.1 protein AED:0.22 eAED:0.22 QI:0|0.33|0.5|1|1|1|4|299|340; (*GB) gi|147788436|emb|CAN63304.1| (e_value=5e-64) hypothetical protein VITISV_002333 [Vitis vinifera];; (*SWP) sp|Q8GYN5|RIN4_ARATH (e_value=8e-14) RPM1-interacting protein 4 OS=Arabidopsis thaliana GN=RIN4 PE=1 SV=1;; (*TAIR) AT3G25070.1 (e_value=6e-15) | Symbols: RIN4 | RPM1 interacting protein 4 | chr3:9132458-913374…	RPNVPKFGNWENDDNTPYTVYFEKARQTRGTGKIINPNDPEENPDMFSNLTPPPPAPSRARPKPQTEEPIGREGAAAKQTREHRLSKEDGDFRQYANSPARNENTGRRASNEHQRGRGSSSGRTGRQSAGSEHSFDKSPLHPHYQAKVNAGRGVASPAWEGKNNSYDSSHGTPGRSFESAHATPGRSKIKQESVKVNAGRGVASPAWEGKNNSYDSSHGTPGRSFESAHATPGRSKIKQESPERGAAVPRFGDWDENDPQSADNYTHIFNKVREERQLGTGNPSGTPSRTSYNPQKQEEKQMVKHFPSIVMIDSSAAVPGNEREDLDYFSEDVKLRRMYK	0	0	1	1	2	1	2	0	2	RIN4
NbS00031141g0005.1 protein AED:0.15 eAED:0.15 QI:45|1|1|1|0.66|0.5|4|2297|291; (*GB) gi|255558490|ref|XP_002520270.1| (e_value=3e-51) protein transporter, putative [Ricinus communis];; (*TAIR) AT1G21380.1 (e_value=6e-30) | Symbols: | Target of Myb protein 1 | chr1:7485806-7488032 REVERSE LENGTH=506;; (*ITAG) Solyc04g063280.2.1 (e_value=1e-108) genomic_reference:SL2.40ch04 gene_region:54521549-545…	MILVNNTVDEDLLCKGLALNDDLQRVLRRHDDIANGTSAITVQPRETPVAPLMNVNHEDDESEDDFSHLARRSSKDPSQAQGRKTVDVKSEPMRITPTLAPPPSSRRPVSTDAGMVDYLSGERFESERSFGTAGSSPIAVSTNSNNVSSIPRSSPKPSSSAPPSDDLLNPRADDDFVNPTASLFTGKSNNGESDTKAKSADHLPPAPWDAPPTTLPPPPARYNQRQQYFEKNVFGGGSSSYDSVVGQTKNLSINSSSPSKQEKPEDALFKDLVDFAKAKSSSSSNQSNRSF	0	0	1	1	0	0	2	1	3	TOM1
NbS00031824g0005.1 protein AED:0.21 eAED:0.21 QI:0|0.88|0.77|0.94|1|1|18|0|948; (*GB) gi|255556695|ref|XP_002519381.1| (e_value=0.0) Serine/threonine-protein kinase PBS1, putative [Ricinus communis];; (*SWP) sp|Q9LT96|Y5977_ARATH (e_value=0.0) Probable leucine-rich repeat receptor-like protein kinase At5g49770 OS=Arabidopsis thaliana GN=At5g49770 PE=2 SV=1;; (*TAIR) AT5G49760.1 (e_value=0.0) | Sy…	MRIQLCFLVVWLHVLAIAAWTDPDDFAALQSLRDSWQNVPPNWAGADPCGSRWEGIGCRNSRVISITLSSMSLSGQLSGDIQGLSELQTLDLSYNKELTGSLPQSIGKLKKLSNLILVGCGFSGPIPDSIGSLTQLVFLSLNSNNFIGRIPATIGYLSKLYWLDLADNKLTGTLPVSSGSSPGLDMLVHTKHFHFGKNQLSGEIPARLFHSNLTLIHLLVENNKLTGNIPDTLGLVQTMEVLRLDRNSLSGSVPQNLNNLTHVNELHISNNNLDGLLPNLTGMNVLNYLAMENTGLQGLVPAKLFSLFQLQTVNMRRNRLNGTLEIDSSYSDQLQFIDMQSNLIDSFTQRPGYPFQILLAGNPVCNEGTTQTYCVQAQQADSYSTPPENCLPTECSSDQ…	0	0	0	0	1	1	2	0	2	RLK1
NbS00009528g0010.1 protein AED:0.26 eAED:0.26 QI:0|0.8|0.33|1|0.8|0.83|6|0|405; (*GB) gi|356497440|ref|XP_003517568.1| (e_value=0.0) PREDICTED: serine/threonine-protein kinase HT1-like [Glycine max];; (*SWP) sp|Q2MHE4|HT1_ARATH (e_value=1e-53) Serine/threonine-protein kinase HT1 OS=Arabidopsis thaliana GN=HT1 PE=1 SV=1;; (*TAIR) AT3G22750.1 (e_value=0.0) | Symbols: | Protein kinase superfamily pr…	MDLKSEEKVLKLDNDEEVVSKLKGVGTVSDNNMESKSPGSISSKDMIFRADKIDLKSLDVQLEKHLSRVWSSNLEKNNHRPKEVWEIDPLKLEIRYLVAKGTYGTVYRGTYDNQDVAVKLLDWGEDGMATAAETAALRSSFRQEVAVWHKLDHPNVTKFVGASMGTSNLKIPSKNPSEGYTTLPSRACCVLVEFLPGGTLKNYLYKNRKKKLAFKIVIQLALDLKFMFFLKLCRLCYLHSKKIVHRDVKAENMLLDTNRTLKIADFGVARVEAQNPKDMTGETGTLGYMAPEVLDGKPYNRKCDVYSFGICLWEIYCCDLPYPDLSFAEVSSAVVRQNLRPDIPRCCPSSLSHIMKKCWDANPDKRPEMDEVVKLLEAIDTSKGGGMIPEDEAGGCFCF…	0	0	0	0	0	0	0	4	6	RLK2
NbS00028917g0011.1 protein AED:0.09 eAED:0.09 QI:154|0.75|0.8|1|0.5|0.8|5|200|932; (*GB) gi|84574832|dbj|BAE48657.1| (e_value=9e-80) hypothetical salt-inducible protein [Prunus mume];; (*TAIR) AT4G14200.1 (e_value=1e-21) | Symbols: | Pentatricopeptide repeat (PPR) superfamily protein | chr4:8185524-8188667 REVERSE LENGTH=784;; (*ITAG) Solyc09g092550.2.1 (e_value=0.0) genomic_reference:SL2.40ch09 …	MDIQDHKFTTTSGHENQAPHLCHKCGWPFPNPHPSARHRRSHKKVCGKIEGYKLSESETADNSTHSAVSDDEHDSDGDQQTPSPIVGKTIVKEISGISDKSYRSEDETFSDAVTEFFDSGISPGLEERPEGVKSLSTNVKRVDDELLKADSTGGSSNDARHATEVNNLESFESAIDQPEVVESLGTKIDCDPIKSEIPVDTSLQDKNTTESIEGEQVHMSSGQTNDLKEIEDINTGEGLVDAAGIAVEVSQSAVSDTNGKTSDNASYESMPQEAEGKNSDPLNLTSDLLEADEQATDNVPIEAKLQHEENEKPDPVDLKLDLSEADVKAVDDVSGDKECEQLDKAEEDKQRISVELSLLVQAPNVPMLELEADSSKEIDGGSQTEFSDSSKTEEVREDV…	0	0	1	1	0	0	3	4	4	APP4
